# Supplementary material
Source: PubMed Central journal article supplement (PMC6055817)
Supplement: CNCR-124-2974-s001.pdf [file CNCR-124-2974-s001.pdf]

## **SUPPLEMENTARY APPENDIX**

Meester RGS, Peterse EFP, Knudsen AB, de Weerd AC, Chen JC, Lietz AP, Dwyer A, Ahnen DJ, Siegel RL, Smith RA, Zauber AG, and Lansdorp-Vogelaar I.

Optimizing Colorectal Cancer Screening by Race and Sex; Microsimulation Analysis II to Inform the American Cancer Society Colorectal Cancer Screening Guideline

CANCER 2018

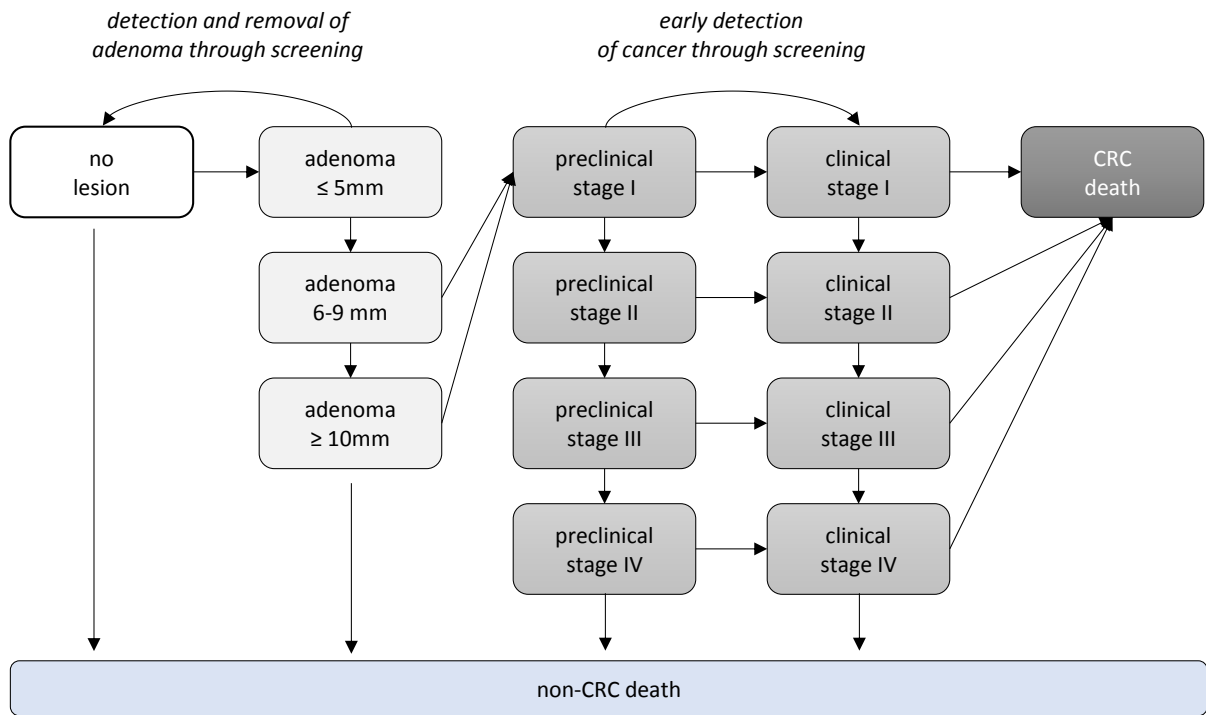

**Supplementary Figure 1. Natural History of CRC and the Effects of Screening as Simulated by MISCAN-Colon and SimCRC**

The opportunity to intervene in the natural history through screening is noted in italic. Screening can either remove an adenoma, thus moving a person to the “no lesion” state, or diagnose a preclinical cancer, which, if detected at an earlier stage, may be more amenable to treatment.

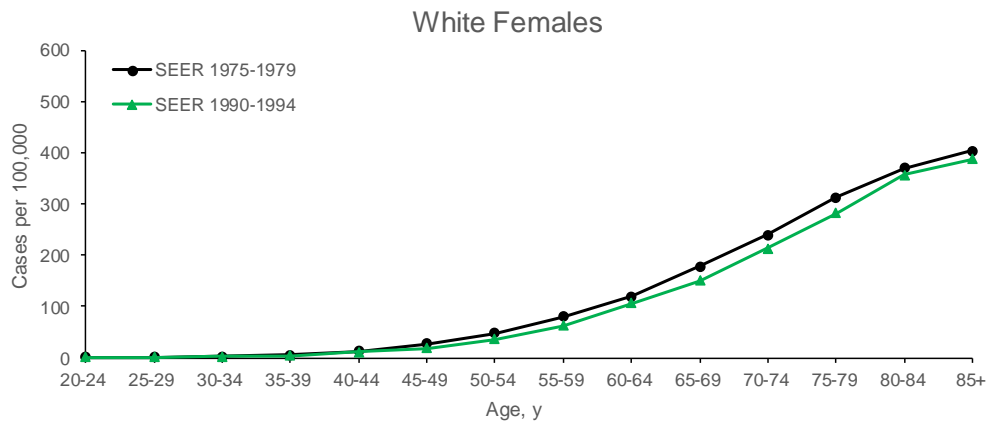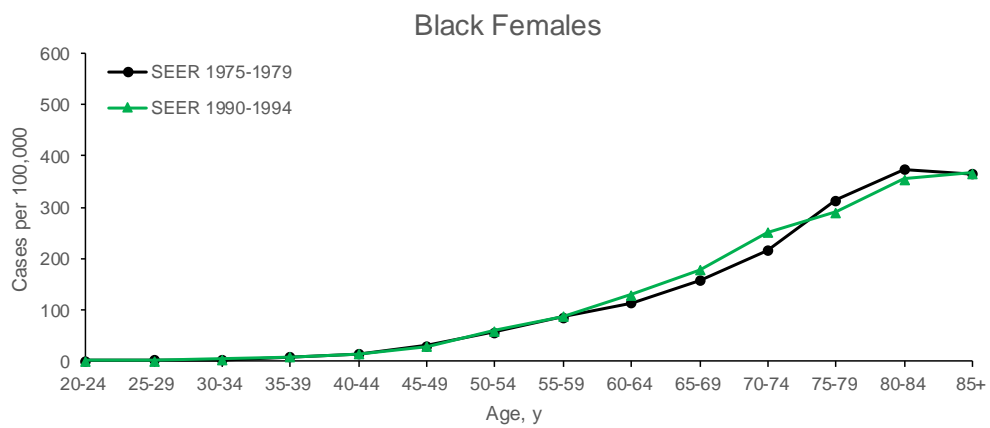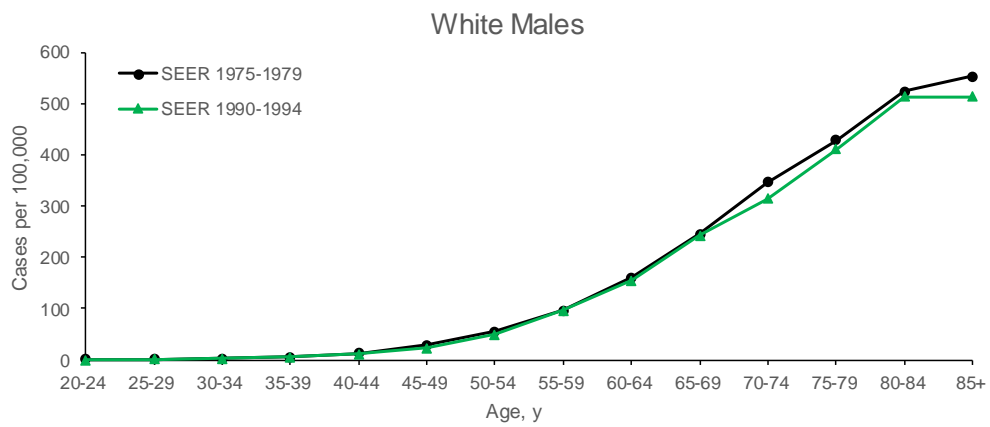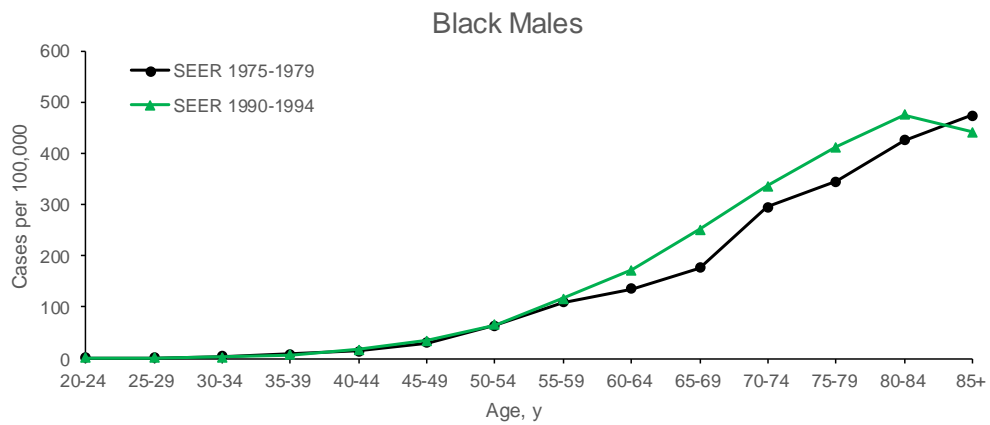

**Supplementary Figure 2. CRC Incidence by Age, Race and Sex in the Surveillance Epidemiology End Results Program (SEER) for the Period 1975-1979 vs 1990-1994.**

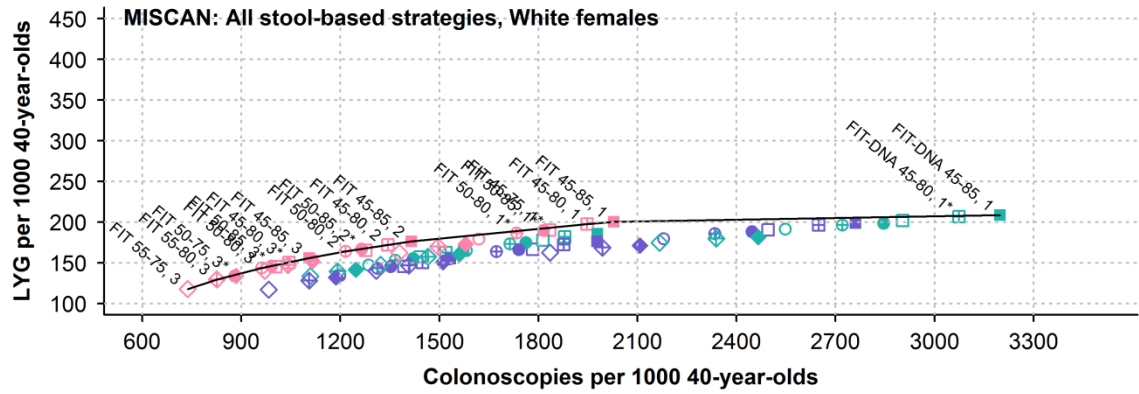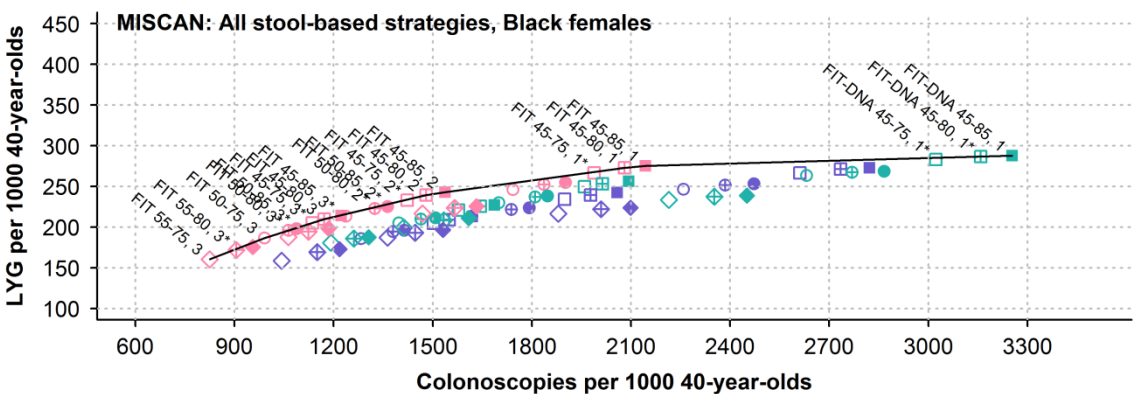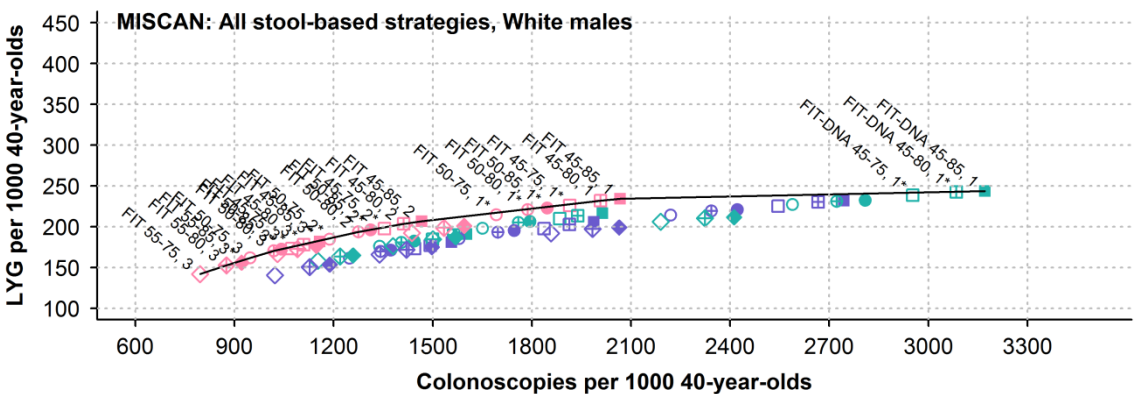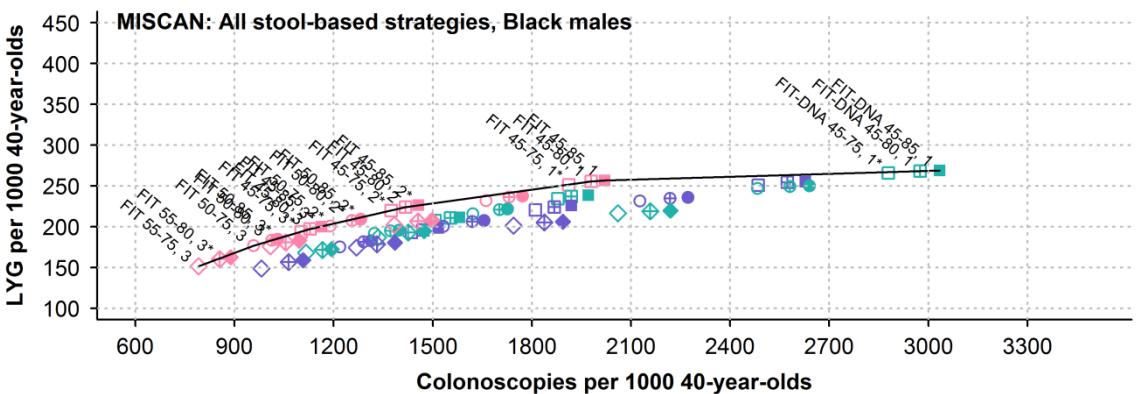

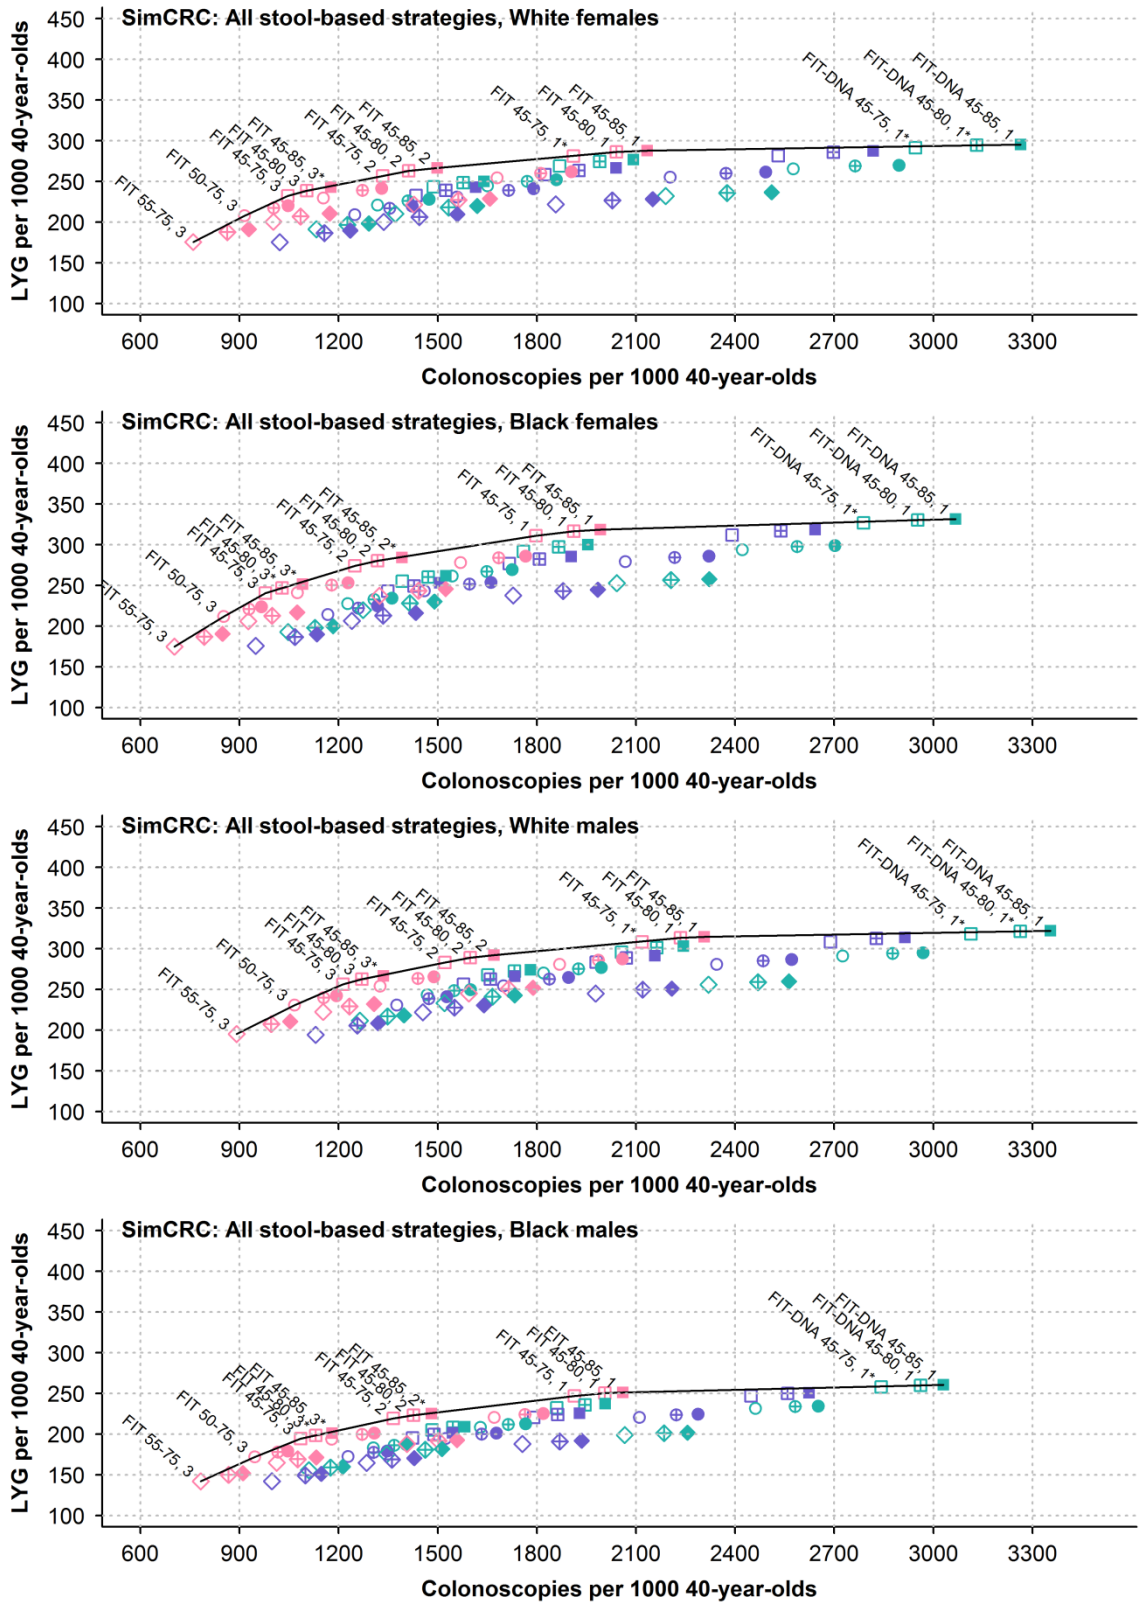

**Supplementary Figure 3. Lifetime Number of Colonoscopies and LYG for Stool-Based Screening Strategies under a Scenario of Stable CRC Risk, by Model and Demographic Subgroup <sup>a</sup>**

Colors reflect the screening test (pink=FIT; purple=HSGFOBT; turquoise=FIT-DNA), symbols reflect the starting age (diamond=55; circle=50; square=45 years), fill reflects end age (empty=75; cross=80; full=85 years). Efficient and near-efficient\* strategies are labelled, with efficiency assessed among all evaluated stool-based screening strategies.

<sup>a</sup> Risk within each age-, race-, and sex-specific demographic subgroup was assumed to have remained stable over time since the early screening phase in the U.S. (1975-1979 for SimCRC; 1990-1994 for MISCAN). Outcomes for a scenario with assumed increased risk are included in Supplementary Table 3-6.

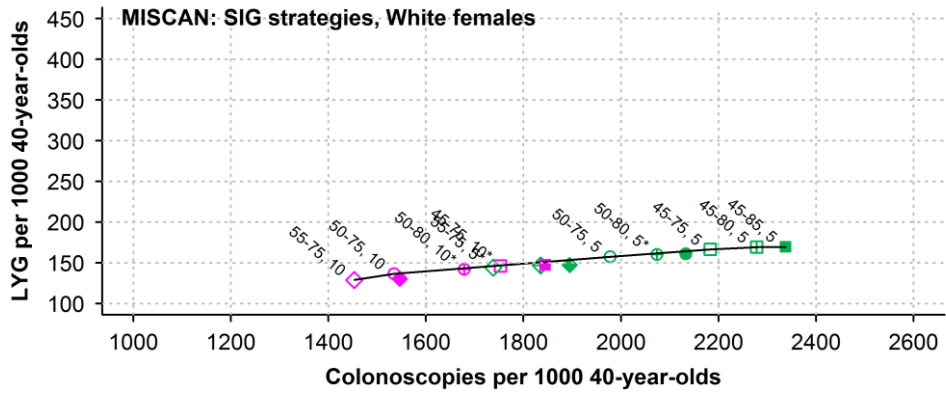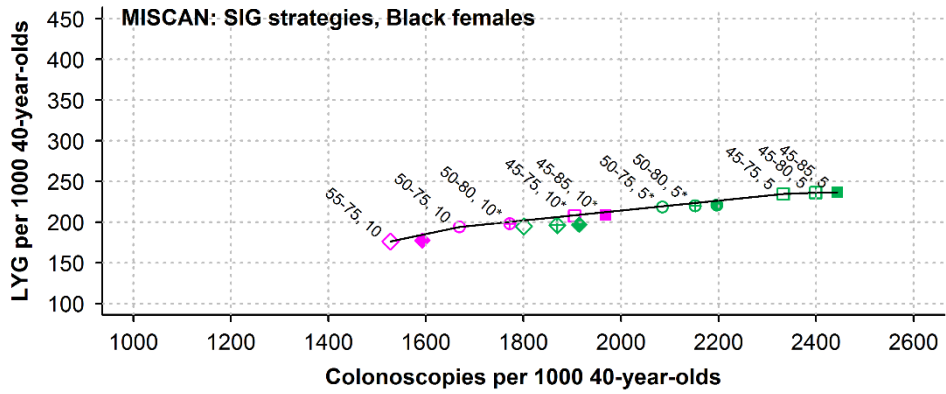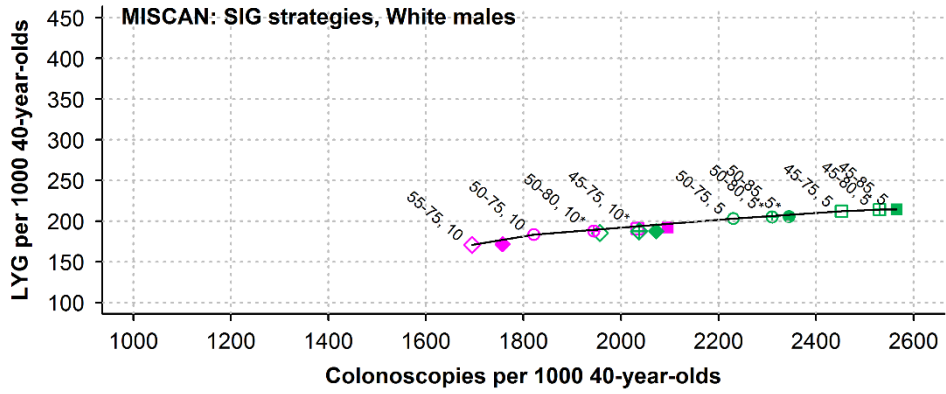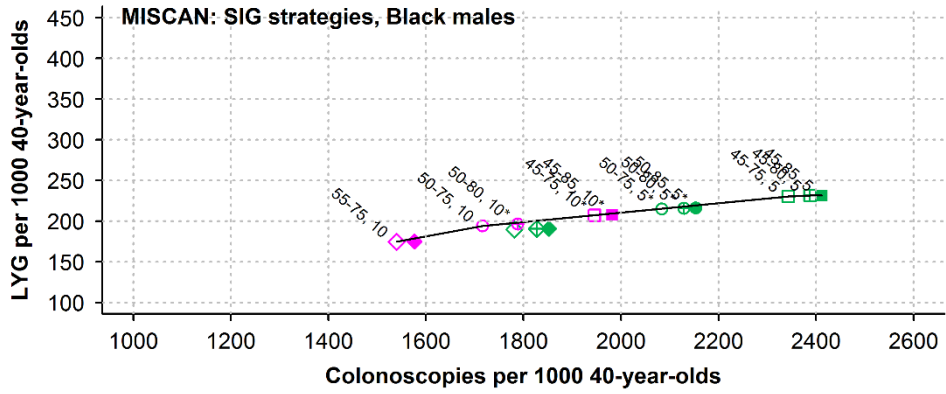

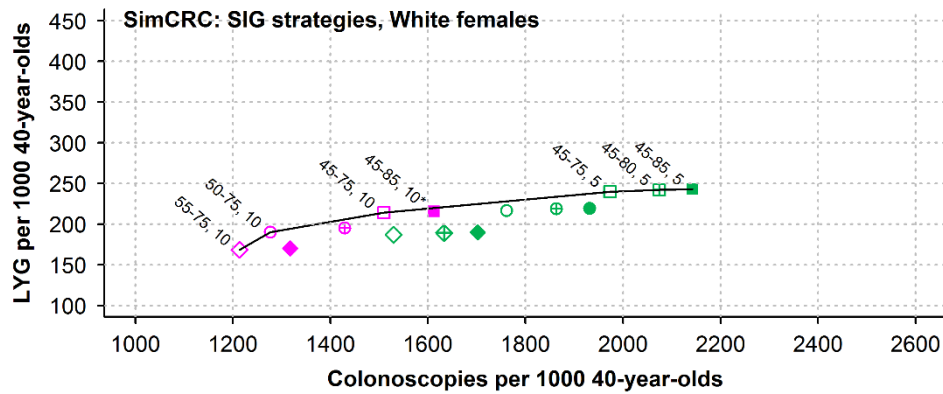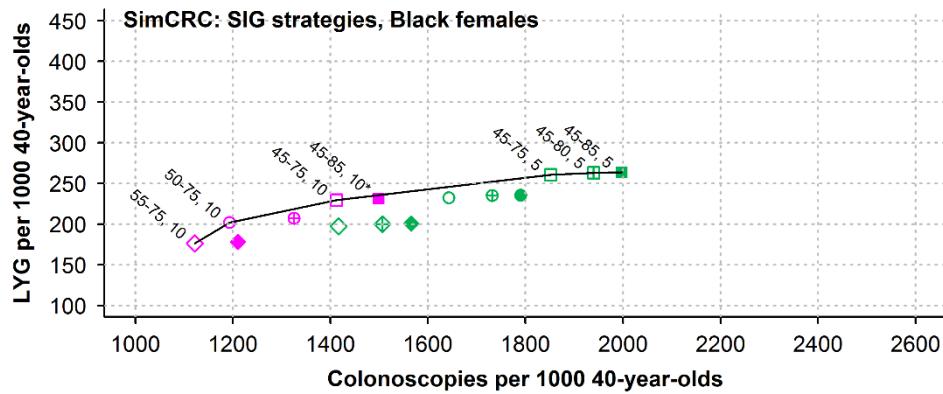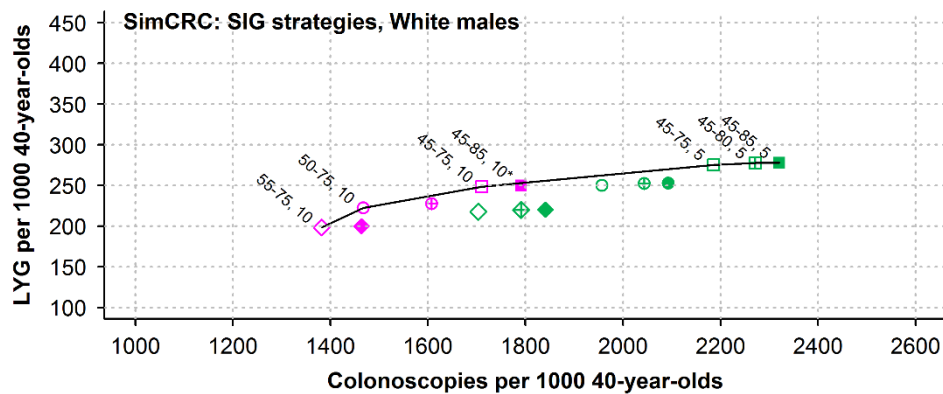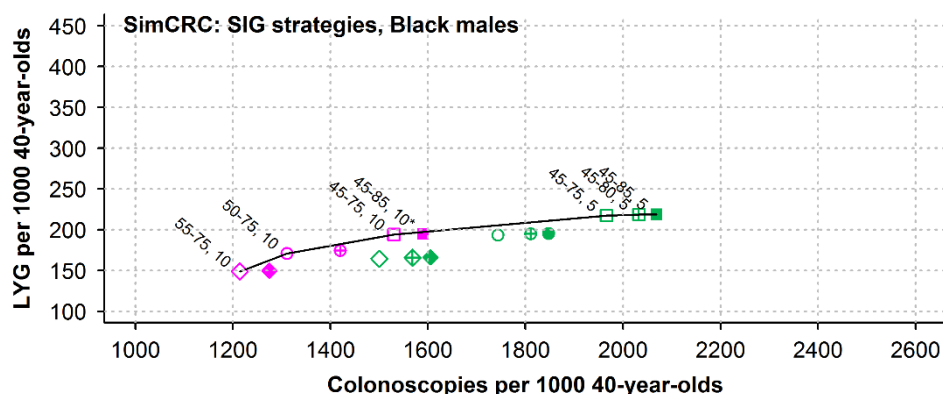

**Supplementary Figure 4. Lifetime Number of Colonoscopies and LYG for Sigmoidoscopy Screening Strategies under a Scenario of Stable CRC Risk, by Model and Demographic Subgroup <sup>a</sup>**

Colors reflect the screening interval (pink=10; green=5 years), symbols reflect the starting age (diamond=55; circle=50; square=45 years), fill reflects end age (empty=75; cross=80; full=85 years). Efficient and near-efficient\* strategies are labelled, with efficiency assessed among all evaluated SIG-based screening strategies.



<sup>a</sup> Risk within each age-, race-, and sex-specific demographic subgroup was assumed to have remained stable over time since the early screening phase in the U.S. (1975-1979 for SimCRC; 1990-1994 for MISCAN). Outcomes for a scenario with assumed increased risk are included in Supplementary Table 3-6.

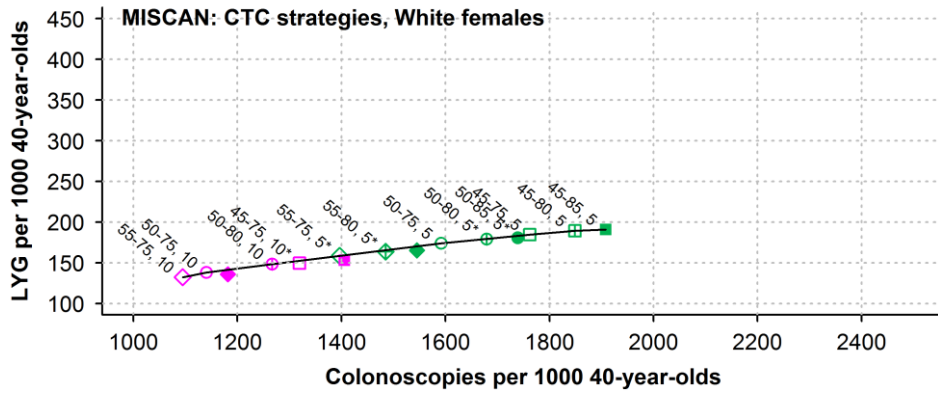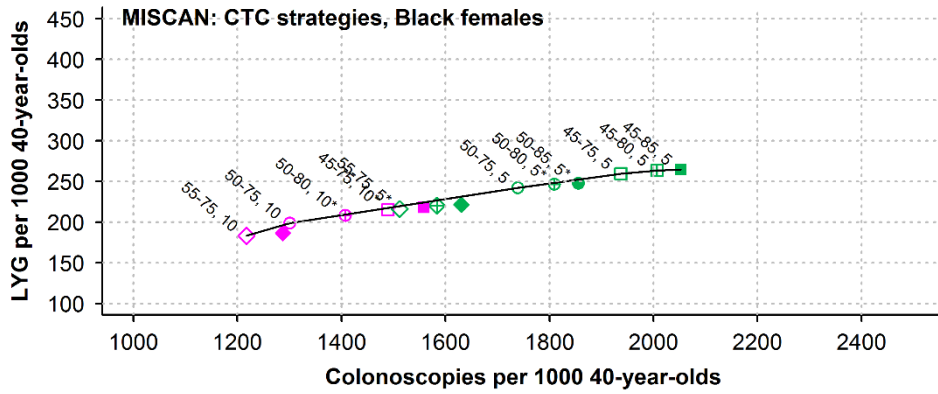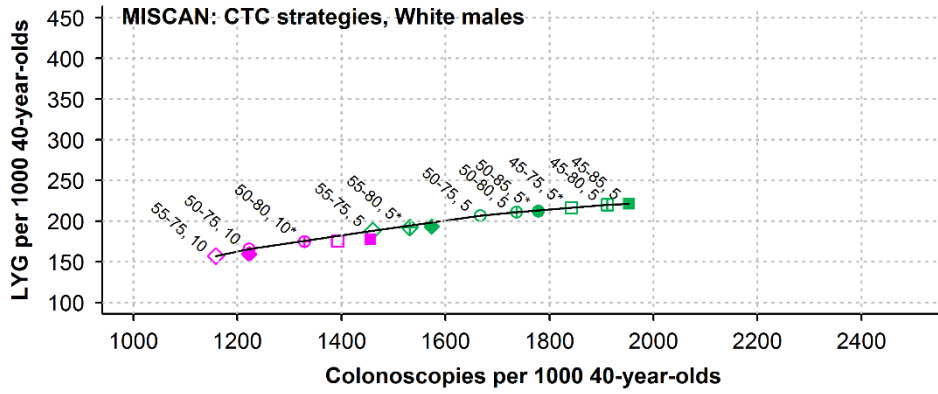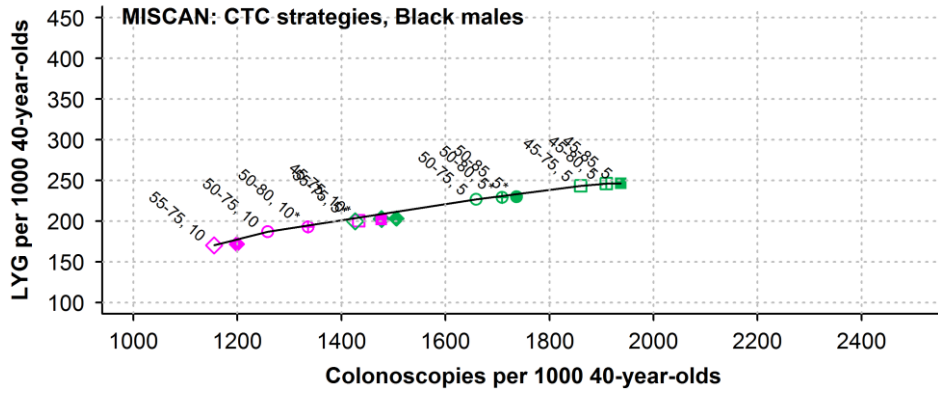

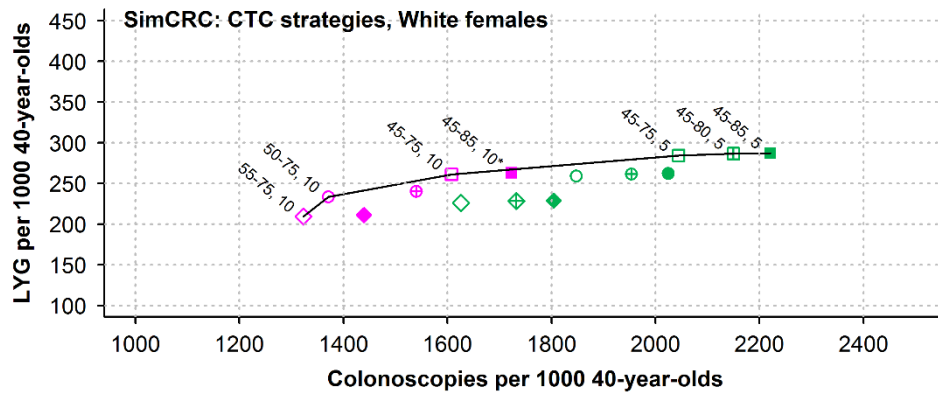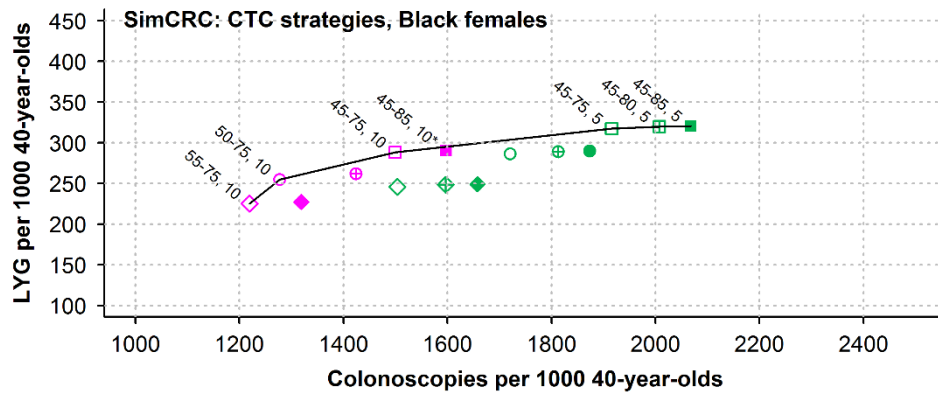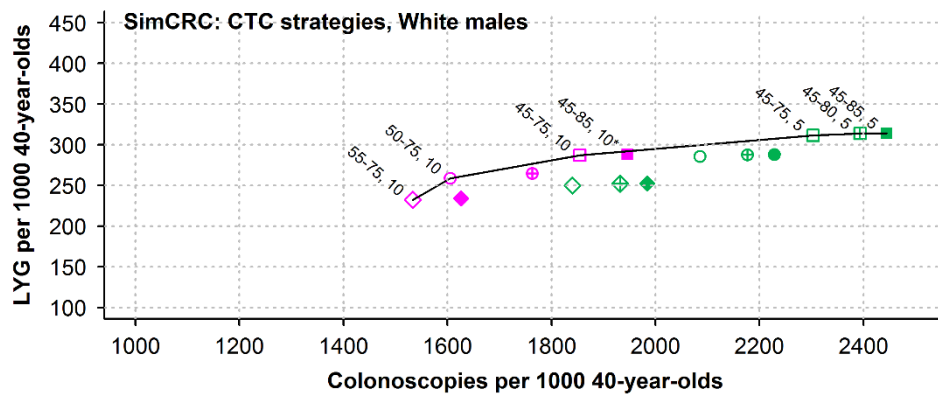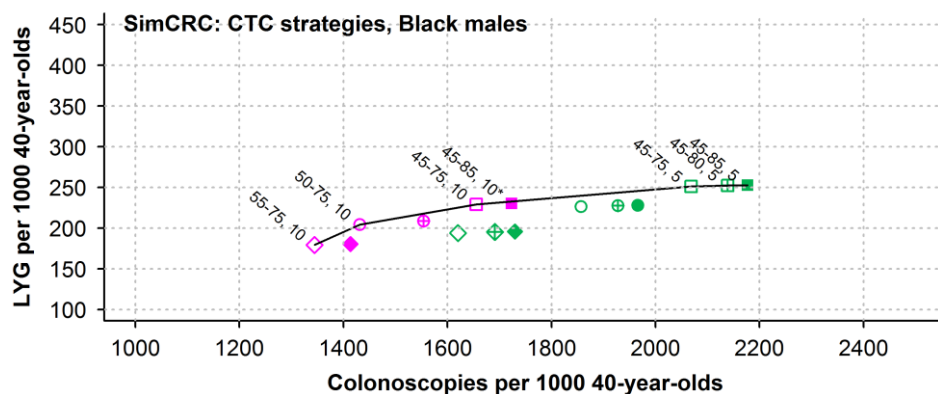

**Supplementary Figure 5. Lifetime Number of Colonoscopies and LYG for CTC Screening Strategies under a Scenario of Stable CRC Risk, by Model and Demographic Subgroup <sup>a</sup>**

Colors reflect the screening interval (pink=10; green=5 years), symbols reflect the starting age (diamond=55; circle=50; square=45 years), fill reflects end age (empty=75; cross=80; full=85 years). Efficient and near-efficient\* strategies are labelled, with efficiency assessed among all evaluated CTC-based screening strategies.

<sup>a</sup> Risk within each age-, race-, and sex-specific demographic subgroup was assumed to have remained stable over time since the early screening phase in the U.S. (1975-1979 for SimCRC; 1990-1994 for MISCAN). Outcomes for a scenario with assumed increased risk are included in Supplementary Table 3-6.

**Supplementary Table 1. Summary of Differences of This Analysis Compared with a Previous Analysis for the US Preventive Services Task Force.**

|                                                                                                          | <b>ACS analysis</b>                                                                                                                               | <b>USPSTF analysis</b>                                                                                                                                                                                                                                                                                                                           |
|----------------------------------------------------------------------------------------------------------|---------------------------------------------------------------------------------------------------------------------------------------------------|--------------------------------------------------------------------------------------------------------------------------------------------------------------------------------------------------------------------------------------------------------------------------------------------------------------------------------------------------|
| <b>Decision models</b>                                                                                   | MISCAN-Colon and SimCRC                                                                                                                           | MISCAN-Colon, SimCRC, and CRC-Spin                                                                                                                                                                                                                                                                                                               |
| <b>Simulated population</b>                                                                              | Race- and sex-specific 40-year-old adults at average risk of CRC                                                                                  | All 40-year-old adults at average risk of CRC                                                                                                                                                                                                                                                                                                    |
| <b>Data source, life expectancy</b>                                                                      | 2013 U.S. lifetables                                                                                                                              | 2009 U.S. lifetables                                                                                                                                                                                                                                                                                                                             |
| <b>Data source, CRC risk</b>                                                                             | SEER 1975-1979 (SimCRC) and SEER 1990-1994 (MISCAN-Colon)                                                                                         | SEER 1975-1979                                                                                                                                                                                                                                                                                                                                   |
| <b>Evaluated scenarios</b>                                                                               | Stable and increased age-specific risk based on trends in incidence under age 40, including a shift to more distal localization                   | Stable age-specific risk                                                                                                                                                                                                                                                                                                                         |
| <b>Evaluated strategies</b>                                                                              | Single-test strategies only                                                                                                                       | Single- and hybrid test strategies                                                                                                                                                                                                                                                                                                               |
| <b>Decision criterion for selection of model-recommendable strategies, Efficiency</b>                    | Reassessed for classes of screening modality other than colonoscopy after selecting age to start and stop                                         | Assessed among start ages 50 and 55 and stop ages 75, 80, and 85 for all screening modalities                                                                                                                                                                                                                                                    |
| <b>Decision criterion for selection of model-recommendable strategies, Incremental burden-to-benefit</b> | For colonoscopy-based screening strategies, an acceptance threshold for the incremental number of colonoscopies per LYG of maximum 50 was applied | For colonoscopy-based screening strategies, an acceptance threshold of less than or equal to the incremental number of colonoscopies per LYG for the strategy recommended by the USPSTF in 2008, namely colonoscopy every 10 years from ages 50 to 75, was applied; this number ranged from 39-65 across the three models included in that study |

Abbreviations: ACS = American Cancer Society; LYG = life-year gained; SEER = Surveillance Epidemiology and End Results Program; USPSTF = US Preventive Services Task Force.

**Supplementary Table 2. Simulated Life Expectancy and Lifetime CRC Risk in the Absence of Screening under Two Scenarios of CRC Risk, by Model and Demographic Subgroup**

|                                     | Scenario 1: Stable CRC risk <sup>a</sup> |               |             |             | Scenario 2: Increased CRC risk <sup>b</sup> |               |             |             |
|-------------------------------------|------------------------------------------|---------------|-------------|-------------|---------------------------------------------|---------------|-------------|-------------|
|                                     | White females                            | Black females | White males | Black males | White females                               | Black females | White males | Black males |
| <u>MISCAN-Colon</u>                 |                                          |               |             |             |                                             |               |             |             |
| Life expectancy, years              | 42.3                                     | 40.0          | 38.5        | 35.3        | 42.1                                        | 39.9          | 38.1        | 35.1        |
| CRC outcomes, per 1000 40-year-olds |                                          |               |             |             |                                             |               |             |             |
| Lifetime CRC incidence              | 59.3                                     | 59.9          | 70.7        | 62.0        | 112.6                                       | 76.7          | 149.0       | 88.0        |
| Lifetime CRC mortality              | 21.9                                     | 28.4          | 27.2        | 29.6        | 42.9                                        | 36.8          | 59.0        | 42.5        |
| LY lost to CRC                      | 278                                      | 387           | 322         | 365         | 539                                         | 497           | 696         | 518         |
| <u>SimCRC</u>                       |                                          |               |             |             |                                             |               |             |             |
| Life expectancy, years              | 42.3                                     | 40.0          | 38.4        | 35.3        | 42.1                                        | 39.9          | 38.1        | 35.1        |
| CRC outcomes, per 1000 40-year-olds |                                          |               |             |             |                                             |               |             |             |
| Lifetime CRC incidence              | 66.5                                     | 64.4          | 78.6        | 58.7        | 119.5                                       | 79.9          | 162.5       | 91.7        |
| Lifetime CRC mortality              | 25.7                                     | 30.0          | 31.0        | 27.0        | 45.4                                        | 37.6          | 64.6        | 43.2        |
| LY lost to CRC                      | 335                                      | 387           | 366         | 307         | 541                                         | 490           | 739         | 510         |

Abbreviations: LY = life-years.

<sup>a</sup> Risk within each age-, race-, and sex-specific demographic subgroup was assumed to have remained stable over time since the early screening period in the U.S. (1975-1979 for SimCRC; 1990-1994 for MISCAN).

<sup>b</sup> CRC risk was increased proportional to observed trends in CRC incidence among adults under 40 years old. Estimated incidence rate ratios were 1.80-1.90 for white females (range across models), 1.24-1.27 for black females, 2.07-2.13 for white males, and 1.41-1.56 for black males.

**Supplementary Table 3. Lifetime Number of Colonoscopies and LYG for All Evaluated Screening Strategies under Two Scenarios for CRC Risk, by Model, in White Females <sup>a</sup>**

| Sub-group                                   | Modality, and age to begin-end screening, interval, y | Outcomes per 1000 40-year-olds |      |      |                   |     |                   |                                 | Relative distance from efficient frontier <sup>d</sup> | ER <sup>e</sup> |
|---------------------------------------------|-------------------------------------------------------|--------------------------------|------|------|-------------------|-----|-------------------|---------------------------------|--------------------------------------------------------|-----------------|
|                                             |                                                       | Stool tests                    | SIGs | CTCs | COLs <sup>b</sup> | LYG | CRC cases averted | CRC deaths averted <sup>c</sup> |                                                        |                 |
| <b>MISCAN - Scenario 1: Stable CRC risk</b> |                                                       |                                |      |      |                   |     |                   |                                 |                                                        |                 |
| WF                                          | No screening                                          | 0                              | 0    | 0    | 59                | 0   | 0                 | 0                               | -                                                      | -               |
| WF                                          | COL 55-75, 15                                         | 0                              | 0    | 0    | 3028              | 166 | 33                | 15                              | 0%                                                     | 17.9            |
| WF                                          | COL 55-80, 15                                         | 0                              | 0    | 0    | 3028              | 166 | 33                | 15                              | 0%                                                     | 17.9            |
| WF                                          | COL 55-85, 15                                         | 0                              | 0    | 0    | 3397              | 168 | 33                | 16                              | -4.7%                                                  | Dom.            |
| WF                                          | COL 50-75, 15                                         | 0                              | 0    | 0    | 3223              | 172 | 32                | 15                              | 0%                                                     | 30.8            |
| WF                                          | COL 50-80, 15                                         | 0                              | 0    | 0    | 3758              | 180 | 34                | 16                              | -2.9%                                                  | Dom.            |
| WF                                          | COL 50-85, 15                                         | 0                              | 0    | 0    | 3758              | 180 | 34                | 16                              | -2.9%                                                  | Dom.            |
| WF                                          | COL 45-75, 15                                         | 0                              | 0    | 0    | 4045              | 187 | 35                | 16                              | -2.5%                                                  | Dom.            |
| WF                                          | COL 45-80, 15                                         | 0                              | 0    | 0    | 4045              | 187 | 35                | 16                              | -2.5%                                                  | Dom.            |
| WF                                          | COL 45-85, 15                                         | 0                              | 0    | 0    | 4045              | 187 | 35                | 16                              | -2.5%                                                  | Dom.            |
| WF                                          | COL 55-75, 10                                         | 0                              | 0    | 0    | 3743              | 178 | 36                | 17                              | -3.3%                                                  | Dom.            |
| WF                                          | COL 55-80, 10                                         | 0                              | 0    | 0    | 3743              | 178 | 36                | 17                              | -3.3%                                                  | Dom.            |
| WF                                          | COL 55-85, 10                                         | 0                              | 0    | 0    | 4081              | 180 | 36                | 17                              | -6.6%                                                  | Dom.            |
| WF                                          | COL 50-75, 10                                         | 0                              | 0    | 0    | 4067              | 192 | 36                | 17                              | 0%                                                     | 43.2            |
| WF                                          | COL 50-80, 10                                         | 0                              | 0    | 0    | 4551              | 196 | 38                | 18                              | -1.2%                                                  | 116.5*          |
| WF                                          | COL 50-85, 10                                         | 0                              | 0    | 0    | 4551              | 196 | 38                | 18                              | -1.2%                                                  | 116.5*          |
| WF                                          | COL 45-75, 10                                         | 0                              | 0    | 0    | 4927              | 204 | 38                | 18                              | 0%                                                     | 74.4            |
| WF                                          | COL 45-80, 10                                         | 0                              | 0    | 0    | 4927              | 204 | 38                | 18                              | 0%                                                     | 74.4            |
| WF                                          | COL 45-85, 10                                         | 0                              | 0    | 0    | 5265              | 205 | 38                | 18                              | -0.7%                                                  | 297.2*          |
| WF                                          | COL 55-75, 5                                          | 0                              | 0    | 0    | 5142              | 190 | 39                | 18                              | -7.2%                                                  | Dom.            |
| WF                                          | COL 55-80, 5                                          | 0                              | 0    | 0    | 5578              | 192 | 39                | 18                              | -7.8%                                                  | Dom.            |
| WF                                          | COL 55-85, 5                                          | 0                              | 0    | 0    | 5880              | 193 | 40                | 18                              | -8.7%                                                  | Dom.            |
| WF                                          | COL 50-75, 5                                          | 0                              | 0    | 0    | 6175              | 209 | 40                | 18                              | -1.9%                                                  | 231.7*          |
| WF                                          | COL 50-80, 5                                          | 0                              | 0    | 0    | 6611              | 211 | 41                | 19                              | -2.6%                                                  | Dom.            |
| WF                                          | COL 50-85, 5                                          | 0                              | 0    | 0    | 6913              | 211 | 41                | 19                              | -3.4%                                                  | Dom.            |
| WF                                          | COL 45-75, 5                                          | 0                              | 0    | 0    | 7219              | 221 | 41                | 19                              | 0%                                                     | 131.9           |
| WF                                          | COL 45-80, 5                                          | 0                              | 0    | 0    | 7655              | 223 | 42                | 19                              | 0%                                                     | 237.0           |
| WF                                          | COL 45-85, 5                                          | 0                              | 0    | 0    | 7957              | 223 | 42                | 19                              | 0%                                                     | 908.9           |
| WF                                          | FIT 55-75, 3                                          | 5566                           | 0    | 0    | 737               | 118 | 13                | 10                              | 0%                                                     | 5.8             |
| WF                                          | FIT 55-80, 3                                          | 6683                           | 0    | 0    | 826               | 130 | 15                | 12                              | 0%                                                     | 7.5             |
| WF                                          | FIT 55-85, 3                                          | 7494                           | 0    | 0    | 884               | 134 | 15                | 13                              | -1.3%                                                  | Dom.            |
| WF                                          | FIT 50-75, 3                                          | 7173                           | 0    | 0    | 880               | 134 | 15                | 11                              | -1.0%                                                  | 12.5*           |
| WF                                          | FIT 50-80, 3                                          | 8236                           | 0    | 0    | 962               | 144 | 16                | 13                              | 0%                                                     | 9.5             |
| WF                                          | FIT 50-85, 3                                          | 8654                           | 0    | 0    | 991               | 146 | 16                | 13                              | -0.1%                                                  | 13.1*           |
| WF                                          | FIT 45-75, 3                                          | 8806                           | 0    | 0    | 1004              | 145 | 16                | 12                              | -1.3%                                                  | Dom.            |
| WF                                          | FIT 45-80, 3                                          | 9347                           | 0    | 0    | 1044              | 151 | 17                | 13                              | -0.1%                                                  | 12.4*           |
| WF                                          | FIT 45-85, 3                                          | 10206                          | 0    | 0    | 1105              | 156 | 17                | 14                              | 0%                                                     | 12.0            |

|    |                  |       |   |   |      |     |    |    |        |        |
|----|------------------|-------|---|---|------|-----|----|----|--------|--------|
| WF | FIT 55-75, 2     | 8188  | 0 | 0 | 971  | 140 | 18 | 12 | -3.1%  | Dom.   |
| WF | FIT 55-80, 2     | 9206  | 0 | 0 | 1041 | 147 | 19 | 14 | -2.1%  | Dom.   |
| WF | FIT 55-85, 2     | 10371 | 0 | 0 | 1115 | 152 | 19 | 14 | -3.0%  | Dom.   |
| WF | FIT 50-75, 2     | 9907  | 0 | 0 | 1115 | 154 | 19 | 13 | -1.7%  | Dom.   |
| WF | FIT 50-80, 2     | 11420 | 0 | 0 | 1216 | 164 | 21 | 14 | 0%     | 13.5   |
| WF | FIT 50-85, 2     | 12193 | 0 | 0 | 1265 | 167 | 21 | 15 | -0.1%  | 16.7*  |
| WF | FIT 45-75, 2     | 12244 | 0 | 0 | 1277 | 165 | 20 | 14 | -1.5%  | Dom.   |
| WF | FIT 45-80, 2     | 13249 | 0 | 0 | 1344 | 172 | 21 | 15 | 0%     | 16.1   |
| WF | FIT 45-85, 2     | 14402 | 0 | 0 | 1415 | 176 | 22 | 16 | 0%     | 16.3   |
| WF | FIT 55-75, 1     | 13579 | 0 | 0 | 1379 | 162 | 24 | 14 | -6.8%  | Dom.   |
| WF | FIT 55-80, 1     | 15655 | 0 | 0 | 1496 | 170 | 26 | 16 | -5.4%  | Dom.   |
| WF | FIT 55-85, 1     | 17232 | 0 | 0 | 1580 | 173 | 27 | 16 | -5.5%  | Dom.   |
| WF | FIT 50-75, 1     | 16959 | 0 | 0 | 1620 | 179 | 26 | 15 | -2.8%  | Dom.   |
| WF | FIT 50-80, 1     | 19018 | 0 | 0 | 1734 | 187 | 28 | 16 | -1.2%  | 30.8*  |
| WF | FIT 50-85, 1     | 20587 | 0 | 0 | 1816 | 190 | 28 | 17 | -1.4%  | 30.3*  |
| WF | FIT 45-75, 1     | 20462 | 0 | 0 | 1834 | 190 | 27 | 16 | -1.5%  | 30.5*  |
| WF | FIT 45-80, 1     | 22513 | 0 | 0 | 1947 | 197 | 29 | 17 | 0%     | 25.1   |
| WF | FIT 45-85, 1     | 24077 | 0 | 0 | 2028 | 200 | 29 | 17 | 0%     | 28.6   |
| WF | FIT-DNA 55-75, 5 | 3821  | 0 | 0 | 1109 | 134 | 18 | 12 | -14.3% | Dom.   |
| WF | FIT-DNA 55-80, 5 | 4304  | 0 | 0 | 1191 | 140 | 19 | 13 | -13.9% | Dom.   |
| WF | FIT-DNA 55-85, 5 | 4652  | 0 | 0 | 1247 | 142 | 19 | 14 | -14.6% | Dom.   |
| WF | FIT-DNA 50-75, 5 | 4652  | 0 | 0 | 1286 | 147 | 20 | 13 | -12.5% | Dom.   |
| WF | FIT-DNA 50-80, 5 | 5131  | 0 | 0 | 1367 | 153 | 20 | 14 | -11.7% | Dom.   |
| WF | FIT-DNA 50-85, 5 | 5477  | 0 | 0 | 1421 | 155 | 20 | 14 | -12.2% | Dom.   |
| WF | FIT-DNA 45-75, 5 | 5508  | 0 | 0 | 1441 | 157 | 21 | 13 | -11.5% | Dom.   |
| WF | FIT-DNA 45-80, 5 | 5985  | 0 | 0 | 1520 | 162 | 21 | 14 | -10.0% | Dom.   |
| WF | FIT-DNA 45-85, 5 | 6330  | 0 | 0 | 1574 | 164 | 21 | 15 | -10.0% | Dom.   |
| WF | FIT-DNA 55-75, 3 | 4807  | 0 | 0 | 1322 | 148 | 22 | 13 | -13.4% | Dom.   |
| WF | FIT-DNA 55-80, 3 | 5701  | 0 | 0 | 1466 | 157 | 24 | 15 | -11.7% | Dom.   |
| WF | FIT-DNA 55-85, 3 | 6344  | 0 | 0 | 1561 | 161 | 24 | 15 | -11.8% | Dom.   |
| WF | FIT-DNA 50-75, 3 | 6138  | 0 | 0 | 1581 | 165 | 24 | 14 | -9.8%  | Dom.   |
| WF | FIT-DNA 50-80, 3 | 6984  | 0 | 0 | 1714 | 173 | 26 | 15 | -8.0%  | Dom.   |
| WF | FIT-DNA 50-85, 3 | 7315  | 0 | 0 | 1762 | 175 | 26 | 16 | -8.1%  | Dom.   |
| WF | FIT-DNA 45-75, 3 | 7498  | 0 | 0 | 1813 | 178 | 25 | 15 | -7.5%  | Dom.   |
| WF | FIT-DNA 45-80, 3 | 7929  | 0 | 0 | 1879 | 182 | 26 | 15 | -6.6%  | Dom.   |
| WF | FIT-DNA 45-85, 3 | 8610  | 0 | 0 | 1979 | 186 | 27 | 16 | -6.4%  | Dom.   |
| WF | FIT-DNA 55-75, 1 | 9625  | 0 | 0 | 2167 | 175 | 31 | 16 | -13.2% | Dom.   |
| WF | FIT-DNA 55-80, 1 | 10928 | 0 | 0 | 2339 | 180 | 33 | 17 | -11.2% | Dom.   |
| WF | FIT-DNA 55-85, 1 | 11936 | 0 | 0 | 2466 | 182 | 33 | 17 | -10.7% | Dom.   |
| WF | FIT-DNA 50-75, 1 | 11871 | 0 | 0 | 2548 | 191 | 33 | 16 | -6.2%  | Dom.   |
| WF | FIT-DNA 50-80, 1 | 13195 | 0 | 0 | 2721 | 196 | 34 | 17 | -4.3%  | Dom.   |
| WF | FIT-DNA 50-85, 1 | 14190 | 0 | 0 | 2846 | 198 | 35 | 18 | -3.8%  | Dom.   |
| WF | FIT-DNA 45-75, 1 | 14257 | 0 | 0 | 2903 | 202 | 34 | 17 | -2.2%  | Dom.   |
| WF | FIT-DNA 45-80, 1 | 15567 | 0 | 0 | 3074 | 207 | 35 | 18 | -0.4%  | 159.6* |
| WF | FIT-DNA 45-85, 1 | 16561 | 0 | 0 | 3198 | 209 | 36 | 18 | 0%     | 140.2  |
| WF | HSgFOBT 55-75, 3 | 5191  | 0 | 0 | 983  | 117 | 14 | 10 | -19.5% | Dom.   |



|    |                  |       |      |      |      |     |    |    |        |       |
|----|------------------|-------|------|------|------|-----|----|----|--------|-------|
| WF | HSgFOBT 55-80, 3 | 6198  | 0    | 0    | 1105 | 128 | 16 | 12 | -17.7% | Dom.  |
| WF | HSgFOBT 55-85, 3 | 6925  | 0    | 0    | 1187 | 132 | 16 | 13 | -18.4% | Dom.  |
| WF | HSgFOBT 50-75, 3 | 6637  | 0    | 0    | 1199 | 134 | 17 | 11 | -17.5% | Dom.  |
| WF | HSgFOBT 50-80, 3 | 7590  | 0    | 0    | 1312 | 143 | 17 | 13 | -15.8% | Dom.  |
| WF | HSgFOBT 50-85, 3 | 7964  | 0    | 0    | 1353 | 145 | 17 | 13 | -15.8% | Dom.  |
| WF | HSgFOBT 45-75, 3 | 8104  | 0    | 0    | 1393 | 146 | 18 | 12 | -16.7% | Dom.  |
| WF | HSgFOBT 45-80, 3 | 8589  | 0    | 0    | 1449 | 150 | 18 | 13 | -15.4% | Dom.  |
| WF | HSgFOBT 45-85, 3 | 9356  | 0    | 0    | 1533 | 155 | 18 | 14 | -14.4% | Dom.  |
| WF | HSgFOBT 55-75, 2 | 7408  | 0    | 0    | 1309 | 140 | 19 | 13 | -17.4% | Dom.  |
| WF | HSgFOBT 55-80, 2 | 8287  | 0    | 0    | 1407 | 147 | 20 | 14 | -16.6% | Dom.  |
| WF | HSgFOBT 55-85, 2 | 9284  | 0    | 0    | 1511 | 151 | 20 | 14 | -16.4% | Dom.  |
| WF | HSgFOBT 50-75, 2 | 8900  | 0    | 0    | 1530 | 155 | 21 | 13 | -14.5% | Dom.  |
| WF | HSgFOBT 50-80, 2 | 10199 | 0    | 0    | 1673 | 164 | 22 | 15 | -12.2% | Dom.  |
| WF | HSgFOBT 50-85, 2 | 10859 | 0    | 0    | 1741 | 166 | 22 | 15 | -12.2% | Dom.  |
| WF | HSgFOBT 45-75, 2 | 10924 | 0    | 0    | 1783 | 167 | 22 | 14 | -12.7% | Dom.  |
| WF | HSgFOBT 45-80, 2 | 11786 | 0    | 0    | 1877 | 172 | 23 | 15 | -11.4% | Dom.  |
| WF | HSgFOBT 45-85, 2 | 12768 | 0    | 0    | 1978 | 176 | 23 | 16 | -11.3% | Dom.  |
| WF | HSgFOBT 55-75, 1 | 11197 | 0    | 0    | 1835 | 162 | 26 | 15 | -15.8% | Dom.  |
| WF | HSgFOBT 55-80, 1 | 12775 | 0    | 0    | 1994 | 169 | 27 | 16 | -15.2% | Dom.  |
| WF | HSgFOBT 55-85, 1 | 13974 | 0    | 0    | 2108 | 171 | 28 | 16 | -14.7% | Dom.  |
| WF | HSgFOBT 50-75, 1 | 13803 | 0    | 0    | 2179 | 180 | 28 | 15 | -10.8% | Dom.  |
| WF | HSgFOBT 50-80, 1 | 15376 | 0    | 0    | 2335 | 186 | 29 | 16 | -8.2%  | Dom.  |
| WF | HSgFOBT 50-85, 1 | 16565 | 0    | 0    | 2447 | 188 | 30 | 17 | -7.5%  | Dom.  |
| WF | HSgFOBT 45-75, 1 | 16527 | 0    | 0    | 2496 | 190 | 29 | 16 | -6.5%  | Dom.  |
| WF | HSgFOBT 45-80, 1 | 18091 | 0    | 0    | 2649 | 196 | 30 | 17 | -4.1%  | Dom.  |
| WF | HSgFOBT 45-85, 1 | 19275 | 0    | 0    | 2760 | 199 | 31 | 17 | -3.4%  | Dom.  |
| WF | SIG 55-75, 10    | 0     | 2367 | 0    | 1453 | 129 | 26 | 12 | 0%     | 10.8  |
| WF | SIG 55-80, 10    | 0     | 2367 | 0    | 1453 | 129 | 26 | 12 | 0%     | 10.8  |
| WF | SIG 55-85, 10    | 0     | 2724 | 0    | 1546 | 131 | 26 | 13 | -4.9%  | Dom.  |
| WF | SIG 50-75, 10    | 0     | 2537 | 0    | 1534 | 137 | 26 | 12 | 0%     | 10.5  |
| WF | SIG 50-80, 10    | 0     | 3031 | 0    | 1679 | 142 | 27 | 13 | -1.0%  | 26.6* |
| WF | SIG 50-85, 10    | 0     | 3031 | 0    | 1679 | 142 | 27 | 13 | -1.0%  | 26.6* |
| WF | SIG 45-75, 10    | 0     | 3284 | 0    | 1753 | 146 | 27 | 13 | -0.5%  | 22.9* |
| WF | SIG 45-80, 10    | 0     | 3284 | 0    | 1753 | 146 | 27 | 13 | -0.5%  | 22.9* |
| WF | SIG 45-85, 10    | 0     | 3640 | 0    | 1844 | 148 | 28 | 14 | -2.4%  | Dom.  |
| WF | SIG 55-75, 5     | 0     | 3454 | 0    | 1738 | 144 | 29 | 14 | -1.5%  | 27.3* |
| WF | SIG 55-80, 5     | 0     | 3867 | 0    | 1835 | 147 | 30 | 14 | -2.8%  | Dom.  |
| WF | SIG 55-85, 5     | 0     | 4161 | 0    | 1895 | 147 | 30 | 14 | -4.1%  | Dom.  |
| WF | SIG 50-75, 5     | 0     | 4220 | 0    | 1978 | 158 | 30 | 14 | 0%     | 21.1  |
| WF | SIG 50-80, 5     | 0     | 4631 | 0    | 2074 | 160 | 31 | 15 | -1.0%  | 37.1* |
| WF | SIG 50-85, 5     | 0     | 4924 | 0    | 2133 | 161 | 31 | 15 | -2.1%  | Dom.  |
| WF | SIG 45-75, 5     | 0     | 5025 | 0    | 2183 | 167 | 31 | 15 | 0%     | 23.1  |
| WF | SIG 45-80, 5     | 0     | 5435 | 0    | 2279 | 169 | 32 | 15 | 0%     | 36.5  |
| WF | SIG 45-85, 5     | 0     | 5727 | 0    | 2338 | 170 | 32 | 15 | 0%     | 92.2  |
| WF | CTC 55-75, 10    | 0     | 0    | 2448 | 1095 | 132 | 22 | 12 | 0%     | 7.8   |
| WF | CTC 55-80, 10    | 0     | 0    | 2448 | 1095 | 132 | 22 | 12 | 0%     | 7.8   |

|                                                |               |      |   |      |      |     |    |    |       |        |
|------------------------------------------------|---------------|------|---|------|------|-----|----|----|-------|--------|
| WF                                             | CTC 55-85, 10 | 0    | 0 | 2837 | 1182 | 136 | 22 | 13 | -4.0% | Dom.   |
| WF                                             | CTC 50-75, 10 | 0    | 0 | 2614 | 1141 | 138 | 21 | 12 | 0%    | 7.9    |
| WF                                             | CTC 50-80, 10 | 0    | 0 | 3148 | 1267 | 149 | 24 | 14 | 0%    | 12.1   |
| WF                                             | CTC 50-85, 10 | 0    | 0 | 3148 | 1267 | 149 | 24 | 14 | 0%    | 12.1   |
| WF                                             | CTC 45-75, 10 | 0    | 0 | 3394 | 1320 | 150 | 23 | 13 | -1.9% | 45.6*  |
| WF                                             | CTC 45-80, 10 | 0    | 0 | 3394 | 1320 | 150 | 23 | 13 | -1.9% | 45.6*  |
| WF                                             | CTC 45-85, 10 | 0    | 0 | 3781 | 1406 | 153 | 24 | 14 | -3.9% | Dom.   |
| WF                                             | CTC 55-75, 5  | 0    | 0 | 3657 | 1397 | 159 | 27 | 14 | 0.0%  | 12.8*  |
| WF                                             | CTC 55-80, 5  | 0    | 0 | 4110 | 1485 | 164 | 29 | 15 | -1.1% | 14.3*  |
| WF                                             | CTC 55-85, 5  | 0    | 0 | 4437 | 1545 | 165 | 30 | 16 | -2.9% | Dom.   |
| WF                                             | CTC 50-75, 5  | 0    | 0 | 4466 | 1592 | 174 | 29 | 15 | 0%    | 12.8   |
| WF                                             | CTC 50-80, 5  | 0    | 0 | 4917 | 1679 | 179 | 30 | 16 | -0.2% | 17.4*  |
| WF                                             | CTC 50-85, 5  | 0    | 0 | 5242 | 1739 | 181 | 31 | 16 | -1.4% | 22.4*  |
| WF                                             | CTC 45-75, 5  | 0    | 0 | 5305 | 1762 | 184 | 30 | 15 | 0%    | 16.2   |
| WF                                             | CTC 45-80, 5  | 0    | 0 | 5754 | 1849 | 189 | 31 | 16 | 0%    | 18.0   |
| WF                                             | CTC 45-85, 5  | 0    | 0 | 6079 | 1908 | 191 | 32 | 17 | 0%    | 38.8   |
| <b>MISCAN - Scenario 2: Increased CRC risk</b> |               |      |   |      |      |     |    |    |       |        |
| WF                                             | No screening  | 0    | 0 | 0    | 113  | 0   | 0  | 0  | -     | -      |
| WF                                             | COL 55-75, 15 | 0    | 0 | 0    | 3950 | 328 | 65 | 31 | 0%    | 11.7   |
| WF                                             | COL 55-80, 15 | 0    | 0 | 0    | 3950 | 328 | 65 | 31 | 0%    | 11.7   |
| WF                                             | COL 55-85, 15 | 0    | 0 | 0    | 4184 | 331 | 65 | 32 | -2.5% | Dom.   |
| WF                                             | COL 50-75, 15 | 0    | 0 | 0    | 4266 | 343 | 64 | 30 | 0%    | 20.5   |
| WF                                             | COL 50-80, 15 | 0    | 0 | 0    | 4652 | 355 | 68 | 33 | -1.8% | 34.0*  |
| WF                                             | COL 50-85, 15 | 0    | 0 | 0    | 4652 | 355 | 68 | 33 | -1.8% | 34.0*  |
| WF                                             | COL 45-75, 15 | 0    | 0 | 0    | 5038 | 366 | 68 | 33 | -3.1% | Dom.   |
| WF                                             | COL 45-80, 15 | 0    | 0 | 0    | 5038 | 366 | 68 | 33 | -3.1% | Dom.   |
| WF                                             | COL 45-85, 15 | 0    | 0 | 0    | 5038 | 366 | 68 | 33 | -3.1% | Dom.   |
| WF                                             | COL 55-75, 10 | 0    | 0 | 0    | 4515 | 349 | 70 | 33 | -1.5% | 40.5*  |
| WF                                             | COL 55-80, 10 | 0    | 0 | 0    | 4515 | 349 | 70 | 33 | -1.5% | 40.5*  |
| WF                                             | COL 55-85, 10 | 0    | 0 | 0    | 4703 | 351 | 70 | 33 | -3.4% | Dom.   |
| WF                                             | COL 50-75, 10 | 0    | 0 | 0    | 5004 | 377 | 71 | 34 | 0%    | 21.9   |
| WF                                             | COL 50-80, 10 | 0    | 0 | 0    | 5310 | 383 | 73 | 35 | -0.4% | 48.4*  |
| WF                                             | COL 50-85, 10 | 0    | 0 | 0    | 5310 | 383 | 73 | 35 | -0.4% | 48.4*  |
| WF                                             | COL 45-75, 10 | 0    | 0 | 0    | 5823 | 398 | 74 | 35 | 0%    | 39.4   |
| WF                                             | COL 45-80, 10 | 0    | 0 | 0    | 5823 | 398 | 74 | 35 | 0%    | 39.4   |
| WF                                             | COL 45-85, 10 | 0    | 0 | 0    | 6011 | 399 | 75 | 35 | -0.4% | 119.7* |
| WF                                             | COL 55-75, 5  | 0    | 0 | 0    | 5503 | 370 | 74 | 34 | -5.2% | Dom.   |
| WF                                             | COL 55-80, 5  | 0    | 0 | 0    | 5740 | 372 | 76 | 35 | -6.0% | Dom.   |
| WF                                             | COL 55-85, 5  | 0    | 0 | 0    | 5880 | 372 | 76 | 35 | -6.6% | Dom.   |
| WF                                             | COL 50-75, 5  | 0    | 0 | 0    | 6539 | 407 | 78 | 36 | -0.9% | 79.7*  |
| WF                                             | COL 50-80, 5  | 0    | 0 | 0    | 6775 | 409 | 79 | 36 | -1.3% | 82.7*  |
| WF                                             | COL 50-85, 5  | 0    | 0 | 0    | 6916 | 410 | 79 | 37 | -1.8% | 91.5*  |
| WF                                             | COL 45-75, 5  | 0    | 0 | 0    | 7585 | 429 | 80 | 37 | 0%    | 56.1   |
| WF                                             | COL 45-80, 5  | 0    | 0 | 0    | 7821 | 432 | 81 | 37 | 0%    | 93.0   |
| WF                                             | COL 45-85, 5  | 0    | 0 | 0    | 7962 | 432 | 81 | 37 | 0%    | 328.0  |
| WF                                             | FIT 55-75, 3  | 5302 | 0 | 0    | 1195 | 227 | 27 | 20 | 0%    | 4.8    |

|    |                  |       |   |   |      |     |    |    |        |       |
|----|------------------|-------|---|---|------|-----|----|----|--------|-------|
| WF | FIT 55-80, 3     | 6248  | 0 | 0 | 1317 | 249 | 30 | 24 | 0%     | 5.6   |
| WF | FIT 55-85, 3     | 6893  | 0 | 0 | 1390 | 257 | 29 | 25 | -1.0%  | 9.1*  |
| WF | FIT 50-75, 3     | 6815  | 0 | 0 | 1407 | 259 | 30 | 22 | -1.2%  | 9.2*  |
| WF | FIT 50-80, 3     | 7700  | 0 | 0 | 1516 | 278 | 32 | 25 | 0%     | 6.9   |
| WF | FIT 50-85, 3     | 8031  | 0 | 0 | 1553 | 282 | 32 | 26 | 0.0%   | 8.8*  |
| WF | FIT 45-75, 3     | 8367  | 0 | 0 | 1583 | 281 | 32 | 24 | -1.6%  | Dom.  |
| WF | FIT 45-80, 3     | 8818  | 0 | 0 | 1635 | 291 | 34 | 25 | -0.2%  | 9.2*  |
| WF | FIT 45-85, 3     | 9500  | 0 | 0 | 1711 | 300 | 34 | 27 | 0%     | 8.8   |
| WF | FIT 55-75, 2     | 7623  | 0 | 0 | 1532 | 271 | 36 | 25 | -3.1%  | Dom.  |
| WF | FIT 55-80, 2     | 8444  | 0 | 0 | 1620 | 284 | 38 | 27 | -1.9%  | 16.3* |
| WF | FIT 55-85, 2     | 9328  | 0 | 0 | 1706 | 292 | 38 | 28 | -2.3%  | Dom.  |
| WF | FIT 50-75, 2     | 9268  | 0 | 0 | 1742 | 298 | 38 | 25 | -1.8%  | Dom.  |
| WF | FIT 50-80, 2     | 10477 | 0 | 0 | 1867 | 317 | 41 | 28 | 0%     | 9.0   |
| WF | FIT 50-85, 2     | 11058 | 0 | 0 | 1922 | 323 | 41 | 30 | 0.0%   | 10.6* |
| WF | FIT 45-75, 2     | 11456 | 0 | 0 | 1964 | 322 | 41 | 27 | -1.5%  | Dom.  |
| WF | FIT 45-80, 2     | 12254 | 0 | 0 | 2046 | 334 | 43 | 29 | -0.1%  | 10.6* |
| WF | FIT 45-85, 2     | 13118 | 0 | 0 | 2127 | 342 | 43 | 30 | 0%     | 10.5  |
| WF | FIT 55-75, 1     | 12302 | 0 | 0 | 2082 | 316 | 49 | 28 | -6.6%  | Dom.  |
| WF | FIT 55-80, 1     | 13860 | 0 | 0 | 2209 | 330 | 52 | 31 | -5.1%  | Dom.  |
| WF | FIT 55-85, 1     | 14960 | 0 | 0 | 2290 | 335 | 53 | 32 | -5.0%  | Dom.  |
| WF | FIT 50-75, 1     | 15404 | 0 | 0 | 2411 | 350 | 52 | 30 | -2.7%  | Dom.  |
| WF | FIT 50-80, 1     | 16931 | 0 | 0 | 2532 | 364 | 55 | 32 | -1.1%  | 18.9* |
| WF | FIT 50-85, 1     | 18014 | 0 | 0 | 2611 | 369 | 56 | 33 | -1.0%  | 18.2* |
| WF | FIT 45-75, 1     | 18692 | 0 | 0 | 2690 | 371 | 54 | 31 | -1.6%  | 19.3* |
| WF | FIT 45-80, 1     | 20204 | 0 | 0 | 2808 | 385 | 57 | 33 | -0.1%  | 16.1* |
| WF | FIT 45-85, 1     | 21280 | 0 | 0 | 2885 | 390 | 58 | 34 | 0%     | 16.0  |
| WF | FIT-DNA 55-75, 5 | 3570  | 0 | 0 | 1690 | 259 | 36 | 24 | -13.1% | Dom.  |
| WF | FIT-DNA 55-80, 5 | 3951  | 0 | 0 | 1785 | 269 | 38 | 26 | -12.6% | Dom.  |
| WF | FIT-DNA 55-85, 5 | 4209  | 0 | 0 | 1844 | 273 | 38 | 27 | -13.3% | Dom.  |
| WF | FIT-DNA 50-75, 5 | 4347  | 0 | 0 | 1938 | 287 | 39 | 25 | -11.6% | Dom.  |
| WF | FIT-DNA 50-80, 5 | 4721  | 0 | 0 | 2029 | 297 | 41 | 27 | -10.8% | Dom.  |
| WF | FIT-DNA 50-85, 5 | 4976  | 0 | 0 | 2086 | 301 | 41 | 28 | -11.2% | Dom.  |
| WF | FIT-DNA 45-75, 5 | 5161  | 0 | 0 | 2145 | 303 | 41 | 26 | -11.7% | Dom.  |
| WF | FIT-DNA 45-80, 5 | 5532  | 0 | 0 | 2234 | 314 | 42 | 28 | -10.1% | Dom.  |
| WF | FIT-DNA 45-85, 5 | 5784  | 0 | 0 | 2290 | 317 | 42 | 29 | -10.1% | Dom.  |
| WF | FIT-DNA 55-75, 3 | 4475  | 0 | 0 | 1989 | 287 | 44 | 26 | -12.8% | Dom.  |
| WF | FIT-DNA 55-80, 3 | 5169  | 0 | 0 | 2148 | 305 | 47 | 29 | -11.3% | Dom.  |
| WF | FIT-DNA 55-85, 3 | 5628  | 0 | 0 | 2241 | 311 | 48 | 30 | -11.1% | Dom.  |
| WF | FIT-DNA 50-75, 3 | 5684  | 0 | 0 | 2337 | 322 | 48 | 28 | -9.3%  | Dom.  |
| WF | FIT-DNA 50-80, 3 | 6325  | 0 | 0 | 2478 | 337 | 51 | 30 | -7.4%  | Dom.  |
| WF | FIT-DNA 50-85, 3 | 6561  | 0 | 0 | 2525 | 340 | 51 | 31 | -7.3%  | Dom.  |
| WF | FIT-DNA 45-75, 3 | 6941  | 0 | 0 | 2633 | 345 | 50 | 29 | -7.8%  | Dom.  |
| WF | FIT-DNA 45-80, 3 | 7268  | 0 | 0 | 2703 | 353 | 52 | 30 | -6.8%  | Dom.  |
| WF | FIT-DNA 45-85, 3 | 7754  | 0 | 0 | 2800 | 360 | 53 | 32 | -6.4%  | Dom.  |
| WF | FIT-DNA 55-75, 1 | 8442  | 0 | 0 | 3003 | 341 | 61 | 31 | -12.8% | Dom.  |
| WF | FIT-DNA 55-80, 1 | 9319  | 0 | 0 | 3149 | 350 | 64 | 33 | -11.1% | Dom.  |

|    |                  |       |      |   |      |     |    |    |        |        |
|----|------------------|-------|------|---|------|-----|----|----|--------|--------|
| WF | FIT-DNA 55-85, 1 | 9936  | 0    | 0 | 3244 | 353 | 65 | 33 | -10.6% | Dom.   |
| WF | FIT-DNA 50-75, 1 | 10441 | 0    | 0 | 3478 | 375 | 65 | 33 | -5.7%  | Dom.   |
| WF | FIT-DNA 50-80, 1 | 11320 | 0    | 0 | 3622 | 383 | 67 | 34 | -4.1%  | Dom.   |
| WF | FIT-DNA 50-85, 1 | 11927 | 0    | 0 | 3715 | 386 | 68 | 35 | -3.7%  | Dom.   |
| WF | FIT-DNA 45-75, 1 | 12627 | 0    | 0 | 3902 | 395 | 66 | 33 | -2.0%  | 178.8* |
| WF | FIT-DNA 45-80, 1 | 13492 | 0    | 0 | 4043 | 404 | 69 | 35 | -0.4%  | 82.8*  |
| WF | FIT-DNA 45-85, 1 | 14096 | 0    | 0 | 4135 | 407 | 70 | 35 | 0%     | 74.0   |
| WF | HSgFOBT 55-75, 3 | 4968  | 0    | 0 | 1466 | 227 | 29 | 20 | -16.2% | Dom.   |
| WF | HSgFOBT 55-80, 3 | 5814  | 0    | 0 | 1611 | 247 | 32 | 24 | -14.5% | Dom.   |
| WF | HSgFOBT 55-85, 3 | 6382  | 0    | 0 | 1698 | 254 | 31 | 25 | -14.9% | Dom.   |
| WF | HSgFOBT 50-75, 3 | 6317  | 0    | 0 | 1763 | 260 | 33 | 23 | -14.9% | Dom.   |
| WF | HSgFOBT 50-80, 3 | 7098  | 0    | 0 | 1892 | 277 | 35 | 25 | -13.3% | Dom.   |
| WF | HSgFOBT 50-85, 3 | 7387  | 0    | 0 | 1936 | 281 | 35 | 26 | -13.3% | Dom.   |
| WF | HSgFOBT 45-75, 3 | 7695  | 0    | 0 | 2019 | 283 | 36 | 24 | -14.8% | Dom.   |
| WF | HSgFOBT 45-80, 3 | 8091  | 0    | 0 | 2082 | 291 | 37 | 25 | -13.8% | Dom.   |
| WF | HSgFOBT 45-85, 3 | 8686  | 0    | 0 | 2171 | 300 | 37 | 27 | -13.1% | Dom.   |
| WF | HSgFOBT 55-75, 2 | 6922  | 0    | 0 | 1896 | 271 | 38 | 25 | -15.2% | Dom.   |
| WF | HSgFOBT 55-80, 2 | 7615  | 0    | 0 | 2002 | 283 | 40 | 27 | -14.3% | Dom.   |
| WF | HSgFOBT 55-85, 2 | 8347  | 0    | 0 | 2104 | 290 | 41 | 28 | -14.6% | Dom.   |
| WF | HSgFOBT 50-75, 2 | 8325  | 0    | 0 | 2203 | 301 | 42 | 26 | -13.3% | Dom.   |
| WF | HSgFOBT 50-80, 2 | 9334  | 0    | 0 | 2353 | 318 | 44 | 29 | -10.9% | Dom.   |
| WF | HSgFOBT 50-85, 2 | 9811  | 0    | 0 | 2417 | 322 | 45 | 30 | -10.7% | Dom.   |
| WF | HSgFOBT 45-75, 2 | 10188 | 0    | 0 | 2526 | 325 | 45 | 28 | -11.4% | Dom.   |
| WF | HSgFOBT 45-80, 2 | 10851 | 0    | 0 | 2623 | 336 | 46 | 29 | -10.0% | Dom.   |
| WF | HSgFOBT 45-85, 2 | 11557 | 0    | 0 | 2718 | 343 | 47 | 31 | -9.6%  | Dom.   |
| WF | HSgFOBT 55-75, 1 | 10189 | 0    | 0 | 2569 | 317 | 52 | 29 | -14.3% | Dom.   |
| WF | HSgFOBT 55-80, 1 | 11322 | 0    | 0 | 2717 | 328 | 54 | 31 | -13.4% | Dom.   |
| WF | HSgFOBT 55-85, 1 | 12110 | 0    | 0 | 2810 | 332 | 55 | 32 | -13.7% | Dom.   |
| WF | HSgFOBT 50-75, 1 | 12523 | 0    | 0 | 3012 | 351 | 56 | 31 | -10.3% | Dom.   |
| WF | HSgFOBT 50-80, 1 | 13634 | 0    | 0 | 3153 | 362 | 58 | 32 | -8.0%  | Dom.   |
| WF | HSgFOBT 50-85, 1 | 14407 | 0    | 0 | 3243 | 366 | 59 | 33 | -7.3%  | Dom.   |
| WF | HSgFOBT 45-75, 1 | 15026 | 0    | 0 | 3402 | 372 | 58 | 31 | -6.1%  | Dom.   |
| WF | HSgFOBT 45-80, 1 | 16121 | 0    | 0 | 3539 | 383 | 60 | 33 | -4.0%  | Dom.   |
| WF | HSgFOBT 45-85, 1 | 16886 | 0    | 0 | 3628 | 387 | 61 | 34 | -3.3%  | Dom.   |
| WF | SIG 55-75, 10    | 0     | 1985 | 0 | 2935 | 310 | 62 | 30 | 0%     | 9.1    |
| WF | SIG 55-80, 10    | 0     | 1985 | 0 | 2935 | 310 | 62 | 30 | 0%     | 9.1    |
| WF | SIG 55-85, 10    | 0     | 2181 | 0 | 3034 | 312 | 62 | 30 | -2.6%  | Dom.   |
| WF | SIG 50-75, 10    | 0     | 2198 | 0 | 3132 | 331 | 62 | 30 | 0%     | 9.4    |
| WF | SIG 50-80, 10    | 0     | 2492 | 0 | 3307 | 339 | 65 | 32 | -0.7%  | 20.4*  |
| WF | SIG 50-85, 10    | 0     | 2492 | 0 | 3307 | 339 | 65 | 32 | -0.7%  | 20.4*  |
| WF | SIG 45-75, 10    | 0     | 2795 | 0 | 3466 | 350 | 65 | 31 | -0.5%  | 17.0*  |
| WF | SIG 45-80, 10    | 0     | 2795 | 0 | 3466 | 350 | 65 | 31 | -0.5%  | 17.0*  |
| WF | SIG 45-85, 10    | 0     | 2989 | 0 | 3564 | 353 | 66 | 32 | -1.5%  | 19.7*  |
| WF | SIG 55-75, 5     | 0     | 2673 | 0 | 3229 | 331 | 66 | 31 | -1.9%  | Dom.   |
| WF | SIG 55-80, 5     | 0     | 2894 | 0 | 3327 | 334 | 67 | 32 | -2.6%  | Dom.   |
| WF | SIG 55-85, 5     | 0     | 3035 | 0 | 3376 | 335 | 67 | 32 | -3.2%  | Dom.   |

|    |               |   |      |      |      |     |    |    |       |       |
|----|---------------|---|------|------|------|-----|----|----|-------|-------|
| WF | SIG 50-75, 5  | 0 | 3300 | 0    | 3618 | 362 | 69 | 33 | 0%    | 15.7  |
| WF | SIG 50-80, 5  | 0 | 3520 | 0    | 3715 | 366 | 70 | 33 | -0.4% | 25.0* |
| WF | SIG 50-85, 5  | 0 | 3661 | 0    | 3763 | 366 | 70 | 34 | -0.9% | 31.1* |
| WF | SIG 45-75, 5  | 0 | 4005 | 0    | 3930 | 379 | 70 | 33 | 0%    | 17.8  |
| WF | SIG 45-80, 5  | 0 | 4224 | 0    | 4026 | 383 | 72 | 34 | 0%    | 25.1  |
| WF | SIG 45-85, 5  | 0 | 4365 | 0    | 4075 | 384 | 72 | 34 | 0%    | 60.2  |
| WF | CTC 55-75, 10 | 0 | 0    | 2275 | 1761 | 258 | 43 | 24 | 0%    | 6.4   |
| WF | CTC 55-80, 10 | 0 | 0    | 2275 | 1761 | 258 | 43 | 24 | 0%    | 6.4   |
| WF | CTC 55-85, 10 | 0 | 0    | 2567 | 1863 | 264 | 45 | 26 | -2.8% | Dom.  |
| WF | CTC 50-75, 10 | 0 | 0    | 2471 | 1838 | 269 | 42 | 23 | 0%    | 7.2   |
| WF | CTC 50-80, 10 | 0 | 0    | 2894 | 1996 | 288 | 46 | 27 | -0.3% | 8.2*  |
| WF | CTC 50-85, 10 | 0 | 0    | 2894 | 1996 | 288 | 46 | 27 | -0.3% | 8.2*  |
| WF | CTC 45-75, 10 | 0 | 0    | 3178 | 2074 | 291 | 46 | 26 | -2.7% | Dom.  |
| WF | CTC 45-80, 10 | 0 | 0    | 3178 | 2074 | 291 | 46 | 26 | -2.7% | Dom.  |
| WF | CTC 45-85, 10 | 0 | 0    | 3467 | 2174 | 297 | 47 | 27 | -4.7% | Dom.  |
| WF | CTC 55-75, 5  | 0 | 0    | 3309 | 2162 | 310 | 54 | 29 | 0%    | 7.8   |
| WF | CTC 55-80, 5  | 0 | 0    | 3644 | 2259 | 319 | 57 | 30 | -0.5% | 10.4* |
| WF | CTC 55-85, 5  | 0 | 0    | 3870 | 2319 | 322 | 58 | 31 | -1.7% | 13.0* |
| WF | CTC 50-75, 5  | 0 | 0    | 4058 | 2431 | 340 | 57 | 30 | 0%    | 8.9   |
| WF | CTC 50-80, 5  | 0 | 0    | 4389 | 2525 | 349 | 60 | 32 | 0%    | 10.5  |
| WF | CTC 50-85, 5  | 0 | 0    | 4613 | 2584 | 352 | 61 | 32 | -0.6% | 22.1* |
| WF | CTC 45-75, 5  | 0 | 0    | 4853 | 2652 | 358 | 58 | 31 | -0.4% | 14.1* |
| WF | CTC 45-80, 5  | 0 | 0    | 5182 | 2745 | 367 | 61 | 32 | 0%    | 12.2  |
| WF | CTC 45-85, 5  | 0 | 0    | 5405 | 2803 | 370 | 62 | 33 | 0%    | 22.3  |

**SimCRC - Scenario 1: Stable CRC risk**

|    |               |   |   |   |      |     |    |    |        |        |
|----|---------------|---|---|---|------|-----|----|----|--------|--------|
| WF | No screening  | 0 | 0 | 0 | 66   | 0   | 0  | 0  | -      | -      |
| WF | COL 55-75, 15 | 0 | 0 | 0 | 3001 | 229 | 48 | 21 | 0%     | 12.8   |
| WF | COL 55-80, 15 | 0 | 0 | 0 | 3001 | 229 | 48 | 21 | 0%     | 12.8   |
| WF | COL 55-85, 15 | 0 | 0 | 0 | 3384 | 230 | 48 | 21 | -12.1% | Dom.   |
| WF | COL 50-75, 15 | 0 | 0 | 0 | 3178 | 255 | 50 | 21 | 0%     | 6.6    |
| WF | COL 50-80, 15 | 0 | 0 | 0 | 3745 | 261 | 52 | 22 | -4.5%  | Dom.   |
| WF | COL 50-85, 15 | 0 | 0 | 0 | 3745 | 261 | 52 | 22 | -4.5%  | Dom.   |
| WF | COL 45-75, 15 | 0 | 0 | 0 | 4062 | 283 | 55 | 23 | 0%     | 31.6   |
| WF | COL 45-80, 15 | 0 | 0 | 0 | 4062 | 283 | 55 | 23 | 0%     | 31.6   |
| WF | COL 45-85, 15 | 0 | 0 | 0 | 4062 | 283 | 55 | 23 | 0%     | 31.6   |
| WF | COL 55-75, 10 | 0 | 0 | 0 | 3746 | 239 | 51 | 22 | -12.6% | Dom.   |
| WF | COL 55-80, 10 | 0 | 0 | 0 | 3746 | 239 | 51 | 22 | -12.6% | Dom.   |
| WF | COL 55-85, 10 | 0 | 0 | 0 | 4080 | 240 | 51 | 22 | -15.5% | Dom.   |
| WF | COL 50-75, 10 | 0 | 0 | 0 | 4062 | 270 | 54 | 23 | -4.7%  | Dom.   |
| WF | COL 50-80, 10 | 0 | 0 | 0 | 4555 | 273 | 55 | 23 | -6.3%  | Dom.   |
| WF | COL 50-85, 10 | 0 | 0 | 0 | 4555 | 273 | 55 | 23 | -6.3%  | Dom.   |
| WF | COL 45-75, 10 | 0 | 0 | 0 | 4952 | 297 | 58 | 24 | 0%     | 64.8   |
| WF | COL 45-80, 10 | 0 | 0 | 0 | 4952 | 297 | 58 | 24 | 0%     | 64.8   |
| WF | COL 45-85, 10 | 0 | 0 | 0 | 5286 | 298 | 58 | 24 | -0.2%  | 511.6* |
| WF | COL 55-75, 5  | 0 | 0 | 0 | 5172 | 246 | 53 | 22 | -17.5% | Dom.   |
| WF | COL 55-80, 5  | 0 | 0 | 0 | 5592 | 247 | 54 | 22 | -17.7% | Dom.   |

|    |                  |       |   |   |      |     |    |    |        |        |
|----|------------------|-------|---|---|------|-----|----|----|--------|--------|
| WF | COL 55-85, 5     | 0     | 0 | 0 | 5881 | 247 | 54 | 22 | -18.0% | Dom.   |
| WF | COL 50-75, 5     | 0     | 0 | 0 | 6217 | 280 | 58 | 24 | -7.2%  | Dom.   |
| WF | COL 50-80, 5     | 0     | 0 | 0 | 6637 | 281 | 58 | 24 | -7.5%  | Dom.   |
| WF | COL 50-85, 5     | 0     | 0 | 0 | 6925 | 281 | 58 | 24 | -7.8%  | Dom.   |
| WF | COL 45-75, 5     | 0     | 0 | 0 | 7272 | 306 | 61 | 24 | 0%     | 248.3  |
| WF | COL 45-80, 5     | 0     | 0 | 0 | 7692 | 307 | 61 | 25 | 0%     | 597.2  |
| WF | COL 45-85, 5     | 0     | 0 | 0 | 7980 | 307 | 61 | 25 | 0%     | 1998.2 |
| WF | FIT 55-75, 3     | 5618  | 0 | 0 | 760  | 176 | 24 | 15 | 0%     | 3.9    |
| WF | FIT 55-80, 3     | 6735  | 0 | 0 | 863  | 188 | 26 | 17 | -4.8%  | Dom.   |
| WF | FIT 55-85, 3     | 7460  | 0 | 0 | 928  | 191 | 26 | 18 | -9.0%  | Dom.   |
| WF | FIT 50-75, 3     | 7252  | 0 | 0 | 915  | 208 | 28 | 17 | 0%     | 4.8    |
| WF | FIT 50-80, 3     | 8207  | 0 | 0 | 1003 | 217 | 30 | 18 | -3.1%  | Dom.   |
| WF | FIT 50-85, 3     | 8728  | 0 | 0 | 1048 | 220 | 30 | 19 | -5.3%  | Dom.   |
| WF | FIT 45-75, 3     | 8777  | 0 | 0 | 1046 | 232 | 31 | 18 | 0%     | 5.4    |
| WF | FIT 45-80, 3     | 9458  | 0 | 0 | 1104 | 239 | 32 | 19 | 0%     | 9.0    |
| WF | FIT 45-85, 3     | 10289 | 0 | 0 | 1176 | 243 | 32 | 20 | -0.5%  | 16.2*  |
| WF | FIT 55-75, 2     | 8126  | 0 | 0 | 1003 | 200 | 30 | 17 | -10.6% | Dom.   |
| WF | FIT 55-80, 2     | 9124  | 0 | 0 | 1085 | 207 | 32 | 18 | -12.5% | Dom.   |
| WF | FIT 55-85, 2     | 10249 | 0 | 0 | 1173 | 211 | 32 | 19 | -13.7% | Dom.   |
| WF | FIT 50-75, 2     | 9840  | 0 | 0 | 1154 | 230 | 34 | 18 | -5.3%  | Dom.   |
| WF | FIT 50-80, 2     | 11322 | 0 | 0 | 1272 | 239 | 36 | 20 | -5.1%  | Dom.   |
| WF | FIT 50-85, 2     | 12069 | 0 | 0 | 1330 | 241 | 36 | 21 | -5.9%  | Dom.   |
| WF | FIT 45-75, 2     | 12158 | 0 | 0 | 1333 | 257 | 38 | 20 | 0%     | 12.5   |
| WF | FIT 45-80, 2     | 13143 | 0 | 0 | 1412 | 263 | 39 | 21 | 0%     | 12.9   |
| WF | FIT 45-85, 2     | 14258 | 0 | 0 | 1498 | 266 | 39 | 22 | 0%     | 24.2   |
| WF | FIT 55-75, 1     | 13408 | 0 | 0 | 1428 | 221 | 39 | 19 | -16.0% | Dom.   |
| WF | FIT 55-80, 1     | 15410 | 0 | 0 | 1563 | 227 | 41 | 20 | -15.6% | Dom.   |
| WF | FIT 55-85, 1     | 16903 | 0 | 0 | 1658 | 229 | 41 | 21 | -15.9% | Dom.   |
| WF | FIT 50-75, 1     | 16764 | 0 | 0 | 1680 | 254 | 44 | 21 | -6.8%  | Dom.   |
| WF | FIT 50-80, 1     | 18753 | 0 | 0 | 1811 | 260 | 45 | 22 | -6.5%  | Dom.   |
| WF | FIT 50-85, 1     | 20240 | 0 | 0 | 1905 | 262 | 46 | 22 | -6.9%  | Dom.   |
| WF | FIT 45-75, 1     | 20234 | 0 | 0 | 1911 | 281 | 47 | 22 | -0.2%  | 28.5*  |
| WF | FIT 45-80, 1     | 22216 | 0 | 0 | 2041 | 286 | 48 | 23 | 0%     | 27.7   |
| WF | FIT 45-85, 1     | 23698 | 0 | 0 | 2134 | 288 | 49 | 23 | 0%     | 53.5   |
| WF | FIT-DNA 55-75, 5 | 3809  | 0 | 0 | 1133 | 191 | 30 | 17 | -20.6% | Dom.   |
| WF | FIT-DNA 55-80, 5 | 4285  | 0 | 0 | 1227 | 197 | 31 | 18 | -20.8% | Dom.   |
| WF | FIT-DNA 55-85, 5 | 4624  | 0 | 0 | 1291 | 198 | 31 | 18 | -21.7% | Dom.   |
| WF | FIT-DNA 50-75, 5 | 4638  | 0 | 0 | 1318 | 221 | 34 | 18 | -13.6% | Dom.   |
| WF | FIT-DNA 50-80, 5 | 5111  | 0 | 0 | 1410 | 226 | 35 | 19 | -14.0% | Dom.   |
| WF | FIT-DNA 50-85, 5 | 5449  | 0 | 0 | 1474 | 228 | 35 | 20 | -14.2% | Dom.   |
| WF | FIT-DNA 45-75, 5 | 5489  | 0 | 0 | 1486 | 243 | 37 | 19 | -8.6%  | Dom.   |
| WF | FIT-DNA 45-80, 5 | 5960  | 0 | 0 | 1577 | 248 | 38 | 20 | -7.8%  | Dom.   |
| WF | FIT-DNA 45-85, 5 | 6297  | 0 | 0 | 1640 | 250 | 38 | 20 | -8.0%  | Dom.   |
| WF | FIT-DNA 55-75, 3 | 4965  | 0 | 0 | 1372 | 210 | 36 | 18 | -19.1% | Dom.   |
| WF | FIT-DNA 55-80, 3 | 5851  | 0 | 0 | 1533 | 218 | 38 | 20 | -18.6% | Dom.   |
| WF | FIT-DNA 55-85, 3 | 6349  | 0 | 0 | 1619 | 220 | 38 | 20 | -18.8% | Dom.   |

|    |                  |       |      |   |      |     |    |    |        |        |
|----|------------------|-------|------|---|------|-----|----|----|--------|--------|
| WF | FIT-DNA 50-75, 3 | 6335  | 0    | 0 | 1651 | 245 | 41 | 20 | -10.1% | Dom.   |
| WF | FIT-DNA 50-80, 3 | 6999  | 0    | 0 | 1771 | 250 | 42 | 21 | -9.5%  | Dom.   |
| WF | FIT-DNA 50-85, 3 | 7529  | 0    | 0 | 1859 | 252 | 42 | 21 | -9.8%  | Dom.   |
| WF | FIT-DNA 45-75, 3 | 7510  | 0    | 0 | 1869 | 269 | 44 | 21 | -3.9%  | Dom.   |
| WF | FIT-DNA 45-80, 3 | 8214  | 0    | 0 | 1990 | 274 | 45 | 22 | -3.5%  | Dom.   |
| WF | FIT-DNA 45-85, 3 | 8812  | 0    | 0 | 2093 | 277 | 46 | 22 | -3.6%  | Dom.   |
| WF | FIT-DNA 55-75, 1 | 9509  | 0    | 0 | 2190 | 232 | 46 | 21 | -19.4% | Dom.   |
| WF | FIT-DNA 55-80, 1 | 10771 | 0    | 0 | 2376 | 236 | 47 | 21 | -18.6% | Dom.   |
| WF | FIT-DNA 55-85, 1 | 11726 | 0    | 0 | 2510 | 237 | 48 | 22 | -18.5% | Dom.   |
| WF | FIT-DNA 50-75, 1 | 11755 | 0    | 0 | 2576 | 265 | 50 | 22 | -8.8%  | Dom.   |
| WF | FIT-DNA 50-80, 1 | 13042 | 0    | 0 | 2764 | 269 | 52 | 23 | -8.0%  | Dom.   |
| WF | FIT-DNA 50-85, 1 | 13987 | 0    | 0 | 2897 | 270 | 52 | 23 | -7.9%  | Dom.   |
| WF | FIT-DNA 45-75, 1 | 14124 | 0    | 0 | 2946 | 291 | 53 | 23 | -0.7%  | 239.9* |
| WF | FIT-DNA 45-80, 1 | 15396 | 0    | 0 | 3132 | 294 | 55 | 24 | 0.0%   | 153.1* |
| WF | FIT-DNA 45-85, 1 | 16340 | 0    | 0 | 3264 | 295 | 55 | 24 | 0%     | 149.8  |
| WF | HSgFOBT 55-75, 3 | 5303  | 0    | 0 | 1022 | 176 | 26 | 15 | -22.9% | Dom.   |
| WF | HSgFOBT 55-80, 3 | 6312  | 0    | 0 | 1157 | 187 | 27 | 17 | -23.2% | Dom.   |
| WF | HSgFOBT 55-85, 3 | 6912  | 0    | 0 | 1235 | 190 | 28 | 18 | -23.8% | Dom.   |
| WF | HSgFOBT 50-75, 3 | 6794  | 0    | 0 | 1249 | 209 | 30 | 17 | -16.5% | Dom.   |
| WF | HSgFOBT 50-80, 3 | 7584  | 0    | 0 | 1355 | 217 | 32 | 18 | -16.1% | Dom.   |
| WF | HSgFOBT 50-85, 3 | 8135  | 0    | 0 | 1423 | 219 | 32 | 19 | -16.7% | Dom.   |
| WF | HSgFOBT 45-75, 3 | 8097  | 0    | 0 | 1434 | 233 | 33 | 18 | -11.8% | Dom.   |
| WF | HSgFOBT 45-80, 3 | 8821  | 0    | 0 | 1525 | 239 | 34 | 19 | -10.6% | Dom.   |
| WF | HSgFOBT 45-85, 3 | 9533  | 0    | 0 | 1615 | 243 | 35 | 20 | -10.3% | Dom.   |
| WF | HSgFOBT 55-75, 2 | 7342  | 0    | 0 | 1337 | 200 | 32 | 18 | -22.1% | Dom.   |
| WF | HSgFOBT 55-80, 2 | 8205  | 0    | 0 | 1444 | 206 | 33 | 19 | -21.9% | Dom.   |
| WF | HSgFOBT 55-85, 2 | 9173  | 0    | 0 | 1559 | 210 | 34 | 19 | -22.0% | Dom.   |
| WF | HSgFOBT 50-75, 2 | 8835  | 0    | 0 | 1559 | 231 | 36 | 19 | -14.1% | Dom.   |
| WF | HSgFOBT 50-80, 2 | 10114 | 0    | 0 | 1715 | 239 | 38 | 20 | -12.9% | Dom.   |
| WF | HSgFOBT 50-85, 2 | 10756 | 0    | 0 | 1790 | 241 | 38 | 21 | -13.0% | Dom.   |
| WF | HSgFOBT 45-75, 2 | 10852 | 0    | 0 | 1824 | 258 | 40 | 20 | -7.2%  | Dom.   |
| WF | HSgFOBT 45-80, 2 | 11701 | 0    | 0 | 1928 | 263 | 41 | 21 | -6.6%  | Dom.   |
| WF | HSgFOBT 45-85, 2 | 12658 | 0    | 0 | 2039 | 266 | 41 | 22 | -6.8%  | Dom.   |
| WF | HSgFOBT 55-75, 1 | 11066 | 0    | 0 | 1857 | 222 | 40 | 20 | -20.6% | Dom.   |
| WF | HSgFOBT 55-80, 1 | 12609 | 0    | 0 | 2029 | 227 | 42 | 20 | -20.6% | Dom.   |
| WF | HSgFOBT 55-85, 1 | 13763 | 0    | 0 | 2151 | 228 | 42 | 21 | -20.7% | Dom.   |
| WF | HSgFOBT 50-75, 1 | 13679 | 0    | 0 | 2204 | 255 | 45 | 21 | -11.5% | Dom.   |
| WF | HSgFOBT 50-80, 1 | 15223 | 0    | 0 | 2373 | 260 | 47 | 22 | -10.2% | Dom.   |
| WF | HSgFOBT 50-85, 1 | 16369 | 0    | 0 | 2493 | 261 | 47 | 22 | -9.9%  | Dom.   |
| WF | HSgFOBT 45-75, 1 | 16396 | 0    | 0 | 2530 | 282 | 49 | 22 | -3.1%  | Dom.   |
| WF | HSgFOBT 45-80, 1 | 17931 | 0    | 0 | 2698 | 286 | 50 | 23 | -1.9%  | Dom.   |
| WF | HSgFOBT 45-85, 1 | 19074 | 0    | 0 | 2818 | 288 | 50 | 23 | -1.7%  | Dom.   |
| WF | SIG 55-75, 10    | 0     | 2431 | 0 | 1214 | 168 | 35 | 15 | 0%     | 6.8    |
| WF | SIG 55-80, 10    | 0     | 2431 | 0 | 1214 | 168 | 35 | 15 | 0%     | 6.8    |
| WF | SIG 55-85, 10    | 0     | 2805 | 0 | 1317 | 170 | 35 | 16 | -12.4% | Dom.   |
| WF | SIG 50-75, 10    | 0     | 2595 | 0 | 1277 | 190 | 37 | 16 | 0%     | 2.9    |

|    |               |   |      |      |      |     |    |    |        |       |
|----|---------------|---|------|------|------|-----|----|----|--------|-------|
| WF | SIG 50-80, 10 | 0 | 3115 | 0    | 1429 | 195 | 39 | 17 | -5.1%  | Dom.  |
| WF | SIG 50-85, 10 | 0 | 3115 | 0    | 1429 | 195 | 39 | 17 | -5.1%  | Dom.  |
| WF | SIG 45-75, 10 | 0 | 3359 | 0    | 1510 | 214 | 41 | 17 | 0%     | 9.7   |
| WF | SIG 45-80, 10 | 0 | 3359 | 0    | 1510 | 214 | 41 | 17 | 0%     | 9.7   |
| WF | SIG 45-85, 10 | 0 | 3732 | 0    | 1612 | 216 | 41 | 18 | -1.9%  | 64.1* |
| WF | SIG 55-75, 5  | 0 | 3583 | 0    | 1530 | 187 | 40 | 17 | -13.1% | Dom.  |
| WF | SIG 55-80, 5  | 0 | 4013 | 0    | 1633 | 189 | 40 | 18 | -14.3% | Dom.  |
| WF | SIG 55-85, 5  | 0 | 4318 | 0    | 1702 | 190 | 41 | 18 | -15.5% | Dom.  |
| WF | SIG 50-75, 5  | 0 | 4369 | 0    | 1761 | 216 | 44 | 19 | -5.1%  | Dom.  |
| WF | SIG 50-80, 5  | 0 | 4796 | 0    | 1864 | 219 | 44 | 19 | -6.5%  | Dom.  |
| WF | SIG 50-85, 5  | 0 | 5099 | 0    | 1932 | 219 | 45 | 19 | -7.7%  | Dom.  |
| WF | SIG 45-75, 5  | 0 | 5179 | 0    | 1973 | 240 | 46 | 20 | 0%     | 17.8  |
| WF | SIG 45-80, 5  | 0 | 5604 | 0    | 2074 | 242 | 47 | 20 | 0%     | 45.7  |
| WF | SIG 45-85, 5  | 0 | 5907 | 0    | 2142 | 243 | 47 | 20 | 0%     | 108.9 |
| WF | CTC 55-75, 10 | 0 | 0    | 2407 | 1323 | 209 | 42 | 19 | 0%     | 6.0   |
| WF | CTC 55-80, 10 | 0 | 0    | 2407 | 1323 | 209 | 42 | 19 | 0%     | 6.0   |
| WF | CTC 55-85, 10 | 0 | 0    | 2769 | 1440 | 211 | 42 | 20 | -12.6% | Dom.  |
| WF | CTC 50-75, 10 | 0 | 0    | 2578 | 1371 | 234 | 44 | 19 | 0%     | 2.0   |
| WF | CTC 50-80, 10 | 0 | 0    | 3085 | 1540 | 240 | 46 | 21 | -5.2%  | Dom.  |
| WF | CTC 50-85, 10 | 0 | 0    | 3085 | 1540 | 240 | 46 | 21 | -5.2%  | Dom.  |
| WF | CTC 45-75, 10 | 0 | 0    | 3336 | 1608 | 261 | 48 | 21 | 0%     | 8.6   |
| WF | CTC 45-80, 10 | 0 | 0    | 3336 | 1608 | 261 | 48 | 21 | 0%     | 8.6   |
| WF | CTC 45-85, 10 | 0 | 0    | 3696 | 1723 | 263 | 48 | 22 | -1.6%  | 60.8* |
| WF | CTC 55-75, 5  | 0 | 0    | 3548 | 1626 | 226 | 47 | 20 | -13.8% | Dom.  |
| WF | CTC 55-80, 5  | 0 | 0    | 3966 | 1733 | 228 | 48 | 21 | -14.7% | Dom.  |
| WF | CTC 55-85, 5  | 0 | 0    | 4260 | 1804 | 229 | 48 | 21 | -15.6% | Dom.  |
| WF | CTC 50-75, 5  | 0 | 0    | 4341 | 1848 | 259 | 51 | 22 | -5.4%  | Dom.  |
| WF | CTC 50-80, 5  | 0 | 0    | 4757 | 1954 | 261 | 52 | 22 | -6.4%  | Dom.  |
| WF | CTC 50-85, 5  | 0 | 0    | 5051 | 2025 | 262 | 52 | 22 | -7.4%  | Dom.  |
| WF | CTC 45-75, 5  | 0 | 0    | 5163 | 2045 | 284 | 53 | 23 | 0%     | 19.0  |
| WF | CTC 45-80, 5  | 0 | 0    | 5579 | 2150 | 287 | 55 | 23 | 0%     | 44.3  |
| WF | CTC 45-85, 5  | 0 | 0    | 5872 | 2221 | 287 | 55 | 23 | 0%     | 109.8 |

#### SimCRC - Scenario 2: Increased CRC risk

|    |               |   |   |   |      |     |    |    |       |      |
|----|---------------|---|---|---|------|-----|----|----|-------|------|
| WF | No screening  | 0 | 0 | 0 | 120  | 0   | 0  | 0  | -     | -    |
| WF | COL 55-75, 15 | 0 | 0 | 0 | 3181 | 370 | 82 | 35 | 0%    | 8.3  |
| WF | COL 55-80, 15 | 0 | 0 | 0 | 3181 | 370 | 82 | 35 | 0%    | 8.3  |
| WF | COL 55-85, 15 | 0 | 0 | 0 | 3540 | 375 | 84 | 36 | -8.1% | Dom. |
| WF | COL 50-75, 15 | 0 | 0 | 0 | 3300 | 396 | 80 | 34 | 0%    | 4.7  |
| WF | COL 50-80, 15 | 0 | 0 | 0 | 3889 | 414 | 88 | 38 | -2.6% | Dom. |
| WF | COL 50-85, 15 | 0 | 0 | 0 | 3889 | 414 | 88 | 38 | -2.6% | Dom. |
| WF | COL 45-75, 15 | 0 | 0 | 0 | 4218 | 442 | 91 | 39 | 0%    | 19.9 |
| WF | COL 45-80, 15 | 0 | 0 | 0 | 4218 | 442 | 91 | 39 | 0%    | 19.9 |
| WF | COL 45-85, 15 | 0 | 0 | 0 | 4218 | 442 | 91 | 39 | 0%    | 19.9 |
| WF | COL 55-75, 10 | 0 | 0 | 0 | 3943 | 397 | 90 | 38 | -7.3% | Dom. |
| WF | COL 55-80, 10 | 0 | 0 | 0 | 3943 | 397 | 90 | 38 | -7.3% | Dom. |
| WF | COL 55-85, 10 | 0 | 0 | 0 | 4228 | 399 | 91 | 39 | -9.8% | Dom. |



|    |                  |       |   |   |      |     |     |    |        |        |
|----|------------------|-------|---|---|------|-----|-----|----|--------|--------|
| WF | COL 50-75, 10    | 0     | 0 | 0 | 4254 | 434 | 92  | 38 | -2.2%  | Dom.   |
| WF | COL 50-80, 10    | 0     | 0 | 0 | 4723 | 442 | 97  | 40 | -3.6%  | Dom.   |
| WF | COL 50-85, 10    | 0     | 0 | 0 | 4723 | 442 | 97  | 40 | -3.6%  | Dom.   |
| WF | COL 45-75, 10    | 0     | 0 | 0 | 5138 | 473 | 99  | 41 | 0%     | 29.4   |
| WF | COL 45-80, 10    | 0     | 0 | 0 | 5138 | 473 | 99  | 41 | 0%     | 29.4   |
| WF | COL 45-85, 10    | 0     | 0 | 0 | 5424 | 475 | 100 | 41 | -0.1%  | 142.9* |
| WF | COL 55-75, 5     | 0     | 0 | 0 | 5343 | 413 | 96  | 39 | -13.0% | Dom.   |
| WF | COL 55-80, 5     | 0     | 0 | 0 | 5695 | 416 | 97  | 40 | -13.1% | Dom.   |
| WF | COL 55-85, 5     | 0     | 0 | 0 | 5914 | 416 | 98  | 40 | -13.4% | Dom.   |
| WF | COL 50-75, 5     | 0     | 0 | 0 | 6393 | 461 | 101 | 41 | -5.0%  | Dom.   |
| WF | COL 50-80, 5     | 0     | 0 | 0 | 6745 | 463 | 103 | 42 | -5.2%  | Dom.   |
| WF | COL 50-85, 5     | 0     | 0 | 0 | 6964 | 463 | 104 | 42 | -5.5%  | Dom.   |
| WF | COL 45-75, 5     | 0     | 0 | 0 | 7453 | 495 | 105 | 42 | 0%     | 106.6  |
| WF | COL 45-80, 5     | 0     | 0 | 0 | 7805 | 497 | 107 | 43 | 0%     | 146.4  |
| WF | COL 45-85, 5     | 0     | 0 | 0 | 8024 | 498 | 107 | 43 | 0%     | 472.9  |
| WF | FIT 55-75, 3     | 5566  | 0 | 0 | 871  | 271 | 39  | 23 | 0%     | 2.8    |
| WF | FIT 55-80, 3     | 6627  | 0 | 0 | 1002 | 299 | 43  | 28 | -3.1%  | Dom.   |
| WF | FIT 55-85, 3     | 7289  | 0 | 0 | 1084 | 308 | 44  | 30 | -6.7%  | Dom.   |
| WF | FIT 50-75, 3     | 7200  | 0 | 0 | 1027 | 316 | 45  | 26 | 0%     | 3.5    |
| WF | FIT 50-80, 3     | 8106  | 0 | 0 | 1140 | 338 | 48  | 30 | -1.9%  | 5.1*   |
| WF | FIT 50-85, 3     | 8582  | 0 | 0 | 1196 | 345 | 49  | 31 | -3.5%  | Dom.   |
| WF | FIT 45-75, 3     | 8732  | 0 | 0 | 1155 | 348 | 48  | 28 | 0%     | 3.9    |
| WF | FIT 45-80, 3     | 9380  | 0 | 0 | 1229 | 364 | 51  | 30 | 0%     | 4.8    |
| WF | FIT 45-85, 3     | 10143 | 0 | 0 | 1322 | 375 | 52  | 33 | -0.4%  | 8.3*   |
| WF | FIT 55-75, 2     | 8025  | 0 | 0 | 1140 | 318 | 50  | 28 | -7.8%  | Dom.   |
| WF | FIT 55-80, 2     | 8961  | 0 | 0 | 1244 | 335 | 54  | 31 | -8.5%  | Dom.   |
| WF | FIT 55-85, 2     | 9972  | 0 | 0 | 1353 | 345 | 55  | 33 | -9.5%  | Dom.   |
| WF | FIT 50-75, 2     | 9766  | 0 | 0 | 1279 | 354 | 54  | 29 | -4.5%  | Dom.   |
| WF | FIT 50-80, 2     | 11159 | 0 | 0 | 1430 | 379 | 59  | 33 | -3.4%  | Dom.   |
| WF | FIT 50-85, 2     | 11831 | 0 | 0 | 1501 | 385 | 60  | 35 | -4.2%  | Dom.   |
| WF | FIT 45-75, 2     | 12090 | 0 | 0 | 1459 | 393 | 59  | 32 | -0.6%  | 7.9*   |
| WF | FIT 45-80, 2     | 13017 | 0 | 0 | 1560 | 410 | 63  | 34 | 0%     | 7.3    |
| WF | FIT 45-85, 2     | 14022 | 0 | 0 | 1666 | 419 | 64  | 36 | 0%     | 11.2   |
| WF | FIT 55-75, 1     | 13210 | 0 | 0 | 1595 | 360 | 66  | 33 | -12.8% | Dom.   |
| WF | FIT 55-80, 1     | 15050 | 0 | 0 | 1759 | 376 | 71  | 35 | -11.5% | Dom.   |
| WF | FIT 55-85, 1     | 16349 | 0 | 0 | 1869 | 381 | 72  | 37 | -11.7% | Dom.   |
| WF | FIT 50-75, 1     | 16603 | 0 | 0 | 1840 | 405 | 72  | 35 | -5.8%  | Dom.   |
| WF | FIT 50-80, 1     | 18435 | 0 | 0 | 2002 | 421 | 76  | 37 | -4.4%  | Dom.   |
| WF | FIT 50-85, 1     | 19730 | 0 | 0 | 2111 | 426 | 78  | 39 | -4.7%  | Dom.   |
| WF | FIT 45-75, 1     | 20115 | 0 | 0 | 2064 | 439 | 76  | 36 | -1.3%  | 20.1*  |
| WF | FIT 45-80, 1     | 21941 | 0 | 0 | 2225 | 455 | 81  | 39 | 0%     | 15.6   |
| WF | FIT 45-85, 1     | 23235 | 0 | 0 | 2333 | 460 | 82  | 40 | 0%     | 20.2   |
| WF | FIT-DNA 55-75, 5 | 3770  | 0 | 0 | 1267 | 300 | 50  | 27 | -18.7% | Dom.   |
| WF | FIT-DNA 55-80, 5 | 4216  | 0 | 0 | 1380 | 314 | 53  | 30 | -18.4% | Dom.   |
| WF | FIT-DNA 55-85, 5 | 4519  | 0 | 0 | 1456 | 319 | 53  | 31 | -19.4% | Dom.   |
| WF | FIT-DNA 50-75, 5 | 4607  | 0 | 0 | 1446 | 340 | 55  | 29 | -13.8% | Dom.   |

|    |                  |       |   |   |      |     |    |    |        |       |
|----|------------------|-------|---|---|------|-----|----|----|--------|-------|
| WF | FIT-DNA 50-80, 5 | 5050  | 0 | 0 | 1557 | 353 | 58 | 32 | -13.8% | Dom.  |
| WF | FIT-DNA 50-85, 5 | 5353  | 0 | 0 | 1632 | 357 | 58 | 33 | -14.1% | Dom.  |
| WF | FIT-DNA 45-75, 5 | 5466  | 0 | 0 | 1607 | 368 | 59 | 30 | -10.9% | Dom.  |
| WF | FIT-DNA 45-80, 5 | 5908  | 0 | 0 | 1718 | 381 | 62 | 33 | -9.7%  | Dom.  |
| WF | FIT-DNA 45-85, 5 | 6210  | 0 | 0 | 1792 | 386 | 62 | 34 | -9.6%  | Dom.  |
| WF | FIT-DNA 55-75, 3 | 4916  | 0 | 0 | 1516 | 334 | 59 | 30 | -17.1% | Dom.  |
| WF | FIT-DNA 55-80, 3 | 5745  | 0 | 0 | 1710 | 356 | 65 | 34 | -15.6% | Dom.  |
| WF | FIT-DNA 55-85, 3 | 6187  | 0 | 0 | 1809 | 361 | 66 | 35 | -15.6% | Dom.  |
| WF | FIT-DNA 50-75, 3 | 6293  | 0 | 0 | 1796 | 383 | 66 | 33 | -10.4% | Dom.  |
| WF | FIT-DNA 50-80, 3 | 6913  | 0 | 0 | 1940 | 398 | 70 | 35 | -8.8%  | Dom.  |
| WF | FIT-DNA 50-85, 3 | 7385  | 0 | 0 | 2041 | 404 | 72 | 37 | -8.8%  | Dom.  |
| WF | FIT-DNA 45-75, 3 | 7484  | 0 | 0 | 2003 | 414 | 70 | 34 | -6.1%  | Dom.  |
| WF | FIT-DNA 45-80, 3 | 8144  | 0 | 0 | 2150 | 430 | 74 | 36 | -4.5%  | Dom.  |
| WF | FIT-DNA 45-85, 3 | 8679  | 0 | 0 | 2268 | 437 | 76 | 38 | -4.4%  | Dom.  |
| WF | FIT-DNA 55-75, 1 | 9367  | 0 | 0 | 2380 | 381 | 79 | 35 | -17.3% | Dom.  |
| WF | FIT-DNA 55-80, 1 | 10505 | 0 | 0 | 2587 | 392 | 83 | 37 | -15.4% | Dom.  |
| WF | FIT-DNA 55-85, 1 | 11311 | 0 | 0 | 2724 | 395 | 84 | 38 | -15.0% | Dom.  |
| WF | FIT-DNA 50-75, 1 | 11653 | 0 | 0 | 2757 | 426 | 84 | 37 | -8.4%  | Dom.  |
| WF | FIT-DNA 50-80, 1 | 12814 | 0 | 0 | 2968 | 438 | 89 | 39 | -6.5%  | Dom.  |
| WF | FIT-DNA 50-85, 1 | 13612 | 0 | 0 | 3104 | 441 | 90 | 40 | -6.2%  | Dom.  |
| WF | FIT-DNA 45-75, 1 | 14057 | 0 | 0 | 3120 | 460 | 88 | 38 | -2.1%  | Dom.  |
| WF | FIT-DNA 45-80, 1 | 15206 | 0 | 0 | 3328 | 471 | 93 | 40 | -0.3%  | 90.1* |
| WF | FIT-DNA 45-85, 1 | 16003 | 0 | 0 | 3464 | 474 | 94 | 41 | 0%     | 79.4  |
| WF | HSgFOBT 55-75, 3 | 5256  | 0 | 0 | 1136 | 273 | 42 | 24 | -20.6% | Dom.  |
| WF | HSgFOBT 55-80, 3 | 6215  | 0 | 0 | 1295 | 299 | 47 | 28 | -20.0% | Dom.  |
| WF | HSgFOBT 55-85, 3 | 6764  | 0 | 0 | 1384 | 306 | 47 | 30 | -20.5% | Dom.  |
| WF | HSgFOBT 50-75, 3 | 6751  | 0 | 0 | 1361 | 319 | 48 | 27 | -16.5% | Dom.  |
| WF | HSgFOBT 50-80, 3 | 7502  | 0 | 0 | 1486 | 338 | 52 | 30 | -15.3% | Dom.  |
| WF | HSgFOBT 50-85, 3 | 8005  | 0 | 0 | 1564 | 345 | 53 | 31 | -15.8% | Dom.  |
| WF | HSgFOBT 45-75, 3 | 8066  | 0 | 0 | 1539 | 350 | 52 | 28 | -13.9% | Dom.  |
| WF | HSgFOBT 45-80, 3 | 8756  | 0 | 0 | 1646 | 367 | 55 | 31 | -12.2% | Dom.  |
| WF | HSgFOBT 45-85, 3 | 9411  | 0 | 0 | 1751 | 376 | 56 | 33 | -11.4% | Dom.  |
| WF | HSgFOBT 55-75, 2 | 7259  | 0 | 0 | 1475 | 319 | 54 | 29 | -19.8% | Dom.  |
| WF | HSgFOBT 55-80, 2 | 8070  | 0 | 0 | 1600 | 334 | 57 | 31 | -19.1% | Dom.  |
| WF | HSgFOBT 55-85, 2 | 8941  | 0 | 0 | 1728 | 343 | 58 | 33 | -18.9% | Dom.  |
| WF | HSgFOBT 50-75, 2 | 8779  | 0 | 0 | 1684 | 357 | 58 | 30 | -15.0% | Dom.  |
| WF | HSgFOBT 50-80, 2 | 9986  | 0 | 0 | 1866 | 379 | 63 | 34 | -12.3% | Dom.  |
| WF | HSgFOBT 50-85, 2 | 10564 | 0 | 0 | 1950 | 384 | 64 | 35 | -12.1% | Dom.  |
| WF | HSgFOBT 45-75, 2 | 10808 | 0 | 0 | 1945 | 396 | 63 | 32 | -9.4%  | Dom.  |
| WF | HSgFOBT 45-80, 2 | 11610 | 0 | 0 | 2067 | 411 | 67 | 35 | -7.7%  | Dom.  |
| WF | HSgFOBT 45-85, 2 | 12474 | 0 | 0 | 2192 | 419 | 68 | 37 | -7.5%  | Dom.  |
| WF | HSgFOBT 55-75, 1 | 10925 | 0 | 0 | 2021 | 360 | 68 | 33 | -18.4% | Dom.  |
| WF | HSgFOBT 55-80, 1 | 12351 | 0 | 0 | 2214 | 375 | 73 | 36 | -17.4% | Dom.  |
| WF | HSgFOBT 55-85, 1 | 13357 | 0 | 0 | 2342 | 380 | 74 | 37 | -17.5% | Dom.  |
| WF | HSgFOBT 50-75, 1 | 13579 | 0 | 0 | 2358 | 406 | 75 | 35 | -11.7% | Dom.  |
| WF | HSgFOBT 50-80, 1 | 15008 | 0 | 0 | 2550 | 421 | 79 | 38 | -9.1%  | Dom.  |

|    |                  |       |      |      |      |     |    |    |        |       |
|----|------------------|-------|------|------|------|-----|----|----|--------|-------|
| WF | HSgFOBT 50-85, 1 | 16010 | 0    | 0    | 2677 | 425 | 80 | 39 | -8.4%  | Dom.  |
| WF | HSgFOBT 45-75, 1 | 16337 | 0    | 0    | 2676 | 440 | 79 | 36 | -5.2%  | Dom.  |
| WF | HSgFOBT 45-80, 1 | 17759 | 0    | 0    | 2866 | 454 | 83 | 39 | -2.7%  | Dom.  |
| WF | HSgFOBT 45-85, 1 | 18759 | 0    | 0    | 2994 | 459 | 84 | 40 | -2.0%  | Dom.  |
| WF | SIG 55-75, 10    | 0     | 2334 | 0    | 1783 | 347 | 77 | 33 | 0%     | 4.8   |
| WF | SIG 55-80, 10    | 0     | 2334 | 0    | 1783 | 347 | 77 | 33 | 0%     | 4.8   |
| WF | SIG 55-85, 10    | 0     | 2629 | 0    | 1924 | 351 | 78 | 34 | -10.2% | Dom.  |
| WF | SIG 50-75, 10    | 0     | 2530 | 0    | 1808 | 375 | 77 | 33 | 0%     | 0.9   |
| WF | SIG 50-80, 10    | 0     | 2971 | 0    | 2040 | 389 | 83 | 36 | -4.5%  | Dom.  |
| WF | SIG 50-85, 10    | 0     | 2971 | 0    | 2040 | 389 | 83 | 36 | -4.5%  | Dom.  |
| WF | SIG 45-75, 10    | 0     | 3257 | 0    | 2103 | 416 | 85 | 36 | 0%     | 7.2   |
| WF | SIG 45-80, 10    | 0     | 3257 | 0    | 2103 | 416 | 85 | 36 | 0%     | 7.2   |
| WF | SIG 45-85, 10    | 0     | 3551 | 0    | 2243 | 420 | 86 | 37 | -1.3%  | 37.4* |
| WF | SIG 55-75, 5     | 0     | 3352 | 0    | 2108 | 370 | 83 | 35 | -11.1% | Dom.  |
| WF | SIG 55-80, 5     | 0     | 3690 | 0    | 2240 | 375 | 86 | 36 | -11.6% | Dom.  |
| WF | SIG 55-85, 5     | 0     | 3913 | 0    | 2319 | 377 | 86 | 37 | -12.4% | Dom.  |
| WF | SIG 50-75, 5     | 0     | 4129 | 0    | 2352 | 413 | 88 | 37 | -4.5%  | Dom.  |
| WF | SIG 50-80, 5     | 0     | 4465 | 0    | 2483 | 418 | 91 | 38 | -5.1%  | Dom.  |
| WF | SIG 50-85, 5     | 0     | 4688 | 0    | 2562 | 419 | 92 | 39 | -5.9%  | Dom.  |
| WF | SIG 45-75, 5     | 0     | 4937 | 0    | 2567 | 446 | 92 | 38 | 0%     | 15.5  |
| WF | SIG 45-80, 5     | 0     | 5274 | 0    | 2698 | 451 | 95 | 39 | 0%     | 25.0  |
| WF | SIG 45-85, 5     | 0     | 5496 | 0    | 2777 | 453 | 95 | 40 | 0%     | 59.7  |
| WF | CTC 55-75, 10    | 0     | 0    | 2386 | 1507 | 338 | 71 | 32 | 0%     | 4.1   |
| WF | CTC 55-80, 10    | 0     | 0    | 2386 | 1507 | 338 | 71 | 32 | 0%     | 4.1   |
| WF | CTC 55-85, 10    | 0     | 0    | 2707 | 1656 | 343 | 73 | 34 | -10.8% | Dom.  |
| WF | CTC 50-75, 10    | 0     | 0    | 2574 | 1510 | 361 | 70 | 31 | 0%     | 0.1   |
| WF | CTC 50-80, 10    | 0     | 0    | 3049 | 1738 | 379 | 77 | 35 | -4.6%  | Dom.  |
| WF | CTC 50-85, 10    | 0     | 0    | 3049 | 1738 | 379 | 77 | 35 | -4.6%  | Dom.  |
| WF | CTC 45-75, 10    | 0     | 0    | 3325 | 1780 | 405 | 79 | 35 | 0%     | 6.2   |
| WF | CTC 45-80, 10    | 0     | 0    | 3325 | 1780 | 405 | 79 | 35 | 0%     | 6.2   |
| WF | CTC 45-85, 10    | 0     | 0    | 3646 | 1927 | 410 | 81 | 36 | -2.1%  | Dom.  |
| WF | CTC 55-75, 5     | 0     | 0    | 3500 | 1841 | 373 | 81 | 35 | -9.2%  | Dom.  |
| WF | CTC 55-80, 5     | 0     | 0    | 3874 | 1976 | 380 | 84 | 37 | -10.3% | Dom.  |
| WF | CTC 55-85, 5     | 0     | 0    | 4121 | 2060 | 382 | 85 | 37 | -11.5% | Dom.  |
| WF | CTC 50-75, 5     | 0     | 0    | 4302 | 2057 | 416 | 86 | 37 | -3.5%  | Dom.  |
| WF | CTC 50-80, 5     | 0     | 0    | 4675 | 2192 | 423 | 89 | 38 | -4.6%  | Dom.  |
| WF | CTC 50-85, 5     | 0     | 0    | 4922 | 2275 | 425 | 90 | 39 | -5.7%  | Dom.  |
| WF | CTC 45-75, 5     | 0     | 0    | 5134 | 2248 | 449 | 89 | 38 | 0%     | 10.4  |
| WF | CTC 45-80, 5     | 0     | 0    | 5507 | 2382 | 457 | 93 | 40 | 0%     | 18.2  |
| WF | CTC 45-85, 5     | 0     | 0    | 5754 | 2465 | 459 | 94 | 40 | 0%     | 45.7  |

Abbreviations: COL = colonoscopy; CRC = colorectal cancer; CTC = computed tomographic colonography; Dom. = dominated strategy; ER = efficiency ratio; FIT = fecal immunochemical test; FIT-DNA = multitarget stool DNA test; HSgFOBT = high-sensitivity guaiac-based fecal occult blood test; LYG = life-years gained; SIG = flexible sigmoidoscopy; WF = white female.

<sup>a</sup> Both models evaluated two scenarios for CRC risk: one in which age-specific risks were assumed to have remained stable since the early screening period in the U.S. (1975-1979 for SimCRC; 1990-1994 for MISCAN), and one in which risks were assumed to have increased proportional to observed trends among adults under age 40 years. Strategies for each model and scenario are ordered successively by screening modality, interval (↓), end age (↑), and start age (↓).

<sup>b</sup> Total number of colonoscopies performed per 1000 40-year-olds, including diagnostic colonoscopies and potential surveillance colonoscopies after adenoma removal. The number of screening-related complications ranged from 3.5 to 27.6 per 1000 40-year-olds across models, scenarios, and strategies.

<sup>c</sup> Including deaths from complications of screening.

<sup>d</sup> The difference in LYG compared to (combinations of) adjacent strategies on the efficient frontier. Near-efficient strategies have a loss in LYG of less than 2% before rounding. For the least intensive screening strategy evaluated within each class of screening modality, the difference was zero by definition.

<sup>e</sup> Efficiency ratio = incremental number of colonoscopies/LYG with respect to the next less effective strategy on the efficient frontier, a burden-to-benefit ratio. Only calculated for efficient and near-efficient strategies (marked with an asterisk\*), i.e. strategies within 2% from the efficient frontier among all evaluated strategies within a class of screening modalities (colonoscopy, stool-based, sigmoidoscopy, and CTC).

**Supplementary Table 4. Lifetime Number of Colonoscopies and LYG for All Evaluated Screening Strategies under Two Scenarios for CRC Risk, by Model, in Black Females <sup>a</sup>**

| Sub-group                                   | Modality, and age to begin-end screening, interval, y | Outcomes per 1000 40-year-olds |      |      |                   |     |                   |                                 | Relative distance from efficient frontier <sup>d</sup> | ER <sup>e</sup> |
|---------------------------------------------|-------------------------------------------------------|--------------------------------|------|------|-------------------|-----|-------------------|---------------------------------|--------------------------------------------------------|-----------------|
|                                             |                                                       | Stool tests                    | SIGs | CTCs | COLs <sup>b</sup> | LYG | CRC cases averted | CRC deaths averted <sup>c</sup> |                                                        |                 |
| <b>MISCAN - Scenario 1: Stable CRC risk</b> |                                                       |                                |      |      |                   |     |                   |                                 |                                                        |                 |
| BF                                          | No screening                                          | 0                              | 0    | 0    | 60                | 0   | 0                 | 0                               | -                                                      | -               |
| BF                                          | COL 55-75, 15                                         | 0                              | 0    | 0    | 3037              | 227 | 34                | 20                              | 0%                                                     | 13.1            |
| BF                                          | COL 55-80, 15                                         | 0                              | 0    | 0    | 3037              | 227 | 34                | 20                              | 0%                                                     | 13.1            |
| BF                                          | COL 55-85, 15                                         | 0                              | 0    | 0    | 3322              | 228 | 34                | 21                              | -7.1%                                                  | Dom.            |
| BF                                          | COL 50-75, 15                                         | 0                              | 0    | 0    | 3327              | 246 | 35                | 21                              | 0%                                                     | 15.0            |
| BF                                          | COL 50-80, 15                                         | 0                              | 0    | 0    | 3746              | 251 | 36                | 22                              | -2.3%                                                  | Dom.            |
| BF                                          | COL 50-85, 15                                         | 0                              | 0    | 0    | 3746              | 251 | 36                | 22                              | -2.3%                                                  | Dom.            |
| BF                                          | COL 45-75, 15                                         | 0                              | 0    | 0    | 4101              | 266 | 37                | 22                              | -0.4%                                                  | Dom.            |
| BF                                          | COL 45-80, 15                                         | 0                              | 0    | 0    | 4101              | 266 | 37                | 22                              | -0.4%                                                  | Dom.            |
| BF                                          | COL 45-85, 15                                         | 0                              | 0    | 0    | 4101              | 266 | 37                | 22                              | -0.4%                                                  | Dom.            |
| BF                                          | COL 55-75, 10                                         | 0                              | 0    | 0    | 3646              | 239 | 36                | 21                              | -6.2%                                                  | Dom.            |
| BF                                          | COL 55-80, 10                                         | 0                              | 0    | 0    | 3646              | 239 | 36                | 21                              | -6.2%                                                  | Dom.            |
| BF                                          | COL 55-85, 10                                         | 0                              | 0    | 0    | 3908              | 240 | 37                | 22                              | -8.4%                                                  | Dom.            |
| BF                                          | COL 50-75, 10                                         | 0                              | 0    | 0    | 4060              | 266 | 38                | 22                              | 0%                                                     | 37.7            |
| BF                                          | COL 50-80, 10                                         | 0                              | 0    | 0    | 4439              | 268 | 39                | 23                              | -2.2%                                                  | Dom.            |
| BF                                          | COL 50-85, 10                                         | 0                              | 0    | 0    | 4439              | 268 | 39                | 23                              | -2.2%                                                  | Dom.            |
| BF                                          | COL 45-75, 10                                         | 0                              | 0    | 0    | 4894              | 285 | 40                | 23                              | 0%                                                     | 43.4            |
| BF                                          | COL 45-80, 10                                         | 0                              | 0    | 0    | 4894              | 285 | 40                | 23                              | 0%                                                     | 43.4            |
| BF                                          | COL 45-85, 10                                         | 0                              | 0    | 0    | 5155              | 286 | 40                | 23                              | -0.6%                                                  | 348.0*          |
| BF                                          | COL 55-75, 5                                          | 0                              | 0    | 0    | 4864              | 251 | 39                | 22                              | -11.5%                                                 | Dom.            |
| BF                                          | COL 55-80, 5                                          | 0                              | 0    | 0    | 5209              | 252 | 39                | 22                              | -12.3%                                                 | Dom.            |
| BF                                          | COL 55-85, 5                                          | 0                              | 0    | 0    | 5454              | 253 | 39                | 23                              | -13.0%                                                 | Dom.            |
| BF                                          | COL 50-75, 5                                          | 0                              | 0    | 0    | 5888              | 283 | 41                | 24                              | -3.9%                                                  | Dom.            |
| BF                                          | COL 50-80, 5                                          | 0                              | 0    | 0    | 6234              | 284 | 42                | 24                              | -4.6%                                                  | Dom.            |
| BF                                          | COL 50-85, 5                                          | 0                              | 0    | 0    | 6479              | 284 | 42                | 24                              | -5.3%                                                  | Dom.            |
| BF                                          | COL 45-75, 5                                          | 0                              | 0    | 0    | 6930              | 304 | 43                | 24                              | 0%                                                     | 104.0           |
| BF                                          | COL 45-80, 5                                          | 0                              | 0    | 0    | 7276              | 305 | 44                | 25                              | 0%                                                     | 370.5           |
| BF                                          | COL 45-85, 5                                          | 0                              | 0    | 0    | 7520              | 306 | 44                | 25                              | 0%                                                     | 950.9           |
| BF                                          | FIT 55-75, 3                                          | 5191                           | 0    | 0    | 825               | 161 | 15                | 14                              | 0%                                                     | 4.8             |
| BF                                          | FIT 55-80, 3                                          | 6137                           | 0    | 0    | 906               | 172 | 16                | 16                              | -0.8%                                                  | 7.1*            |
| BF                                          | FIT 55-85, 3                                          | 6798                           | 0    | 0    | 955               | 176 | 16                | 16                              | -3.0%                                                  | Dom.            |
| BF                                          | FIT 50-75, 3                                          | 6726                           | 0    | 0    | 991               | 187 | 17                | 15                              | 0%                                                     | 6.3             |
| BF                                          | FIT 50-80, 3                                          | 7618                           | 0    | 0    | 1063              | 196 | 18                | 17                              | 0.0%                                                   | 7.8*            |
| BF                                          | FIT 50-85, 3                                          | 7959                           | 0    | 0    | 1088              | 198 | 18                | 17                              | -0.6%                                                  | 8.7*            |
| BF                                          | FIT 45-75, 3                                          | 8297                           | 0    | 0    | 1136              | 205 | 19                | 16                              | -0.2%                                                  | 7.9*            |
| BF                                          | FIT 45-80, 3                                          | 8752                           | 0    | 0    | 1171              | 210 | 19                | 17                              | 0%                                                     | 7.8             |
| BF                                          | FIT 45-85, 3                                          | 9454                           | 0    | 0    | 1222              | 214 | 19                | 18                              | -0.3%                                                  | 11.9*           |

|    |                  |       |   |   |      |     |    |    |        |        |
|----|------------------|-------|---|---|------|-----|----|----|--------|--------|
| BF | FIT 55-75, 2     | 7554  | 0 | 0 | 1063 | 188 | 19 | 16 | -4.2%  | Dom.   |
| BF | FIT 55-80, 2     | 8406  | 0 | 0 | 1124 | 194 | 20 | 18 | -4.7%  | Dom.   |
| BF | FIT 55-85, 2     | 9351  | 0 | 0 | 1185 | 198 | 20 | 18 | -6.2%  | Dom.   |
| BF | FIT 50-75, 2     | 9240  | 0 | 0 | 1237 | 213 | 22 | 18 | -1.3%  | Dom.   |
| BF | FIT 50-80, 2     | 10503 | 0 | 0 | 1324 | 223 | 23 | 19 | -0.7%  | 11.9*  |
| BF | FIT 50-85, 2     | 11128 | 0 | 0 | 1364 | 225 | 23 | 19 | -1.4%  | 12.7*  |
| BF | FIT 45-75, 2     | 11477 | 0 | 0 | 1422 | 233 | 23 | 19 | -0.3%  | 10.8*  |
| BF | FIT 45-80, 2     | 12314 | 0 | 0 | 1480 | 239 | 24 | 19 | 0%     | 10.5   |
| BF | FIT 45-85, 2     | 13246 | 0 | 0 | 1538 | 243 | 24 | 20 | 0%     | 16.7   |
| BF | FIT 55-75, 1     | 12431 | 0 | 0 | 1469 | 217 | 26 | 19 | -9.0%  | Dom.   |
| BF | FIT 55-80, 1     | 14150 | 0 | 0 | 1567 | 223 | 27 | 20 | -8.5%  | Dom.   |
| BF | FIT 55-85, 1     | 15418 | 0 | 0 | 1633 | 226 | 28 | 20 | -9.0%  | Dom.   |
| BF | FIT 50-75, 1     | 15658 | 0 | 0 | 1743 | 246 | 29 | 20 | -3.1%  | Dom.   |
| BF | FIT 50-80, 1     | 17357 | 0 | 0 | 1837 | 252 | 30 | 21 | -2.7%  | Dom.   |
| BF | FIT 50-85, 1     | 18615 | 0 | 0 | 1902 | 255 | 30 | 22 | -3.1%  | Dom.   |
| BF | FIT 45-75, 1     | 19041 | 0 | 0 | 1988 | 267 | 30 | 21 | -0.4%  | 18.8*  |
| BF | FIT 45-80, 1     | 20731 | 0 | 0 | 2080 | 273 | 31 | 22 | 0%     | 18.0   |
| BF | FIT 45-85, 1     | 21984 | 0 | 0 | 2144 | 275 | 32 | 22 | 0%     | 28.8   |
| BF | FIT-DNA 55-75, 5 | 3535  | 0 | 0 | 1192 | 181 | 20 | 16 | -14.6% | Dom.   |
| BF | FIT-DNA 55-80, 5 | 3935  | 0 | 0 | 1261 | 186 | 20 | 17 | -14.9% | Dom.   |
| BF | FIT-DNA 55-85, 5 | 4214  | 0 | 0 | 1306 | 188 | 20 | 17 | -15.8% | Dom.   |
| BF | FIT-DNA 50-75, 5 | 4336  | 0 | 0 | 1397 | 205 | 22 | 17 | -11.4% | Dom.   |
| BF | FIT-DNA 50-80, 5 | 4731  | 0 | 0 | 1464 | 210 | 22 | 18 | -11.7% | Dom.   |
| BF | FIT-DNA 50-85, 5 | 5008  | 0 | 0 | 1508 | 212 | 22 | 19 | -12.2% | Dom.   |
| BF | FIT-DNA 45-75, 5 | 5168  | 0 | 0 | 1578 | 221 | 23 | 18 | -9.8%  | Dom.   |
| BF | FIT-DNA 45-80, 5 | 5561  | 0 | 0 | 1644 | 226 | 24 | 19 | -9.3%  | Dom.   |
| BF | FIT-DNA 45-85, 5 | 5836  | 0 | 0 | 1687 | 227 | 23 | 19 | -9.5%  | Dom.   |
| BF | FIT-DNA 55-75, 3 | 4457  | 0 | 0 | 1412 | 200 | 24 | 17 | -14.3% | Dom.   |
| BF | FIT-DNA 55-80, 3 | 5203  | 0 | 0 | 1533 | 208 | 25 | 19 | -14.0% | Dom.   |
| BF | FIT-DNA 55-85, 3 | 5719  | 0 | 0 | 1609 | 211 | 25 | 19 | -14.4% | Dom.   |
| BF | FIT-DNA 50-75, 3 | 5716  | 0 | 0 | 1700 | 230 | 27 | 19 | -8.7%  | Dom.   |
| BF | FIT-DNA 50-80, 3 | 6415  | 0 | 0 | 1810 | 237 | 28 | 20 | -8.1%  | Dom.   |
| BF | FIT-DNA 50-85, 3 | 6681  | 0 | 0 | 1848 | 238 | 28 | 20 | -8.3%  | Dom.   |
| BF | FIT-DNA 45-75, 3 | 7012  | 0 | 0 | 1960 | 250 | 28 | 20 | -6.2%  | Dom.   |
| BF | FIT-DNA 45-80, 3 | 7369  | 0 | 0 | 2014 | 253 | 29 | 21 | -5.9%  | Dom.   |
| BF | FIT-DNA 45-85, 3 | 7917  | 0 | 0 | 2093 | 256 | 29 | 21 | -6.2%  | Dom.   |
| BF | FIT-DNA 55-75, 1 | 8771  | 0 | 0 | 2215 | 233 | 32 | 20 | -15.4% | Dom.   |
| BF | FIT-DNA 55-80, 1 | 9839  | 0 | 0 | 2352 | 237 | 33 | 21 | -14.4% | Dom.   |
| BF | FIT-DNA 55-85, 1 | 10642 | 0 | 0 | 2451 | 239 | 34 | 21 | -14.3% | Dom.   |
| BF | FIT-DNA 50-75, 1 | 10898 | 0 | 0 | 2632 | 263 | 35 | 22 | -6.2%  | Dom.   |
| BF | FIT-DNA 50-80, 1 | 11980 | 0 | 0 | 2770 | 267 | 36 | 22 | -5.3%  | Dom.   |
| BF | FIT-DNA 50-85, 1 | 12773 | 0 | 0 | 2866 | 269 | 36 | 23 | -5.2%  | Dom.   |
| BF | FIT-DNA 45-75, 1 | 13174 | 0 | 0 | 3023 | 283 | 37 | 23 | -0.8%  | 112.0* |
| BF | FIT-DNA 45-80, 1 | 14243 | 0 | 0 | 3158 | 287 | 38 | 23 | 0.0%   | 87.2*  |
| BF | FIT-DNA 45-85, 1 | 15035 | 0 | 0 | 3254 | 288 | 38 | 23 | 0%     | 86.5   |
| BF | HSgFOBT 55-75, 3 | 4861  | 0 | 0 | 1043 | 159 | 16 | 14 | -17.9% | Dom.   |

|    |                  |       |      |      |      |     |    |    |        |       |
|----|------------------|-------|------|------|------|-----|----|----|--------|-------|
| BF | HSgFOBT 55-80, 3 | 5715  | 0    | 0    | 1150 | 169 | 16 | 16 | -18.2% | Dom.  |
| BF | HSgFOBT 55-85, 3 | 6309  | 0    | 0    | 1218 | 173 | 16 | 16 | -19.3% | Dom.  |
| BF | HSgFOBT 50-75, 3 | 6243  | 0    | 0    | 1283 | 186 | 18 | 16 | -15.8% | Dom.  |
| BF | HSgFOBT 50-80, 3 | 7042  | 0    | 0    | 1380 | 194 | 19 | 17 | -15.4% | Dom.  |
| BF | HSgFOBT 50-85, 3 | 7347  | 0    | 0    | 1414 | 196 | 19 | 17 | -15.8% | Dom.  |
| BF | HSgFOBT 45-75, 3 | 7649  | 0    | 0    | 1502 | 205 | 20 | 17 | -15.0% | Dom.  |
| BF | HSgFOBT 45-80, 3 | 8056  | 0    | 0    | 1550 | 209 | 20 | 17 | -14.1% | Dom.  |
| BF | HSgFOBT 45-85, 3 | 8681  | 0    | 0    | 1619 | 213 | 20 | 18 | -13.9% | Dom.  |
| BF | HSgFOBT 55-75, 2 | 6865  | 0    | 0    | 1363 | 187 | 20 | 17 | -18.0% | Dom.  |
| BF | HSgFOBT 55-80, 2 | 7600  | 0    | 0    | 1447 | 193 | 21 | 18 | -18.2% | Dom.  |
| BF | HSgFOBT 55-85, 2 | 8409  | 0    | 0    | 1531 | 197 | 21 | 18 | -18.9% | Dom.  |
| BF | HSgFOBT 50-75, 2 | 8325  | 0    | 0    | 1619 | 213 | 23 | 18 | -13.7% | Dom.  |
| BF | HSgFOBT 50-80, 2 | 9408  | 0    | 0    | 1738 | 222 | 24 | 19 | -12.7% | Dom.  |
| BF | HSgFOBT 50-85, 2 | 9941  | 0    | 0    | 1793 | 224 | 24 | 20 | -12.9% | Dom.  |
| BF | HSgFOBT 45-75, 2 | 10252 | 0    | 0    | 1899 | 234 | 25 | 19 | -10.9% | Dom.  |
| BF | HSgFOBT 45-80, 2 | 10967 | 0    | 0    | 1977 | 239 | 25 | 20 | -10.4% | Dom.  |
| BF | HSgFOBT 45-85, 2 | 11759 | 0    | 0    | 2058 | 242 | 25 | 20 | -10.7% | Dom.  |
| BF | HSgFOBT 55-75, 1 | 10314 | 0    | 0    | 1880 | 217 | 27 | 19 | -17.3% | Dom.  |
| BF | HSgFOBT 55-80, 1 | 11617 | 0    | 0    | 2009 | 222 | 28 | 20 | -17.4% | Dom.  |
| BF | HSgFOBT 55-85, 1 | 12578 | 0    | 0    | 2099 | 224 | 28 | 20 | -18.1% | Dom.  |
| BF | HSgFOBT 50-75, 1 | 12793 | 0    | 0    | 2259 | 246 | 30 | 21 | -10.9% | Dom.  |
| BF | HSgFOBT 50-80, 1 | 14086 | 0    | 0    | 2385 | 251 | 31 | 21 | -9.5%  | Dom.  |
| BF | HSgFOBT 50-85, 1 | 15037 | 0    | 0    | 2473 | 253 | 31 | 22 | -9.2%  | Dom.  |
| BF | HSgFOBT 45-75, 1 | 15400 | 0    | 0    | 2611 | 266 | 32 | 21 | -5.0%  | Dom.  |
| BF | HSgFOBT 45-80, 1 | 16681 | 0    | 0    | 2735 | 271 | 33 | 22 | -3.8%  | Dom.  |
| BF | HSgFOBT 45-85, 1 | 17627 | 0    | 0    | 2822 | 273 | 33 | 22 | -3.5%  | Dom.  |
| BF | SIG 55-75, 10    | 0     | 2181 | 0    | 1527 | 176 | 27 | 16 | 0%     | 8.3   |
| BF | SIG 55-80, 10    | 0     | 2181 | 0    | 1527 | 176 | 27 | 16 | 0%     | 8.3   |
| BF | SIG 55-85, 10    | 0     | 2471 | 0    | 1593 | 177 | 27 | 17 | -3.9%  | Dom.  |
| BF | SIG 50-75, 10    | 0     | 2377 | 0    | 1669 | 194 | 28 | 17 | 0%     | 8.0   |
| BF | SIG 50-80, 10    | 0     | 2786 | 0    | 1772 | 198 | 29 | 17 | -1.2%  | 26.0* |
| BF | SIG 50-85, 10    | 0     | 2786 | 0    | 1772 | 198 | 29 | 17 | -1.2%  | 26.0* |
| BF | SIG 45-75, 10    | 0     | 3060 | 0    | 1905 | 208 | 30 | 18 | -0.4%  | 17.3* |
| BF | SIG 45-80, 10    | 0     | 3060 | 0    | 1905 | 208 | 30 | 18 | -0.4%  | 17.3* |
| BF | SIG 45-85, 10    | 0     | 3348 | 0    | 1969 | 209 | 30 | 18 | -1.7%  | 20.3* |
| BF | SIG 55-75, 5     | 0     | 3162 | 0    | 1801 | 195 | 30 | 18 | -3.7%  | Dom.  |
| BF | SIG 55-80, 5     | 0     | 3504 | 0    | 1869 | 196 | 30 | 18 | -4.8%  | Dom.  |
| BF | SIG 55-85, 5     | 0     | 3745 | 0    | 1914 | 197 | 30 | 18 | -5.8%  | Dom.  |
| BF | SIG 50-75, 5     | 0     | 3884 | 0    | 2085 | 219 | 32 | 19 | -0.4%  | 17.0* |
| BF | SIG 50-80, 5     | 0     | 4223 | 0    | 2152 | 220 | 32 | 19 | -1.5%  | 18.4* |
| BF | SIG 50-85, 5     | 0     | 4463 | 0    | 2197 | 221 | 32 | 19 | -2.4%  | Dom.  |
| BF | SIG 45-75, 5     | 0     | 4650 | 0    | 2333 | 235 | 33 | 20 | 0%     | 16.4  |
| BF | SIG 45-80, 5     | 0     | 4988 | 0    | 2399 | 236 | 34 | 20 | 0%     | 40.0  |
| BF | SIG 45-85, 5     | 0     | 5226 | 0    | 2443 | 237 | 34 | 20 | 0%     | 87.2  |
| BF | CTC 55-75, 10    | 0     | 0    | 2259 | 1218 | 183 | 24 | 17 | 0%     | 6.3   |
| BF | CTC 55-80, 10    | 0     | 0    | 2259 | 1218 | 183 | 24 | 17 | 0%     | 6.3   |

|    |               |   |   |      |      |     |    |    |       |       |
|----|---------------|---|---|------|------|-----|----|----|-------|-------|
| BF | CTC 55-85, 10 | 0 | 0 | 2570 | 1288 | 186 | 24 | 17 | -5.3% | Dom.  |
| BF | CTC 50-75, 10 | 0 | 0 | 2460 | 1301 | 199 | 24 | 17 | 0%    | 5.4   |
| BF | CTC 50-80, 10 | 0 | 0 | 2900 | 1407 | 208 | 26 | 18 | -0.6% | 11.5* |
| BF | CTC 50-85, 10 | 0 | 0 | 2900 | 1407 | 208 | 26 | 18 | -0.6% | 11.5* |
| BF | CTC 45-75, 10 | 0 | 0 | 3179 | 1490 | 215 | 26 | 18 | -1.1% | 11.5* |
| BF | CTC 45-80, 10 | 0 | 0 | 3179 | 1490 | 215 | 26 | 18 | -1.1% | 11.5* |
| BF | CTC 45-85, 10 | 0 | 0 | 3488 | 1559 | 218 | 27 | 19 | -2.8% | Dom.  |
| BF | CTC 55-75, 5  | 0 | 0 | 3347 | 1512 | 216 | 29 | 19 | -1.7% | 12.3* |
| BF | CTC 55-80, 5  | 0 | 0 | 3717 | 1584 | 220 | 30 | 20 | -3.0% | Dom.  |
| BF | CTC 55-85, 5  | 0 | 0 | 3977 | 1631 | 221 | 31 | 20 | -4.4% | Dom.  |
| BF | CTC 50-75, 5  | 0 | 0 | 4122 | 1739 | 242 | 31 | 20 | 0%    | 10.1  |
| BF | CTC 50-80, 5  | 0 | 0 | 4490 | 1810 | 246 | 32 | 21 | -0.9% | 17.5* |
| BF | CTC 50-85, 5  | 0 | 0 | 4748 | 1856 | 248 | 33 | 21 | -2.0% | 22.4* |
| BF | CTC 45-75, 5  | 0 | 0 | 4935 | 1937 | 260 | 33 | 21 | 0%    | 11.4  |
| BF | CTC 45-80, 5  | 0 | 0 | 5301 | 2007 | 264 | 34 | 22 | 0%    | 17.6  |
| BF | CTC 45-85, 5  | 0 | 0 | 5559 | 2053 | 265 | 34 | 22 | 0%    | 39.7  |

**MISCAN - Scenario 2: Increased CRC risk**

|    |               |      |   |   |      |     |    |    |        |        |
|----|---------------|------|---|---|------|-----|----|----|--------|--------|
| BF | No screening  | 0    | 0 | 0 | 77   | 0   | 0  | 0  | -      | -      |
| BF | COL 55-75, 15 | 0    | 0 | 0 | 3375 | 292 | 44 | 26 | 0%     | 11.3   |
| BF | COL 55-80, 15 | 0    | 0 | 0 | 3375 | 292 | 44 | 26 | 0%     | 11.3   |
| BF | COL 55-85, 15 | 0    | 0 | 0 | 3614 | 294 | 45 | 27 | -5.0%  | Dom.   |
| BF | COL 50-75, 15 | 0    | 0 | 0 | 3723 | 317 | 46 | 27 | 0%     | 13.8   |
| BF | COL 50-80, 15 | 0    | 0 | 0 | 4085 | 324 | 47 | 28 | -1.9%  | 56.4*  |
| BF | COL 50-85, 15 | 0    | 0 | 0 | 4085 | 324 | 47 | 28 | -1.9%  | 56.4*  |
| BF | COL 45-75, 15 | 0    | 0 | 0 | 4485 | 342 | 48 | 29 | -0.5%  | 136.4* |
| BF | COL 45-80, 15 | 0    | 0 | 0 | 4485 | 342 | 48 | 29 | -0.5%  | 136.4* |
| BF | COL 45-85, 15 | 0    | 0 | 0 | 4485 | 342 | 48 | 29 | -0.5%  | 136.4* |
| BF | COL 55-75, 10 | 0    | 0 | 0 | 3925 | 307 | 47 | 28 | -5.4%  | Dom.   |
| BF | COL 55-80, 10 | 0    | 0 | 0 | 3925 | 307 | 47 | 28 | -5.4%  | Dom.   |
| BF | COL 55-85, 10 | 0    | 0 | 0 | 4136 | 308 | 47 | 28 | -7.2%  | Dom.   |
| BF | COL 50-75, 10 | 0    | 0 | 0 | 4405 | 342 | 50 | 29 | 0%     | 28.2   |
| BF | COL 50-80, 10 | 0    | 0 | 0 | 4721 | 345 | 50 | 30 | -1.7%  | 89.4*  |
| BF | COL 50-85, 10 | 0    | 0 | 0 | 4721 | 345 | 50 | 30 | -1.7%  | 89.4*  |
| BF | COL 45-75, 10 | 0    | 0 | 0 | 5231 | 366 | 52 | 30 | 0%     | 33.2   |
| BF | COL 45-80, 10 | 0    | 0 | 0 | 5231 | 366 | 52 | 30 | 0%     | 33.2   |
| BF | COL 45-85, 10 | 0    | 0 | 0 | 5442 | 367 | 52 | 30 | -0.5%  | 233.4* |
| BF | COL 55-75, 5  | 0    | 0 | 0 | 4982 | 323 | 50 | 29 | -10.1% | Dom.   |
| BF | COL 55-80, 5  | 0    | 0 | 0 | 5258 | 324 | 50 | 29 | -11.7% | Dom.   |
| BF | COL 55-85, 5  | 0    | 0 | 0 | 5450 | 324 | 50 | 29 | -12.3% | Dom.   |
| BF | COL 50-75, 5  | 0    | 0 | 0 | 6008 | 363 | 54 | 31 | -3.6%  | Dom.   |
| BF | COL 50-80, 5  | 0    | 0 | 0 | 6284 | 365 | 54 | 31 | -4.2%  | Dom.   |
| BF | COL 50-85, 5  | 0    | 0 | 0 | 6476 | 365 | 54 | 31 | -4.8%  | Dom.   |
| BF | COL 45-75, 5  | 0    | 0 | 0 | 7050 | 391 | 56 | 32 | 0%     | 74.1   |
| BF | COL 45-80, 5  | 0    | 0 | 0 | 7326 | 392 | 56 | 32 | 0%     | 249.5  |
| BF | COL 45-85, 5  | 0    | 0 | 0 | 7518 | 392 | 56 | 32 | 0%     | 550.7  |
| BF | FIT 55-75, 3  | 5082 | 0 | 0 | 1000 | 205 | 20 | 18 | 0%     | 4.5    |



|    |                  |       |   |   |      |     |    |    |        |       |
|----|------------------|-------|---|---|------|-----|----|----|--------|-------|
| BF | FIT 55-80, 3     | 5965  | 0 | 0 | 1091 | 219 | 21 | 20 | -0.4%  | 6.4*  |
| BF | FIT 55-85, 3     | 6569  | 0 | 0 | 1145 | 224 | 21 | 21 | -2.2%  | Dom.  |
| BF | FIT 50-75, 3     | 6577  | 0 | 0 | 1195 | 238 | 22 | 20 | 0%     | 6.0   |
| BF | FIT 50-80, 3     | 7403  | 0 | 0 | 1276 | 250 | 23 | 22 | 0%     | 6.8   |
| BF | FIT 50-85, 3     | 7714  | 0 | 0 | 1303 | 252 | 23 | 22 | -0.5%  | 10.9* |
| BF | FIT 45-75, 3     | 8114  | 0 | 0 | 1363 | 261 | 24 | 21 | -0.3%  | 7.4*  |
| BF | FIT 45-80, 3     | 8535  | 0 | 0 | 1402 | 267 | 25 | 22 | 0%     | 7.0   |
| BF | FIT 45-85, 3     | 9175  | 0 | 0 | 1458 | 273 | 25 | 23 | -0.2%  | 10.1* |
| BF | FIT 55-75, 2     | 7324  | 0 | 0 | 1276 | 240 | 25 | 21 | -3.8%  | Dom.  |
| BF | FIT 55-80, 2     | 8104  | 0 | 0 | 1343 | 248 | 26 | 23 | -4.1%  | Dom.  |
| BF | FIT 55-85, 2     | 8952  | 0 | 0 | 1406 | 253 | 26 | 24 | -5.5%  | Dom.  |
| BF | FIT 50-75, 2     | 8974  | 0 | 0 | 1480 | 272 | 28 | 23 | -1.5%  | Dom.  |
| BF | FIT 50-80, 2     | 10125 | 0 | 0 | 1574 | 284 | 29 | 24 | -0.7%  | 10.3* |
| BF | FIT 50-85, 2     | 10684 | 0 | 0 | 1615 | 287 | 29 | 25 | -1.2%  | 10.9* |
| BF | FIT 45-75, 2     | 11148 | 0 | 0 | 1691 | 297 | 30 | 24 | -0.4%  | 9.6*  |
| BF | FIT 45-80, 2     | 11909 | 0 | 0 | 1752 | 305 | 31 | 25 | 0%     | 9.3   |
| BF | FIT 45-85, 2     | 12741 | 0 | 0 | 1812 | 310 | 31 | 26 | 0%     | 13.6  |
| BF | FIT 55-75, 1     | 11915 | 0 | 0 | 1732 | 278 | 34 | 24 | -8.3%  | Dom.  |
| BF | FIT 55-80, 1     | 13448 | 0 | 0 | 1831 | 287 | 35 | 26 | -7.8%  | Dom.  |
| BF | FIT 55-85, 1     | 14552 | 0 | 0 | 1895 | 289 | 36 | 26 | -8.1%  | Dom.  |
| BF | FIT 50-75, 1     | 15021 | 0 | 0 | 2044 | 316 | 37 | 26 | -2.7%  | Dom.  |
| BF | FIT 50-80, 1     | 16529 | 0 | 0 | 2138 | 324 | 39 | 28 | -2.0%  | Dom.  |
| BF | FIT 50-85, 1     | 17621 | 0 | 0 | 2201 | 327 | 39 | 28 | -2.4%  | Dom.  |
| BF | FIT 45-75, 1     | 18305 | 0 | 0 | 2319 | 341 | 39 | 27 | -0.5%  | 16.1* |
| BF | FIT 45-80, 1     | 19800 | 0 | 0 | 2411 | 349 | 41 | 28 | 0%     | 15.2  |
| BF | FIT 45-85, 1     | 20885 | 0 | 0 | 2472 | 352 | 41 | 29 | 0%     | 22.5  |
| BF | FIT-DNA 55-75, 5 | 3435  | 0 | 0 | 1411 | 231 | 26 | 21 | -14.0% | Dom.  |
| BF | FIT-DNA 55-80, 5 | 3798  | 0 | 0 | 1484 | 238 | 26 | 22 | -14.0% | Dom.  |
| BF | FIT-DNA 55-85, 5 | 4046  | 0 | 0 | 1530 | 240 | 26 | 23 | -14.7% | Dom.  |
| BF | FIT-DNA 50-75, 5 | 4211  | 0 | 0 | 1648 | 261 | 28 | 22 | -11.1% | Dom.  |
| BF | FIT-DNA 50-80, 5 | 4569  | 0 | 0 | 1718 | 268 | 29 | 23 | -11.2% | Dom.  |
| BF | FIT-DNA 50-85, 5 | 4814  | 0 | 0 | 1762 | 270 | 29 | 24 | -11.8% | Dom.  |
| BF | FIT-DNA 45-75, 5 | 5024  | 0 | 0 | 1853 | 282 | 30 | 23 | -9.8%  | Dom.  |
| BF | FIT-DNA 45-80, 5 | 5379  | 0 | 0 | 1921 | 288 | 31 | 24 | -9.1%  | Dom.  |
| BF | FIT-DNA 45-85, 5 | 5623  | 0 | 0 | 1964 | 290 | 31 | 25 | -9.3%  | Dom.  |
| BF | FIT-DNA 55-75, 3 | 4321  | 0 | 0 | 1663 | 256 | 31 | 23 | -13.4% | Dom.  |
| BF | FIT-DNA 55-80, 3 | 4994  | 0 | 0 | 1787 | 267 | 33 | 24 | -13.2% | Dom.  |
| BF | FIT-DNA 55-85, 3 | 5447  | 0 | 0 | 1861 | 270 | 33 | 25 | -13.6% | Dom.  |
| BF | FIT-DNA 50-75, 3 | 5529  | 0 | 0 | 1989 | 294 | 34 | 25 | -8.5%  | Dom.  |
| BF | FIT-DNA 50-80, 3 | 6153  | 0 | 0 | 2099 | 303 | 36 | 26 | -7.8%  | Dom.  |
| BF | FIT-DNA 50-85, 3 | 6386  | 0 | 0 | 2136 | 304 | 36 | 26 | -8.0%  | Dom.  |
| BF | FIT-DNA 45-75, 3 | 6780  | 0 | 0 | 2278 | 319 | 37 | 26 | -6.2%  | Dom.  |
| BF | FIT-DNA 45-80, 3 | 7098  | 0 | 0 | 2333 | 324 | 37 | 27 | -5.7%  | Dom.  |
| BF | FIT-DNA 45-85, 3 | 7578  | 0 | 0 | 2409 | 328 | 38 | 27 | -6.0%  | Dom.  |
| BF | FIT-DNA 55-75, 1 | 8299  | 0 | 0 | 2522 | 300 | 42 | 27 | -14.9% | Dom.  |
| BF | FIT-DNA 55-80, 1 | 9215  | 0 | 0 | 2649 | 305 | 43 | 27 | -14.0% | Dom.  |

|    |                  |       |      |   |      |     |    |    |        |       |
|----|------------------|-------|------|---|------|-----|----|----|--------|-------|
| BF | FIT-DNA 55-85, 1 | 9886  | 0    | 0 | 2736 | 306 | 44 | 28 | -13.9% | Dom.  |
| BF | FIT-DNA 50-75, 1 | 10319 | 0    | 0 | 2980 | 338 | 46 | 28 | -6.0%  | Dom.  |
| BF | FIT-DNA 50-80, 1 | 11242 | 0    | 0 | 3105 | 343 | 47 | 29 | -5.2%  | Dom.  |
| BF | FIT-DNA 50-85, 1 | 11903 | 0    | 0 | 3190 | 344 | 47 | 29 | -5.1%  | Dom.  |
| BF | FIT-DNA 45-75, 1 | 12503 | 0    | 0 | 3403 | 363 | 48 | 29 | -0.8%  | 81.6* |
| BF | FIT-DNA 45-80, 1 | 13413 | 0    | 0 | 3526 | 368 | 49 | 30 | 0.0%   | 65.0* |
| BF | FIT-DNA 45-85, 1 | 14072 | 0    | 0 | 3610 | 369 | 49 | 30 | 0%     | 64.4  |
| BF | HSgFOBT 55-75, 3 | 4771  | 0    | 0 | 1222 | 203 | 20 | 18 | -16.2% | Dom.  |
| BF | HSgFOBT 55-80, 3 | 5566  | 0    | 0 | 1336 | 216 | 21 | 20 | -16.3% | Dom.  |
| BF | HSgFOBT 55-85, 3 | 6105  | 0    | 0 | 1405 | 220 | 21 | 21 | -17.7% | Dom.  |
| BF | HSgFOBT 50-75, 3 | 6111  | 0    | 0 | 1497 | 237 | 24 | 20 | -14.8% | Dom.  |
| BF | HSgFOBT 50-80, 3 | 6848  | 0    | 0 | 1598 | 248 | 25 | 22 | -14.2% | Dom.  |
| BF | HSgFOBT 50-85, 3 | 7123  | 0    | 0 | 1633 | 250 | 24 | 22 | -14.5% | Dom.  |
| BF | HSgFOBT 45-75, 3 | 7479  | 0    | 0 | 1745 | 261 | 26 | 21 | -14.1% | Dom.  |
| BF | HSgFOBT 45-80, 3 | 7853  | 0    | 0 | 1794 | 267 | 26 | 22 | -13.4% | Dom.  |
| BF | HSgFOBT 45-85, 3 | 8418  | 0    | 0 | 1864 | 272 | 26 | 23 | -13.1% | Dom.  |
| BF | HSgFOBT 55-75, 2 | 6672  | 0    | 0 | 1580 | 239 | 26 | 21 | -16.6% | Dom.  |
| BF | HSgFOBT 55-80, 2 | 7340  | 0    | 0 | 1665 | 247 | 27 | 23 | -16.6% | Dom.  |
| BF | HSgFOBT 55-85, 2 | 8058  | 0    | 0 | 1748 | 251 | 27 | 24 | -17.7% | Dom.  |
| BF | HSgFOBT 50-75, 2 | 8090  | 0    | 0 | 1873 | 272 | 30 | 23 | -13.1% | Dom.  |
| BF | HSgFOBT 50-80, 2 | 9067  | 0    | 0 | 1993 | 283 | 31 | 25 | -11.9% | Dom.  |
| BF | HSgFOBT 50-85, 2 | 9537  | 0    | 0 | 2046 | 286 | 31 | 25 | -12.1% | Dom.  |
| BF | HSgFOBT 45-75, 2 | 9948  | 0    | 0 | 2185 | 300 | 32 | 24 | -10.3% | Dom.  |
| BF | HSgFOBT 45-80, 2 | 10591 | 0    | 0 | 2263 | 306 | 33 | 25 | -9.7%  | Dom.  |
| BF | HSgFOBT 45-85, 2 | 11287 | 0    | 0 | 2340 | 310 | 33 | 26 | -9.9%  | Dom.  |
| BF | HSgFOBT 55-75, 1 | 9915  | 0    | 0 | 2149 | 278 | 35 | 25 | -16.2% | Dom.  |
| BF | HSgFOBT 55-80, 1 | 11058 | 0    | 0 | 2273 | 285 | 37 | 26 | -16.1% | Dom.  |
| BF | HSgFOBT 55-85, 1 | 11879 | 0    | 0 | 2354 | 287 | 37 | 26 | -16.8% | Dom.  |
| BF | HSgFOBT 50-75, 1 | 12277 | 0    | 0 | 2571 | 316 | 39 | 27 | -10.6% | Dom.  |
| BF | HSgFOBT 50-80, 1 | 13403 | 0    | 0 | 2689 | 323 | 40 | 28 | -9.1%  | Dom.  |
| BF | HSgFOBT 50-85, 1 | 14211 | 0    | 0 | 2769 | 325 | 41 | 28 | -8.9%  | Dom.  |
| BF | HSgFOBT 45-75, 1 | 14780 | 0    | 0 | 2957 | 342 | 41 | 28 | -4.8%  | Dom.  |
| BF | HSgFOBT 45-80, 1 | 15894 | 0    | 0 | 3073 | 348 | 42 | 29 | -3.6%  | Dom.  |
| BF | HSgFOBT 45-85, 1 | 16695 | 0    | 0 | 3151 | 350 | 43 | 29 | -3.3%  | Dom.  |
| BF | SIG 55-75, 10    | 0     | 1998 | 0 | 2222 | 267 | 41 | 24 | 0%     | 8.0   |
| BF | SIG 55-80, 10    | 0     | 1998 | 0 | 2222 | 267 | 41 | 24 | 0%     | 8.0   |
| BF | SIG 55-85, 10    | 0     | 2223 | 0 | 2287 | 268 | 41 | 25 | -2.6%  | Dom.  |
| BF | SIG 50-75, 10    | 0     | 2202 | 0 | 2441 | 294 | 42 | 25 | 0%     | 7.9   |
| BF | SIG 50-80, 10    | 0     | 2527 | 0 | 2549 | 299 | 43 | 26 | -0.8%  | 22.4* |
| BF | SIG 50-85, 10    | 0     | 2527 | 0 | 2549 | 299 | 43 | 26 | -0.8%  | 22.4* |
| BF | SIG 45-75, 10    | 0     | 2812 | 0 | 2743 | 314 | 45 | 26 | 0%     | 15.1  |
| BF | SIG 45-80, 10    | 0     | 2812 | 0 | 2743 | 314 | 45 | 26 | 0%     | 15.1  |
| BF | SIG 45-85, 10    | 0     | 3035 | 0 | 2806 | 315 | 45 | 27 | -0.8%  | 49.3* |
| BF | SIG 55-75, 5     | 0     | 2784 | 0 | 2483 | 285 | 44 | 26 | -4.1%  | Dom.  |
| BF | SIG 55-80, 5     | 0     | 3047 | 0 | 2547 | 287 | 44 | 26 | -4.9%  | Dom.  |
| BF | SIG 55-85, 5     | 0     | 3230 | 0 | 2588 | 287 | 44 | 26 | -5.5%  | Dom.  |

|    |               |   |      |      |      |     |    |    |       |       |
|----|---------------|---|------|------|------|-----|----|----|-------|-------|
| BF | SIG 50-75, 5  | 0 | 3429 | 0    | 2850 | 319 | 47 | 27 | -0.6% | 22.6* |
| BF | SIG 50-80, 5  | 0 | 3690 | 0    | 2913 | 321 | 47 | 28 | -1.2% | 25.6* |
| BF | SIG 50-85, 5  | 0 | 3872 | 0    | 2953 | 321 | 47 | 28 | -1.8% | 29.2* |
| BF | SIG 45-75, 5  | 0 | 4134 | 0    | 3161 | 340 | 48 | 28 | 0%    | 16.0  |
| BF | SIG 45-80, 5  | 0 | 4394 | 0    | 3224 | 342 | 49 | 29 | 0%    | 33.8  |
| BF | SIG 45-85, 5  | 0 | 4576 | 0    | 3263 | 343 | 49 | 29 | 0%    | 73.3  |
| BF | CTC 55-75, 10 | 0 | 0    | 2190 | 1473 | 235 | 31 | 21 | 0%    | 5.9   |
| BF | CTC 55-80, 10 | 0 | 0    | 2190 | 1473 | 235 | 31 | 21 | 0%    | 5.9   |
| BF | CTC 55-85, 10 | 0 | 0    | 2467 | 1547 | 239 | 32 | 22 | -4.1% | Dom.  |
| BF | CTC 50-75, 10 | 0 | 0    | 2400 | 1574 | 254 | 31 | 21 | 0%    | 5.5   |
| BF | CTC 50-80, 10 | 0 | 0    | 2800 | 1689 | 266 | 33 | 23 | -0.5% | 9.5*  |
| BF | CTC 50-85, 10 | 0 | 0    | 2800 | 1689 | 266 | 33 | 23 | -0.5% | 9.5*  |
| BF | CTC 45-75, 10 | 0 | 0    | 3090 | 1786 | 274 | 34 | 23 | -1.4% | 10.3* |
| BF | CTC 45-80, 10 | 0 | 0    | 3090 | 1786 | 274 | 34 | 23 | -1.4% | 10.3* |
| BF | CTC 45-85, 10 | 0 | 0    | 3365 | 1858 | 278 | 34 | 24 | -3.0% | Dom.  |
| BF | CTC 55-75, 5  | 0 | 0    | 3207 | 1802 | 277 | 38 | 25 | -1.2% | 9.9*  |
| BF | CTC 55-80, 5  | 0 | 0    | 3536 | 1875 | 282 | 39 | 26 | -2.2% | Dom.  |
| BF | CTC 55-85, 5  | 0 | 0    | 3762 | 1921 | 284 | 40 | 26 | -3.5% | Dom.  |
| BF | CTC 50-75, 5  | 0 | 0    | 3955 | 2062 | 310 | 41 | 26 | 0%    | 8.6   |
| BF | CTC 50-80, 5  | 0 | 0    | 4281 | 2133 | 316 | 42 | 27 | -0.6% | 13.6* |
| BF | CTC 50-85, 5  | 0 | 0    | 4505 | 2178 | 317 | 43 | 27 | -1.5% | 17.4* |
| BF | CTC 45-75, 5  | 0 | 0    | 4748 | 2284 | 333 | 42 | 27 | 0%    | 10.0  |
| BF | CTC 45-80, 5  | 0 | 0    | 5072 | 2354 | 338 | 44 | 28 | 0%    | 13.6  |
| BF | CTC 45-85, 5  | 0 | 0    | 5295 | 2399 | 339 | 44 | 28 | 0%    | 30.6  |

**SimCRC - Scenario 1: Stable CRC risk**

|    |               |   |   |   |      |     |    |    |        |        |
|----|---------------|---|---|---|------|-----|----|----|--------|--------|
| BF | No screening  | 0 | 0 | 0 | 64   | 0   | 0  | 0  | -      | -      |
| BF | COL 55-75, 15 | 0 | 0 | 0 | 2815 | 250 | 46 | 23 | 0%     | 11.0   |
| BF | COL 55-80, 15 | 0 | 0 | 0 | 2815 | 250 | 46 | 23 | 0%     | 11.0   |
| BF | COL 55-85, 15 | 0 | 0 | 0 | 3141 | 251 | 47 | 23 | -12.9% | Dom.   |
| BF | COL 50-75, 15 | 0 | 0 | 0 | 3017 | 283 | 48 | 24 | 0%     | 6.0    |
| BF | COL 50-80, 15 | 0 | 0 | 0 | 3512 | 289 | 51 | 25 | -4.7%  | Dom.   |
| BF | COL 50-85, 15 | 0 | 0 | 0 | 3512 | 289 | 51 | 25 | -4.7%  | Dom.   |
| BF | COL 45-75, 15 | 0 | 0 | 0 | 3845 | 317 | 53 | 26 | 0%     | 24.4   |
| BF | COL 45-80, 15 | 0 | 0 | 0 | 3845 | 317 | 53 | 26 | 0%     | 24.4   |
| BF | COL 45-85, 15 | 0 | 0 | 0 | 3845 | 317 | 53 | 26 | 0%     | 24.4   |
| BF | COL 55-75, 10 | 0 | 0 | 0 | 3503 | 262 | 49 | 24 | -13.7% | Dom.   |
| BF | COL 55-80, 10 | 0 | 0 | 0 | 3503 | 262 | 49 | 24 | -13.7% | Dom.   |
| BF | COL 55-85, 10 | 0 | 0 | 0 | 3789 | 262 | 50 | 24 | -16.6% | Dom.   |
| BF | COL 50-75, 10 | 0 | 0 | 0 | 3849 | 300 | 52 | 26 | -5.3%  | Dom.   |
| BF | COL 50-80, 10 | 0 | 0 | 0 | 4280 | 303 | 54 | 26 | -6.9%  | Dom.   |
| BF | COL 50-85, 10 | 0 | 0 | 0 | 4280 | 303 | 54 | 26 | -6.9%  | Dom.   |
| BF | COL 45-75, 10 | 0 | 0 | 0 | 4701 | 334 | 56 | 27 | 0%     | 50.4   |
| BF | COL 45-80, 10 | 0 | 0 | 0 | 4701 | 334 | 56 | 27 | 0%     | 50.4   |
| BF | COL 45-85, 10 | 0 | 0 | 0 | 4987 | 335 | 57 | 28 | -0.3%  | 380.6* |
| BF | COL 55-75, 5  | 0 | 0 | 0 | 4855 | 270 | 51 | 25 | -19.2% | Dom.   |
| BF | COL 55-80, 5  | 0 | 0 | 0 | 5224 | 271 | 52 | 25 | -19.5% | Dom.   |

|    |                  |       |   |   |      |     |    |    |        |        |
|----|------------------|-------|---|---|------|-----|----|----|--------|--------|
| BF | COL 55-85, 5     | 0     | 0 | 0 | 5470 | 271 | 52 | 25 | -19.8% | Dom.   |
| BF | COL 50-75, 5     | 0     | 0 | 0 | 5888 | 313 | 56 | 27 | -8.0%  | Dom.   |
| BF | COL 50-80, 5     | 0     | 0 | 0 | 6257 | 314 | 56 | 27 | -8.3%  | Dom.   |
| BF | COL 50-85, 5     | 0     | 0 | 0 | 6503 | 314 | 56 | 27 | -8.6%  | Dom.   |
| BF | COL 45-75, 5     | 0     | 0 | 0 | 6939 | 347 | 59 | 28 | 0%     | 179.2  |
| BF | COL 45-80, 5     | 0     | 0 | 0 | 7307 | 347 | 59 | 28 | 0%     | 433.8  |
| BF | COL 45-85, 5     | 0     | 0 | 0 | 7554 | 348 | 59 | 28 | 0%     | 1225.4 |
| BF | FIT 55-75, 3     | 5347  | 0 | 0 | 703  | 175 | 23 | 15 | 0%     | 3.7    |
| BF | FIT 55-80, 3     | 6340  | 0 | 0 | 793  | 187 | 25 | 17 | -5.3%  | Dom.   |
| BF | FIT 55-85, 3     | 6964  | 0 | 0 | 849  | 191 | 25 | 18 | -9.7%  | Dom.   |
| BF | FIT 50-75, 3     | 6947  | 0 | 0 | 852  | 212 | 27 | 18 | 0%     | 4.0    |
| BF | FIT 50-80, 3     | 7794  | 0 | 0 | 929  | 221 | 28 | 19 | -3.7%  | Dom.   |
| BF | FIT 50-85, 3     | 8243  | 0 | 0 | 966  | 223 | 29 | 20 | -6.1%  | Dom.   |
| BF | FIT 45-75, 3     | 8461  | 0 | 0 | 978  | 241 | 30 | 19 | 0%     | 4.4    |
| BF | FIT 45-80, 3     | 9066  | 0 | 0 | 1029 | 247 | 31 | 20 | 0.0%   | 8.2*   |
| BF | FIT 45-85, 3     | 9784  | 0 | 0 | 1091 | 251 | 31 | 21 | -1.3%  | 10.5*  |
| BF | FIT 55-75, 2     | 7713  | 0 | 0 | 927  | 206 | 29 | 18 | -10.0% | Dom.   |
| BF | FIT 55-80, 2     | 8598  | 0 | 0 | 999  | 213 | 30 | 20 | -12.5% | Dom.   |
| BF | FIT 55-85, 2     | 9570  | 0 | 0 | 1074 | 217 | 31 | 20 | -14.2% | Dom.   |
| BF | FIT 50-75, 2     | 9438  | 0 | 0 | 1075 | 241 | 33 | 20 | -4.7%  | Dom.   |
| BF | FIT 50-80, 2     | 10754 | 0 | 0 | 1179 | 251 | 35 | 22 | -5.7%  | Dom.   |
| BF | FIT 50-85, 2     | 11398 | 0 | 0 | 1229 | 253 | 35 | 22 | -6.9%  | Dom.   |
| BF | FIT 45-75, 2     | 11722 | 0 | 0 | 1249 | 274 | 36 | 22 | 0%     | 8.1    |
| BF | FIT 45-80, 2     | 12597 | 0 | 0 | 1318 | 280 | 37 | 23 | 0%     | 11.1   |
| BF | FIT 45-85, 2     | 13561 | 0 | 0 | 1392 | 284 | 38 | 24 | -0.3%  | 19.7*  |
| BF | FIT 55-75, 1     | 12744 | 0 | 0 | 1324 | 237 | 37 | 21 | -15.5% | Dom.   |
| BF | FIT 55-80, 1     | 14522 | 0 | 0 | 1442 | 243 | 39 | 22 | -15.6% | Dom.   |
| BF | FIT 55-85, 1     | 15812 | 0 | 0 | 1524 | 246 | 40 | 23 | -16.3% | Dom.   |
| BF | FIT 50-75, 1     | 16076 | 0 | 0 | 1569 | 278 | 42 | 23 | -6.2%  | Dom.   |
| BF | FIT 50-80, 1     | 17843 | 0 | 0 | 1685 | 284 | 44 | 24 | -6.6%  | Dom.   |
| BF | FIT 50-85, 1     | 19127 | 0 | 0 | 1766 | 286 | 44 | 25 | -7.4%  | Dom.   |
| BF | FIT 45-75, 1     | 19536 | 0 | 0 | 1797 | 311 | 45 | 25 | 0%     | 15.7   |
| BF | FIT 45-80, 1     | 21297 | 0 | 0 | 1912 | 317 | 47 | 26 | 0%     | 20.2   |
| BF | FIT 45-85, 1     | 22578 | 0 | 0 | 1992 | 319 | 47 | 26 | 0%     | 40.3   |
| BF | FIT-DNA 55-75, 5 | 3613  | 0 | 0 | 1047 | 193 | 29 | 18 | -22.6% | Dom.   |
| BF | FIT-DNA 55-80, 5 | 4031  | 0 | 0 | 1128 | 198 | 30 | 19 | -23.6% | Dom.   |
| BF | FIT-DNA 55-85, 5 | 4321  | 0 | 0 | 1183 | 200 | 30 | 19 | -24.9% | Dom.   |
| BF | FIT-DNA 50-75, 5 | 4438  | 0 | 0 | 1227 | 228 | 33 | 19 | -16.2% | Dom.   |
| BF | FIT-DNA 50-80, 5 | 4853  | 0 | 0 | 1307 | 233 | 34 | 20 | -16.7% | Dom.   |
| BF | FIT-DNA 50-85, 5 | 5141  | 0 | 0 | 1361 | 234 | 34 | 21 | -17.2% | Dom.   |
| BF | FIT-DNA 45-75, 5 | 5288  | 0 | 0 | 1392 | 255 | 36 | 21 | -10.5% | Dom.   |
| BF | FIT-DNA 45-80, 5 | 5702  | 0 | 0 | 1471 | 260 | 37 | 22 | -10.4% | Dom.   |
| BF | FIT-DNA 45-85, 5 | 5989  | 0 | 0 | 1525 | 262 | 37 | 22 | -10.8% | Dom.   |
| BF | FIT-DNA 55-75, 3 | 4730  | 0 | 0 | 1274 | 220 | 34 | 20 | -20.5% | Dom.   |
| BF | FIT-DNA 55-80, 3 | 5518  | 0 | 0 | 1416 | 228 | 36 | 21 | -20.5% | Dom.   |
| BF | FIT-DNA 55-85, 3 | 5947  | 0 | 0 | 1490 | 230 | 37 | 22 | -21.0% | Dom.   |

|    |                  |       |      |   |      |     |    |    |        |       |
|----|------------------|-------|------|---|------|-----|----|----|--------|-------|
| BF | FIT-DNA 50-75, 3 | 6077  | 0    | 0 | 1544 | 261 | 39 | 22 | -11.4% | Dom.  |
| BF | FIT-DNA 50-80, 3 | 6665  | 0    | 0 | 1649 | 267 | 41 | 23 | -11.4% | Dom.  |
| BF | FIT-DNA 50-85, 3 | 7124  | 0    | 0 | 1725 | 269 | 41 | 24 | -12.1% | Dom.  |
| BF | FIT-DNA 45-75, 3 | 7257  | 0    | 0 | 1759 | 292 | 42 | 23 | -5.5%  | Dom.  |
| BF | FIT-DNA 45-80, 3 | 7883  | 0    | 0 | 1866 | 297 | 44 | 24 | -5.4%  | Dom.  |
| BF | FIT-DNA 45-85, 3 | 8399  | 0    | 0 | 1954 | 300 | 44 | 25 | -5.5%  | Dom.  |
| BF | FIT-DNA 55-75, 1 | 9062  | 0    | 0 | 2042 | 253 | 44 | 23 | -20.8% | Dom.  |
| BF | FIT-DNA 55-80, 1 | 10183 | 0    | 0 | 2206 | 257 | 45 | 24 | -20.1% | Dom.  |
| BF | FIT-DNA 55-85, 1 | 11008 | 0    | 0 | 2322 | 258 | 46 | 24 | -20.1% | Dom.  |
| BF | FIT-DNA 50-75, 1 | 11299 | 0    | 0 | 2422 | 294 | 48 | 25 | -9.3%  | Dom.  |
| BF | FIT-DNA 50-80, 1 | 12442 | 0    | 0 | 2588 | 298 | 50 | 26 | -8.7%  | Dom.  |
| BF | FIT-DNA 50-85, 1 | 13259 | 0    | 0 | 2703 | 299 | 50 | 26 | -8.7%  | Dom.  |
| BF | FIT-DNA 45-75, 1 | 13664 | 0    | 0 | 2789 | 327 | 52 | 26 | -0.5%  | 99.5* |
| BF | FIT-DNA 45-80, 1 | 14795 | 0    | 0 | 2953 | 330 | 53 | 27 | 0%     | 82.9  |
| BF | FIT-DNA 45-85, 1 | 15610 | 0    | 0 | 3067 | 331 | 53 | 27 | 0%     | 94.9  |
| BF | HSgFOBT 55-75, 3 | 5049  | 0    | 0 | 949  | 176 | 24 | 16 | -24.8% | Dom.  |
| BF | HSgFOBT 55-80, 3 | 5945  | 0    | 0 | 1068 | 187 | 26 | 17 | -25.9% | Dom.  |
| BF | HSgFOBT 55-85, 3 | 6462  | 0    | 0 | 1134 | 190 | 27 | 18 | -27.0% | Dom.  |
| BF | HSgFOBT 50-75, 3 | 6511  | 0    | 0 | 1167 | 214 | 29 | 18 | -18.8% | Dom.  |
| BF | HSgFOBT 50-80, 3 | 7211  | 0    | 0 | 1260 | 222 | 30 | 19 | -19.3% | Dom.  |
| BF | HSgFOBT 50-85, 3 | 7687  | 0    | 0 | 1318 | 225 | 31 | 20 | -19.9% | Dom.  |
| BF | HSgFOBT 45-75, 3 | 7815  | 0    | 0 | 1349 | 243 | 32 | 19 | -13.9% | Dom.  |
| BF | HSgFOBT 45-80, 3 | 8458  | 0    | 0 | 1428 | 249 | 33 | 20 | -13.3% | Dom.  |
| BF | HSgFOBT 45-85, 3 | 9073  | 0    | 0 | 1506 | 253 | 33 | 21 | -13.4% | Dom.  |
| BF | HSgFOBT 55-75, 2 | 6975  | 0    | 0 | 1240 | 207 | 31 | 19 | -24.3% | Dom.  |
| BF | HSgFOBT 55-80, 2 | 7741  | 0    | 0 | 1335 | 213 | 32 | 20 | -24.4% | Dom.  |
| BF | HSgFOBT 55-85, 2 | 8578  | 0    | 0 | 1433 | 216 | 32 | 21 | -24.8% | Dom.  |
| BF | HSgFOBT 50-75, 2 | 8481  | 0    | 0 | 1459 | 243 | 35 | 20 | -16.0% | Dom.  |
| BF | HSgFOBT 50-80, 2 | 9617  | 0    | 0 | 1597 | 252 | 37 | 22 | -15.6% | Dom.  |
| BF | HSgFOBT 50-85, 2 | 10171 | 0    | 0 | 1661 | 254 | 37 | 22 | -16.1% | Dom.  |
| BF | HSgFOBT 45-75, 2 | 10472 | 0    | 0 | 1717 | 277 | 38 | 22 | -9.5%  | Dom.  |
| BF | HSgFOBT 45-80, 2 | 11226 | 0    | 0 | 1808 | 282 | 40 | 23 | -9.4%  | Dom.  |
| BF | HSgFOBT 45-85, 2 | 12052 | 0    | 0 | 1904 | 285 | 40 | 24 | -9.7%  | Dom.  |
| BF | HSgFOBT 55-75, 1 | 10533 | 0    | 0 | 1728 | 238 | 39 | 22 | -22.5% | Dom.  |
| BF | HSgFOBT 55-80, 1 | 11905 | 0    | 0 | 1879 | 243 | 40 | 23 | -22.9% | Dom.  |
| BF | HSgFOBT 55-85, 1 | 12901 | 0    | 0 | 1985 | 245 | 41 | 23 | -23.1% | Dom.  |
| BF | HSgFOBT 50-75, 1 | 13136 | 0    | 0 | 2068 | 279 | 44 | 24 | -12.7% | Dom.  |
| BF | HSgFOBT 50-80, 1 | 14507 | 0    | 0 | 2217 | 284 | 45 | 25 | -11.6% | Dom.  |
| BF | HSgFOBT 50-85, 1 | 15498 | 0    | 0 | 2321 | 286 | 45 | 25 | -11.4% | Dom.  |
| BF | HSgFOBT 45-75, 1 | 15850 | 0    | 0 | 2391 | 312 | 47 | 25 | -3.6%  | Dom.  |
| BF | HSgFOBT 45-80, 1 | 17214 | 0    | 0 | 2539 | 317 | 48 | 26 | -2.6%  | Dom.  |
| BF | HSgFOBT 45-85, 1 | 18201 | 0    | 0 | 2642 | 318 | 49 | 26 | -2.4%  | Dom.  |
| BF | SIG 55-75, 10    | 0     | 2303 | 0 | 1122 | 177 | 33 | 17 | 0%     | 6.0   |
| BF | SIG 55-80, 10    | 0     | 2303 | 0 | 1122 | 177 | 33 | 17 | 0%     | 6.0   |
| BF | SIG 55-85, 10    | 0     | 2623 | 0 | 1210 | 178 | 33 | 17 | -12.7% | Dom.  |
| BF | SIG 50-75, 10    | 0     | 2500 | 0 | 1193 | 202 | 35 | 17 | 0%     | 2.8   |

|    |               |   |      |      |      |     |    |    |        |       |
|----|---------------|---|------|------|------|-----|----|----|--------|-------|
| BF | SIG 50-80, 10 | 0 | 2957 | 0    | 1326 | 207 | 37 | 18 | -5.3%  | Dom.  |
| BF | SIG 50-85, 10 | 0 | 2957 | 0    | 1326 | 207 | 37 | 18 | -5.3%  | Dom.  |
| BF | SIG 45-75, 10 | 0 | 3231 | 0    | 1412 | 230 | 38 | 19 | 0%     | 7.9   |
| BF | SIG 45-80, 10 | 0 | 3231 | 0    | 1412 | 230 | 38 | 19 | 0%     | 7.9   |
| BF | SIG 45-85, 10 | 0 | 3548 | 0    | 1499 | 231 | 39 | 20 | -1.9%  | 53.4* |
| BF | SIG 55-75, 5  | 0 | 3401 | 0    | 1417 | 198 | 37 | 19 | -14.1% | Dom.  |
| BF | SIG 55-80, 5  | 0 | 3778 | 0    | 1507 | 200 | 38 | 19 | -15.4% | Dom.  |
| BF | SIG 55-85, 5  | 0 | 4038 | 0    | 1566 | 201 | 39 | 19 | -16.5% | Dom.  |
| BF | SIG 50-75, 5  | 0 | 4182 | 0    | 1643 | 232 | 41 | 20 | -5.5%  | Dom.  |
| BF | SIG 50-80, 5  | 0 | 4557 | 0    | 1732 | 235 | 42 | 21 | -6.9%  | Dom.  |
| BF | SIG 50-85, 5  | 0 | 4815 | 0    | 1790 | 236 | 42 | 21 | -8.1%  | Dom.  |
| BF | SIG 45-75, 5  | 0 | 4992 | 0    | 1852 | 261 | 44 | 22 | 0%     | 14.2  |
| BF | SIG 45-80, 5  | 0 | 5365 | 0    | 1940 | 263 | 45 | 22 | 0%     | 37.9  |
| BF | SIG 45-85, 5  | 0 | 5623 | 0    | 1998 | 264 | 45 | 22 | 0%     | 86.5  |
| BF | CTC 55-75, 10 | 0 | 0    | 2283 | 1220 | 225 | 40 | 21 | 0%     | 5.1   |
| BF | CTC 55-80, 10 | 0 | 0    | 2283 | 1220 | 225 | 40 | 21 | 0%     | 5.1   |
| BF | CTC 55-85, 10 | 0 | 0    | 2592 | 1319 | 227 | 41 | 21 | -12.9% | Dom.  |
| BF | CTC 50-75, 10 | 0 | 0    | 2485 | 1278 | 255 | 42 | 22 | 0%     | 2.0   |
| BF | CTC 50-80, 10 | 0 | 0    | 2930 | 1424 | 262 | 45 | 23 | -5.5%  | Dom.  |
| BF | CTC 50-85, 10 | 0 | 0    | 2930 | 1424 | 262 | 45 | 23 | -5.5%  | Dom.  |
| BF | CTC 45-75, 10 | 0 | 0    | 3211 | 1499 | 288 | 46 | 24 | 0%     | 6.7   |
| BF | CTC 45-80, 10 | 0 | 0    | 3211 | 1499 | 288 | 46 | 24 | 0%     | 6.7   |
| BF | CTC 45-85, 10 | 0 | 0    | 3518 | 1597 | 290 | 47 | 24 | -1.6%  | 48.0* |
| BF | CTC 55-75, 5  | 0 | 0    | 3370 | 1504 | 246 | 45 | 23 | -14.8% | Dom.  |
| BF | CTC 55-80, 5  | 0 | 0    | 3738 | 1597 | 248 | 46 | 23 | -15.7% | Dom.  |
| BF | CTC 55-85, 5  | 0 | 0    | 3989 | 1658 | 249 | 46 | 23 | -16.7% | Dom.  |
| BF | CTC 50-75, 5  | 0 | 0    | 4159 | 1721 | 286 | 49 | 25 | -5.7%  | Dom.  |
| BF | CTC 50-80, 5  | 0 | 0    | 4525 | 1813 | 289 | 50 | 25 | -6.8%  | Dom.  |
| BF | CTC 50-85, 5  | 0 | 0    | 4776 | 1874 | 290 | 50 | 25 | -7.8%  | Dom.  |
| BF | CTC 45-75, 5  | 0 | 0    | 4980 | 1916 | 317 | 52 | 26 | 0%     | 14.3  |
| BF | CTC 45-80, 5  | 0 | 0    | 5345 | 2007 | 320 | 53 | 26 | 0%     | 35.4  |
| BF | CTC 45-85, 5  | 0 | 0    | 5596 | 2068 | 320 | 53 | 27 | 0%     | 83.4  |

#### SimCRC - Scenario 2: Increased CRC risk

|    |               |   |   |   |      |     |    |    |        |      |
|----|---------------|---|---|---|------|-----|----|----|--------|------|
| BF | No screening  | 0 | 0 | 0 | 80   | 0   | 0  | 0  | -      | -    |
| BF | COL 55-75, 15 | 0 | 0 | 0 | 2733 | 306 | 54 | 28 | 0%     | 8.7  |
| BF | COL 55-80, 15 | 0 | 0 | 0 | 2733 | 306 | 54 | 28 | 0%     | 8.7  |
| BF | COL 55-85, 15 | 0 | 0 | 0 | 3067 | 308 | 55 | 28 | -12.9% | Dom. |
| BF | COL 50-75, 15 | 0 | 0 | 0 | 2923 | 346 | 56 | 28 | 0%     | 4.7  |
| BF | COL 50-80, 15 | 0 | 0 | 0 | 3429 | 356 | 60 | 30 | -4.7%  | Dom. |
| BF | COL 50-85, 15 | 0 | 0 | 0 | 3429 | 356 | 60 | 30 | -4.7%  | Dom. |
| BF | COL 45-75, 15 | 0 | 0 | 0 | 3755 | 391 | 63 | 32 | 0%     | 18.7 |
| BF | COL 45-80, 15 | 0 | 0 | 0 | 3755 | 391 | 63 | 32 | 0%     | 18.7 |
| BF | COL 45-85, 15 | 0 | 0 | 0 | 3755 | 391 | 63 | 32 | 0%     | 18.7 |
| BF | COL 55-75, 10 | 0 | 0 | 0 | 3434 | 325 | 59 | 30 | -13.2% | Dom. |
| BF | COL 55-80, 10 | 0 | 0 | 0 | 3434 | 325 | 59 | 30 | -13.2% | Dom. |
| BF | COL 55-85, 10 | 0 | 0 | 0 | 3727 | 326 | 60 | 30 | -16.3% | Dom. |

|    |                  |       |   |   |      |     |    |    |        |        |
|----|------------------|-------|---|---|------|-----|----|----|--------|--------|
| BF | COL 50-75, 10    | 0     | 0 | 0 | 3768 | 372 | 62 | 31 | -4.9%  | Dom.   |
| BF | COL 50-80, 10    | 0     | 0 | 0 | 4212 | 377 | 65 | 32 | -6.7%  | Dom.   |
| BF | COL 50-85, 10    | 0     | 0 | 0 | 4212 | 377 | 65 | 32 | -6.7%  | Dom.   |
| BF | COL 45-75, 10    | 0     | 0 | 0 | 4623 | 416 | 67 | 33 | 0%     | 34.8   |
| BF | COL 45-80, 10    | 0     | 0 | 0 | 4623 | 416 | 67 | 33 | 0%     | 34.8   |
| BF | COL 45-85, 10    | 0     | 0 | 0 | 4917 | 417 | 68 | 34 | -0.3%  | 223.5* |
| BF | COL 55-75, 5     | 0     | 0 | 0 | 4821 | 338 | 62 | 31 | -19.1% | Dom.   |
| BF | COL 55-80, 5     | 0     | 0 | 0 | 5202 | 339 | 63 | 31 | -19.4% | Dom.   |
| BF | COL 55-85, 5     | 0     | 0 | 0 | 5456 | 340 | 63 | 31 | -19.7% | Dom.   |
| BF | COL 50-75, 5     | 0     | 0 | 0 | 5859 | 392 | 68 | 33 | -8.0%  | Dom.   |
| BF | COL 50-80, 5     | 0     | 0 | 0 | 6239 | 394 | 69 | 34 | -8.3%  | Dom.   |
| BF | COL 50-85, 5     | 0     | 0 | 0 | 6493 | 394 | 69 | 34 | -8.6%  | Dom.   |
| BF | COL 45-75, 5     | 0     | 0 | 0 | 6913 | 435 | 71 | 35 | 0%     | 121.6  |
| BF | COL 45-80, 5     | 0     | 0 | 0 | 7293 | 436 | 72 | 35 | 0%     | 241.7  |
| BF | COL 45-85, 5     | 0     | 0 | 0 | 7547 | 437 | 73 | 35 | 0%     | 687.9  |
| BF | FIT 55-75, 3     | 5338  | 0 | 0 | 684  | 211 | 26 | 18 | 0%     | 2.9    |
| BF | FIT 55-80, 3     | 6332  | 0 | 0 | 771  | 227 | 28 | 20 | -5.4%  | Dom.   |
| BF | FIT 55-85, 3     | 6954  | 0 | 0 | 825  | 231 | 28 | 21 | -9.9%  | Dom.   |
| BF | FIT 50-75, 3     | 6946  | 0 | 0 | 827  | 258 | 31 | 21 | 0%     | 3.1    |
| BF | FIT 50-80, 3     | 7791  | 0 | 0 | 901  | 270 | 32 | 23 | -3.6%  | Dom.   |
| BF | FIT 50-85, 3     | 8242  | 0 | 0 | 939  | 273 | 33 | 23 | -6.1%  | Dom.   |
| BF | FIT 45-75, 3     | 8465  | 0 | 0 | 949  | 294 | 34 | 23 | 0%     | 3.4    |
| BF | FIT 45-80, 3     | 9073  | 0 | 0 | 998  | 302 | 35 | 24 | 0%     | 6.0    |
| BF | FIT 45-85, 3     | 9792  | 0 | 0 | 1059 | 308 | 36 | 25 | -1.3%  | 10.2*  |
| BF | FIT 55-75, 2     | 7711  | 0 | 0 | 896  | 251 | 33 | 22 | -9.9%  | Dom.   |
| BF | FIT 55-80, 2     | 8599  | 0 | 0 | 967  | 260 | 35 | 23 | -12.4% | Dom.   |
| BF | FIT 55-85, 2     | 9576  | 0 | 0 | 1041 | 265 | 35 | 25 | -14.1% | Dom.   |
| BF | FIT 50-75, 2     | 9448  | 0 | 0 | 1038 | 294 | 38 | 24 | -4.6%  | Dom.   |
| BF | FIT 50-80, 2     | 10772 | 0 | 0 | 1140 | 307 | 40 | 26 | -5.5%  | Dom.   |
| BF | FIT 50-85, 2     | 11420 | 0 | 0 | 1189 | 311 | 40 | 27 | -6.7%  | Dom.   |
| BF | FIT 45-75, 2     | 11747 | 0 | 0 | 1207 | 336 | 42 | 26 | 0%     | 6.1    |
| BF | FIT 45-80, 2     | 12627 | 0 | 0 | 1276 | 345 | 43 | 27 | 0%     | 7.9    |
| BF | FIT 45-85, 2     | 13597 | 0 | 0 | 1348 | 350 | 44 | 29 | -0.3%  | 14.2*  |
| BF | FIT 55-75, 1     | 12784 | 0 | 0 | 1275 | 291 | 43 | 26 | -15.5% | Dom.   |
| BF | FIT 55-80, 1     | 14585 | 0 | 0 | 1393 | 300 | 46 | 27 | -15.4% | Dom.   |
| BF | FIT 55-85, 1     | 15893 | 0 | 0 | 1474 | 303 | 46 | 28 | -16.2% | Dom.   |
| BF | FIT 50-75, 1     | 16149 | 0 | 0 | 1513 | 343 | 49 | 28 | -6.1%  | Dom.   |
| BF | FIT 50-80, 1     | 17941 | 0 | 0 | 1629 | 352 | 51 | 30 | -6.3%  | Dom.   |
| BF | FIT 50-85, 1     | 19244 | 0 | 0 | 1710 | 355 | 52 | 30 | -7.2%  | Dom.   |
| BF | FIT 45-75, 1     | 19641 | 0 | 0 | 1735 | 384 | 53 | 30 | 0%     | 11.6   |
| BF | FIT 45-80, 1     | 21428 | 0 | 0 | 1850 | 393 | 55 | 31 | 0%     | 13.4   |
| BF | FIT 45-85, 1     | 22729 | 0 | 0 | 1930 | 396 | 56 | 32 | 0%     | 26.3   |
| BF | FIT-DNA 55-75, 5 | 3614  | 0 | 0 | 1012 | 235 | 33 | 21 | -22.9% | Dom.   |
| BF | FIT-DNA 55-80, 5 | 4034  | 0 | 0 | 1092 | 242 | 34 | 22 | -23.9% | Dom.   |
| BF | FIT-DNA 55-85, 5 | 4325  | 0 | 0 | 1146 | 244 | 35 | 23 | -25.2% | Dom.   |
| BF | FIT-DNA 50-75, 5 | 4445  | 0 | 0 | 1185 | 277 | 38 | 23 | -16.6% | Dom.   |

|    |                  |       |   |   |      |     |    |    |        |       |
|----|------------------|-------|---|---|------|-----|----|----|--------|-------|
| BF | FIT-DNA 50-80, 5 | 4863  | 0 | 0 | 1264 | 284 | 39 | 24 | -17.2% | Dom.  |
| BF | FIT-DNA 50-85, 5 | 5153  | 0 | 0 | 1317 | 286 | 39 | 25 | -17.8% | Dom.  |
| BF | FIT-DNA 45-75, 5 | 5301  | 0 | 0 | 1347 | 312 | 41 | 25 | -11.1% | Dom.  |
| BF | FIT-DNA 45-80, 5 | 5717  | 0 | 0 | 1424 | 319 | 42 | 26 | -10.9% | Dom.  |
| BF | FIT-DNA 45-85, 5 | 6006  | 0 | 0 | 1478 | 321 | 42 | 26 | -11.4% | Dom.  |
| BF | FIT-DNA 55-75, 3 | 4739  | 0 | 0 | 1229 | 268 | 39 | 24 | -21.0% | Dom.  |
| BF | FIT-DNA 55-80, 3 | 5535  | 0 | 0 | 1370 | 279 | 42 | 25 | -20.8% | Dom.  |
| BF | FIT-DNA 55-85, 3 | 5968  | 0 | 0 | 1444 | 282 | 43 | 26 | -21.4% | Dom.  |
| BF | FIT-DNA 50-75, 3 | 6098  | 0 | 0 | 1492 | 320 | 45 | 26 | -11.9% | Dom.  |
| BF | FIT-DNA 50-80, 3 | 6693  | 0 | 0 | 1596 | 328 | 47 | 28 | -11.8% | Dom.  |
| BF | FIT-DNA 50-85, 3 | 7158  | 0 | 0 | 1672 | 332 | 48 | 28 | -12.5% | Dom.  |
| BF | FIT-DNA 45-75, 3 | 7288  | 0 | 0 | 1700 | 359 | 49 | 28 | -5.9%  | Dom.  |
| BF | FIT-DNA 45-80, 3 | 7923  | 0 | 0 | 1807 | 367 | 51 | 29 | -5.7%  | Dom.  |
| BF | FIT-DNA 45-85, 3 | 8446  | 0 | 0 | 1896 | 371 | 52 | 30 | -6.0%  | Dom.  |
| BF | FIT-DNA 55-75, 1 | 9131  | 0 | 0 | 1976 | 312 | 52 | 28 | -21.4% | Dom.  |
| BF | FIT-DNA 55-80, 1 | 10277 | 0 | 0 | 2142 | 318 | 54 | 29 | -20.4% | Dom.  |
| BF | FIT-DNA 55-85, 1 | 11120 | 0 | 0 | 2260 | 320 | 55 | 29 | -20.3% | Dom.  |
| BF | FIT-DNA 50-75, 1 | 11400 | 0 | 0 | 2348 | 364 | 57 | 30 | -9.6%  | Dom.  |
| BF | FIT-DNA 50-80, 1 | 12569 | 0 | 0 | 2517 | 370 | 59 | 31 | -8.7%  | Dom.  |
| BF | FIT-DNA 50-85, 1 | 13404 | 0 | 0 | 2634 | 372 | 60 | 32 | -8.7%  | Dom.  |
| BF | FIT-DNA 45-75, 1 | 13792 | 0 | 0 | 2709 | 406 | 61 | 32 | -0.8%  | 79.9* |
| BF | FIT-DNA 45-80, 1 | 14948 | 0 | 0 | 2876 | 412 | 63 | 33 | 0.0%   | 60.9* |
| BF | FIT-DNA 45-85, 1 | 15782 | 0 | 0 | 2993 | 414 | 64 | 33 | 0%     | 60.6  |
| BF | HSgFOBT 55-75, 3 | 5041  | 0 | 0 | 924  | 213 | 28 | 19 | -25.7% | Dom.  |
| BF | HSgFOBT 55-80, 3 | 5939  | 0 | 0 | 1041 | 227 | 30 | 21 | -26.5% | Dom.  |
| BF | HSgFOBT 55-85, 3 | 6455  | 0 | 0 | 1106 | 231 | 30 | 22 | -27.7% | Dom.  |
| BF | HSgFOBT 50-75, 3 | 6512  | 0 | 0 | 1135 | 261 | 33 | 21 | -19.7% | Dom.  |
| BF | HSgFOBT 50-80, 3 | 7213  | 0 | 0 | 1226 | 271 | 35 | 23 | -20.0% | Dom.  |
| BF | HSgFOBT 50-85, 3 | 7692  | 0 | 0 | 1284 | 274 | 35 | 24 | -20.6% | Dom.  |
| BF | HSgFOBT 45-75, 3 | 7822  | 0 | 0 | 1311 | 297 | 37 | 23 | -14.5% | Dom.  |
| BF | HSgFOBT 45-80, 3 | 8471  | 0 | 0 | 1390 | 306 | 38 | 24 | -13.8% | Dom.  |
| BF | HSgFOBT 45-85, 3 | 9088  | 0 | 0 | 1466 | 311 | 39 | 26 | -14.0% | Dom.  |
| BF | HSgFOBT 55-75, 2 | 6972  | 0 | 0 | 1204 | 252 | 35 | 22 | -24.9% | Dom.  |
| BF | HSgFOBT 55-80, 2 | 7743  | 0 | 0 | 1298 | 261 | 37 | 24 | -24.8% | Dom.  |
| BF | HSgFOBT 55-85, 2 | 8585  | 0 | 0 | 1396 | 265 | 38 | 25 | -25.3% | Dom.  |
| BF | HSgFOBT 50-75, 2 | 8493  | 0 | 0 | 1415 | 297 | 40 | 24 | -16.7% | Dom.  |
| BF | HSgFOBT 50-80, 2 | 9639  | 0 | 0 | 1551 | 309 | 42 | 26 | -16.2% | Dom.  |
| BF | HSgFOBT 50-85, 2 | 10198 | 0 | 0 | 1616 | 312 | 43 | 27 | -16.6% | Dom.  |
| BF | HSgFOBT 45-75, 2 | 10500 | 0 | 0 | 1666 | 340 | 44 | 27 | -10.2% | Dom.  |
| BF | HSgFOBT 45-80, 2 | 11261 | 0 | 0 | 1757 | 348 | 46 | 28 | -10.0% | Dom.  |
| BF | HSgFOBT 45-85, 2 | 12096 | 0 | 0 | 1853 | 352 | 47 | 29 | -10.4% | Dom.  |
| BF | HSgFOBT 55-75, 1 | 10562 | 0 | 0 | 1675 | 292 | 45 | 26 | -22.9% | Dom.  |
| BF | HSgFOBT 55-80, 1 | 11954 | 0 | 0 | 1826 | 300 | 47 | 27 | -23.3% | Dom.  |
| BF | HSgFOBT 55-85, 1 | 12967 | 0 | 0 | 1933 | 303 | 48 | 28 | -23.6% | Dom.  |
| BF | HSgFOBT 50-75, 1 | 13198 | 0 | 0 | 2005 | 344 | 51 | 29 | -13.4% | Dom.  |
| BF | HSgFOBT 50-80, 1 | 14592 | 0 | 0 | 2156 | 352 | 53 | 30 | -12.0% | Dom.  |



|    |                  |       |      |      |      |     |    |    |        |       |
|----|------------------|-------|------|------|------|-----|----|----|--------|-------|
| BF | HSgFOBT 50-85, 1 | 15600 | 0    | 0    | 2261 | 354 | 54 | 30 | -11.7% | Dom.  |
| BF | HSgFOBT 45-75, 1 | 15942 | 0    | 0    | 2322 | 386 | 55 | 30 | -4.2%  | Dom.  |
| BF | HSgFOBT 45-80, 1 | 17331 | 0    | 0    | 2471 | 393 | 57 | 32 | -2.9%  | Dom.  |
| BF | HSgFOBT 45-85, 1 | 18336 | 0    | 0    | 2576 | 396 | 58 | 32 | -2.7%  | Dom.  |
| BF | SIG 55-75, 10    | 0     | 2256 | 0    | 1336 | 272 | 48 | 25 | 0%     | 4.6   |
| BF | SIG 55-80, 10    | 0     | 2256 | 0    | 1336 | 272 | 48 | 25 | 0%     | 4.6   |
| BF | SIG 55-85, 10    | 0     | 2554 | 0    | 1434 | 274 | 49 | 26 | -12.4% | Dom.  |
| BF | SIG 50-75, 10    | 0     | 2460 | 0    | 1415 | 310 | 51 | 26 | 0%     | 2.1   |
| BF | SIG 50-80, 10    | 0     | 2891 | 0    | 1564 | 317 | 53 | 27 | -5.4%  | Dom.  |
| BF | SIG 50-85, 10    | 0     | 2891 | 0    | 1564 | 317 | 53 | 27 | -5.4%  | Dom.  |
| BF | SIG 45-75, 10    | 0     | 3174 | 0    | 1657 | 351 | 56 | 29 | 0%     | 5.9   |
| BF | SIG 45-80, 10    | 0     | 3174 | 0    | 1657 | 351 | 56 | 29 | 0%     | 5.9   |
| BF | SIG 45-85, 10    | 0     | 3471 | 0    | 1754 | 353 | 57 | 29 | -1.3%  | 45.8* |
| BF | SIG 55-75, 5     | 0     | 3288 | 0    | 1611 | 292 | 52 | 27 | -15.0% | Dom.  |
| BF | SIG 55-80, 5     | 0     | 3640 | 0    | 1706 | 295 | 54 | 27 | -16.8% | Dom.  |
| BF | SIG 55-85, 5     | 0     | 3881 | 0    | 1768 | 296 | 54 | 28 | -17.6% | Dom.  |
| BF | SIG 50-75, 5     | 0     | 4059 | 0    | 1851 | 340 | 58 | 29 | -6.6%  | Dom.  |
| BF | SIG 50-80, 5     | 0     | 4410 | 0    | 1945 | 343 | 59 | 30 | -7.4%  | Dom.  |
| BF | SIG 50-85, 5     | 0     | 4650 | 0    | 2006 | 344 | 59 | 30 | -8.2%  | Dom.  |
| BF | SIG 45-75, 5     | 0     | 4862 | 0    | 2068 | 379 | 61 | 31 | 0%     | 14.6  |
| BF | SIG 45-80, 5     | 0     | 5212 | 0    | 2162 | 382 | 62 | 31 | 0%     | 32.1  |
| BF | SIG 45-85, 5     | 0     | 5452 | 0    | 2223 | 383 | 63 | 31 | 0%     | 78.9  |
| BF | CTC 55-75, 10    | 0     | 0    | 2293 | 1153 | 275 | 47 | 25 | 0%     | 3.9   |
| BF | CTC 55-80, 10    | 0     | 0    | 2293 | 1153 | 275 | 47 | 25 | 0%     | 3.9   |
| BF | CTC 55-85, 10    | 0     | 0    | 2606 | 1251 | 278 | 48 | 26 | -12.9% | Dom.  |
| BF | CTC 50-75, 10    | 0     | 0    | 2495 | 1209 | 311 | 49 | 26 | 0%     | 1.6   |
| BF | CTC 50-80, 10    | 0     | 0    | 2947 | 1353 | 320 | 52 | 28 | -5.6%  | Dom.  |
| BF | CTC 50-85, 10    | 0     | 0    | 2947 | 1353 | 320 | 52 | 28 | -5.6%  | Dom.  |
| BF | CTC 45-75, 10    | 0     | 0    | 3228 | 1425 | 354 | 54 | 28 | 0%     | 5.0   |
| BF | CTC 45-80, 10    | 0     | 0    | 3228 | 1425 | 354 | 54 | 28 | 0%     | 5.0   |
| BF | CTC 45-85, 10    | 0     | 0    | 3540 | 1522 | 357 | 55 | 29 | -1.8%  | 32.7* |
| BF | CTC 55-75, 5     | 0     | 0    | 3399 | 1428 | 303 | 53 | 27 | -14.3% | Dom.  |
| BF | CTC 55-80, 5     | 0     | 0    | 3773 | 1521 | 308 | 55 | 28 | -15.4% | Dom.  |
| BF | CTC 55-85, 5     | 0     | 0    | 4030 | 1582 | 309 | 55 | 29 | -16.5% | Dom.  |
| BF | CTC 50-75, 5     | 0     | 0    | 4196 | 1639 | 354 | 58 | 30 | -5.7%  | Dom.  |
| BF | CTC 50-80, 5     | 0     | 0    | 4570 | 1731 | 358 | 60 | 31 | -6.9%  | Dom.  |
| BF | CTC 50-85, 5     | 0     | 0    | 4826 | 1793 | 359 | 60 | 31 | -8.1%  | Dom.  |
| BF | CTC 45-75, 5     | 0     | 0    | 5024 | 1829 | 394 | 62 | 31 | 0%     | 10.0  |
| BF | CTC 45-80, 5     | 0     | 0    | 5398 | 1921 | 398 | 63 | 32 | 0%     | 22.7  |
| BF | CTC 45-85, 5     | 0     | 0    | 5654 | 1982 | 399 | 64 | 33 | 0%     | 54.7  |

Abbreviations: BF = black female; COL = colonoscopy; CRC = colorectal cancer; CTC = computed tomographic colonography; Dom. = dominated strategy; ER = efficiency ratio; FIT = fecal immunochemical test; FIT-DNA = multitarget stool DNA test; HSgFOBT = high-sensitivity guaiac-based fecal occult blood test; LYG = life-years gained; SIG = flexible sigmoidoscopy.

<sup>a</sup> Both models evaluated two scenarios for CRC risk: one in which age-specific risks were assumed to have remained stable since the early screening period in the U.S. (1975-1979 for SimCRC; 1990-1994 for MISCAN), and one in which risks were assumed to have increased proportional to observed trends among adults under age 40 years. Strategies for each model and scenario are ordered successively by screening modality, interval (↓), end age (↑), and start age (↓).

<sup>b</sup> Total number of colonoscopies performed per 1000 40-year-olds, including diagnostic colonoscopies and potential surveillance colonoscopies after adenoma removal. The number of screening-related complications ranged from 1.6 to 18.9 per 1000 40-year-olds across models, scenarios, and strategies.

<sup>c</sup> Including deaths from complications of screening.

<sup>d</sup> The difference in LYG compared to (combinations of) adjacent strategies on the efficient frontier. Near-efficient strategies have a loss in LYG of less than 2% before rounding. For the least intensive screening strategy evaluated within each class of screening modality, the difference was zero by definition.

<sup>e</sup> Efficiency ratio = incremental number of colonoscopies/LYG with respect to the next less effective strategy on the efficient frontier, a burden-to-benefit ratio. Only calculated for efficient and near-efficient strategies (marked with an asterisk\*), i.e. strategies within 2% from the efficient frontier among all evaluated strategies within a class of screening modalities (colonoscopy, stool-based, sigmoidoscopy, and CTC).

**Supplementary Table 5. Lifetime Number of Colonoscopies and LYG for All Evaluated Screening Strategies under Two Scenarios for CRC Risk, by Model, in White Males <sup>a</sup>**

| Sub-group                                   | Modality, and age to begin-end screening, interval, y | Outcomes per 1000 40-year-olds |      |      |                   |     |                   |                                 | Relative distance from efficient frontier <sup>d</sup> | ER <sup>e</sup> |
|---------------------------------------------|-------------------------------------------------------|--------------------------------|------|------|-------------------|-----|-------------------|---------------------------------|--------------------------------------------------------|-----------------|
|                                             |                                                       | Stool tests                    | SIGs | CTCs | COLs <sup>b</sup> | LYG | CRC cases averted | CRC deaths averted <sup>c</sup> |                                                        |                 |
| <b>MISCAN - Scenario 1: Stable CRC risk</b> |                                                       |                                |      |      |                   |     |                   |                                 |                                                        |                 |
| WM                                          | No screening                                          | 0                              | 0    | 0    | 71                | 0   | 0                 | 0                               | -                                                      | -               |
| WM                                          | COL 55-75, 15                                         | 0                              | 0    | 0    | 3001              | 197 | 39                | 20                              | 0%                                                     | 14.8            |
| WM                                          | COL 55-80, 15                                         | 0                              | 0    | 0    | 3001              | 197 | 39                | 20                              | 0%                                                     | 14.8            |
| WM                                          | COL 55-85, 15                                         | 0                              | 0    | 0    | 3240              | 198 | 39                | 20                              | -3.8%                                                  | Dom.            |
| WM                                          | COL 50-75, 15                                         | 0                              | 0    | 0    | 3264              | 207 | 39                | 20                              | 0%                                                     | 26.4            |
| WM                                          | COL 50-80, 15                                         | 0                              | 0    | 0    | 3657              | 212 | 41                | 21                              | -2.3%                                                  | Dom.            |
| WM                                          | COL 50-85, 15                                         | 0                              | 0    | 0    | 3657              | 212 | 41                | 21                              | -2.3%                                                  | Dom.            |
| WM                                          | COL 45-75, 15                                         | 0                              | 0    | 0    | 3979              | 218 | 41                | 21                              | -3.4%                                                  | Dom.            |
| WM                                          | COL 45-80, 15                                         | 0                              | 0    | 0    | 3979              | 218 | 41                | 21                              | -3.4%                                                  | Dom.            |
| WM                                          | COL 45-85, 15                                         | 0                              | 0    | 0    | 3979              | 218 | 41                | 21                              | -3.4%                                                  | Dom.            |
| WM                                          | COL 55-75, 10                                         | 0                              | 0    | 0    | 3598              | 209 | 42                | 21                              | -3.3%                                                  | Dom.            |
| WM                                          | COL 55-80, 10                                         | 0                              | 0    | 0    | 3598              | 209 | 42                | 21                              | -3.3%                                                  | Dom.            |
| WM                                          | COL 55-85, 10                                         | 0                              | 0    | 0    | 3813              | 210 | 42                | 21                              | -5.4%                                                  | Dom.            |
| WM                                          | COL 50-75, 10                                         | 0                              | 0    | 0    | 4007              | 227 | 43                | 21                              | 0%                                                     | 38.6            |
| WM                                          | COL 50-80, 10                                         | 0                              | 0    | 0    | 4357              | 230 | 44                | 22                              | -0.8%                                                  | 116.6*          |
| WM                                          | COL 50-85, 10                                         | 0                              | 0    | 0    | 4357              | 230 | 44                | 22                              | -0.8%                                                  | 116.6*          |
| WM                                          | COL 45-75, 10                                         | 0                              | 0    | 0    | 4797              | 238 | 45                | 22                              | 0%                                                     | 72.0            |
| WM                                          | COL 45-80, 10                                         | 0                              | 0    | 0    | 4797              | 238 | 45                | 22                              | 0%                                                     | 72.0            |
| WM                                          | COL 45-85, 10                                         | 0                              | 0    | 0    | 5012              | 238 | 45                | 22                              | -0.6%                                                  | 351.8*          |
| WM                                          | COL 55-75, 5                                          | 0                              | 0    | 0    | 4786              | 221 | 45                | 22                              | -7.1%                                                  | Dom.            |
| WM                                          | COL 55-80, 5                                          | 0                              | 0    | 0    | 5098              | 222 | 45                | 22                              | -7.6%                                                  | Dom.            |
| WM                                          | COL 55-85, 5                                          | 0                              | 0    | 0    | 5285              | 222 | 45                | 22                              | -8.3%                                                  | Dom.            |
| WM                                          | COL 50-75, 5                                          | 0                              | 0    | 0    | 5807              | 243 | 47                | 23                              | -1.5%                                                  | 181.2*          |
| WM                                          | COL 50-80, 5                                          | 0                              | 0    | 0    | 6119              | 244 | 48                | 23                              | -2.1%                                                  | Dom.            |
| WM                                          | COL 50-85, 5                                          | 0                              | 0    | 0    | 6305              | 245 | 48                | 23                              | -2.8%                                                  | Dom.            |
| WM                                          | COL 45-75, 5                                          | 0                              | 0    | 0    | 6844              | 257 | 48                | 23                              | 0%                                                     | 108.1           |
| WM                                          | COL 45-80, 5                                          | 0                              | 0    | 0    | 7157              | 258 | 49                | 24                              | 0%                                                     | 225.9           |
| WM                                          | COL 45-85, 5                                          | 0                              | 0    | 0    | 7343              | 258 | 49                | 24                              | 0%                                                     | 1902.6          |
| WM                                          | FIT 55-75, 3                                          | 5146                           | 0    | 0    | 796               | 142 | 16                | 14                              | 0%                                                     | 5.1             |
| WM                                          | FIT 55-80, 3                                          | 6037                           | 0    | 0    | 876               | 153 | 17                | 15                              | 0%                                                     | 7.6             |
| WM                                          | FIT 55-85, 3                                          | 6615                           | 0    | 0    | 922               | 156 | 17                | 16                              | -1.5%                                                  | 13.3*           |
| WM                                          | FIT 50-75, 3                                          | 6689                           | 0    | 0    | 947               | 162 | 18                | 15                              | 0%                                                     | 7.9             |
| WM                                          | FIT 50-80, 3                                          | 7524                           | 0    | 0    | 1019              | 171 | 19                | 17                              | 0%                                                     | 8.0             |
| WM                                          | FIT 50-85, 3                                          | 7824                           | 0    | 0    | 1042              | 172 | 19                | 17                              | -0.2%                                                  | 12.9*           |
| WM                                          | FIT 45-75, 3                                          | 8274                           | 0    | 0    | 1074              | 173 | 20                | 16                              | -1.4%                                                  | 21.1*           |
| WM                                          | FIT 45-80, 3                                          | 8702                           | 0    | 0    | 1109              | 178 | 20                | 16                              | -0.5%                                                  | 12.5*           |
| WM                                          | FIT 45-85, 3                                          | 9327                           | 0    | 0    | 1158              | 182 | 19                | 17                              | -0.6%                                                  | 12.2*           |

|    |                  |       |   |   |      |     |    |    |        |        |
|----|------------------|-------|---|---|------|-----|----|----|--------|--------|
| WM | FIT 55-75, 2     | 7481  | 0 | 0 | 1030 | 167 | 21 | 16 | -3.0%  | Dom.   |
| WM | FIT 55-80, 2     | 8279  | 0 | 0 | 1091 | 173 | 22 | 17 | -2.4%  | Dom.   |
| WM | FIT 55-85, 2     | 9107  | 0 | 0 | 1148 | 176 | 22 | 18 | -3.2%  | Dom.   |
| WM | FIT 50-75, 2     | 9204  | 0 | 0 | 1188 | 185 | 23 | 17 | -0.7%  | 12.0*  |
| WM | FIT 50-80, 2     | 10388 | 0 | 0 | 1275 | 194 | 24 | 19 | 0%     | 11.0   |
| WM | FIT 50-85, 2     | 10936 | 0 | 0 | 1312 | 196 | 24 | 19 | -0.2%  | 16.5*  |
| WM | FIT 45-75, 2     | 11465 | 0 | 0 | 1354 | 197 | 25 | 18 | -1.0%  | 22.1*  |
| WM | FIT 45-80, 2     | 12251 | 0 | 0 | 1412 | 203 | 25 | 19 | 0%     | 14.4   |
| WM | FIT 45-85, 2     | 13070 | 0 | 0 | 1466 | 207 | 25 | 20 | 0%     | 16.0   |
| WM | FIT 55-75, 1     | 12335 | 0 | 0 | 1437 | 192 | 29 | 19 | -6.2%  | Dom.   |
| WM | FIT 55-80, 1     | 13936 | 0 | 0 | 1534 | 199 | 31 | 20 | -5.3%  | Dom.   |
| WM | FIT 55-85, 1     | 15040 | 0 | 0 | 1595 | 201 | 31 | 20 | -5.5%  | Dom.   |
| WM | FIT 50-75, 1     | 15619 | 0 | 0 | 1693 | 214 | 32 | 20 | -1.3%  | 29.7*  |
| WM | FIT 50-80, 1     | 17205 | 0 | 0 | 1787 | 221 | 33 | 21 | -0.5%  | 23.0*  |
| WM | FIT 50-85, 1     | 18301 | 0 | 0 | 1847 | 223 | 33 | 21 | -0.7%  | 23.6*  |
| WM | FIT 45-75, 1     | 19081 | 0 | 0 | 1915 | 226 | 33 | 20 | -0.8%  | 23.5*  |
| WM | FIT 45-80, 1     | 20659 | 0 | 0 | 2008 | 232 | 34 | 21 | 0%     | 21.4   |
| WM | FIT 45-85, 1     | 21751 | 0 | 0 | 2067 | 234 | 34 | 22 | 0%     | 28.6   |
| WM | FIT-DNA 55-75, 5 | 3495  | 0 | 0 | 1152 | 158 | 22 | 16 | -13.3% | Dom.   |
| WM | FIT-DNA 55-80, 5 | 3861  | 0 | 0 | 1220 | 164 | 22 | 17 | -13.4% | Dom.   |
| WM | FIT-DNA 55-85, 5 | 4096  | 0 | 0 | 1259 | 165 | 22 | 17 | -14.3% | Dom.   |
| WM | FIT-DNA 50-75, 5 | 4308  | 0 | 0 | 1340 | 176 | 24 | 17 | -11.3% | Dom.   |
| WM | FIT-DNA 50-80, 5 | 4670  | 0 | 0 | 1405 | 181 | 24 | 18 | -10.8% | Dom.   |
| WM | FIT-DNA 50-85, 5 | 4904  | 0 | 0 | 1444 | 182 | 24 | 18 | -11.3% | Dom.   |
| WM | FIT-DNA 45-75, 5 | 5156  | 0 | 0 | 1499 | 185 | 25 | 17 | -11.3% | Dom.   |
| WM | FIT-DNA 45-80, 5 | 5517  | 0 | 0 | 1563 | 190 | 25 | 18 | -10.2% | Dom.   |
| WM | FIT-DNA 45-85, 5 | 5750  | 0 | 0 | 1602 | 191 | 25 | 18 | -10.3% | Dom.   |
| WM | FIT-DNA 55-75, 3 | 4427  | 0 | 0 | 1380 | 176 | 26 | 17 | -12.4% | Dom.   |
| WM | FIT-DNA 55-80, 3 | 5129  | 0 | 0 | 1501 | 185 | 28 | 19 | -11.4% | Dom.   |
| WM | FIT-DNA 55-85, 3 | 5577  | 0 | 0 | 1570 | 187 | 28 | 19 | -11.6% | Dom.   |
| WM | FIT-DNA 50-75, 3 | 5701  | 0 | 0 | 1650 | 198 | 29 | 18 | -8.0%  | Dom.   |
| WM | FIT-DNA 50-80, 3 | 6352  | 0 | 0 | 1759 | 205 | 30 | 20 | -6.9%  | Dom.   |
| WM | FIT-DNA 50-85, 3 | 6585  | 0 | 0 | 1794 | 206 | 30 | 20 | -7.0%  | Dom.   |
| WM | FIT-DNA 45-75, 3 | 7017  | 0 | 0 | 1885 | 210 | 31 | 19 | -7.3%  | Dom.   |
| WM | FIT-DNA 45-80, 3 | 7352  | 0 | 0 | 1939 | 213 | 31 | 20 | -6.8%  | Dom.   |
| WM | FIT-DNA 45-85, 3 | 7837  | 0 | 0 | 2014 | 216 | 31 | 20 | -6.8%  | Dom.   |
| WM | FIT-DNA 55-75, 1 | 8705  | 0 | 0 | 2190 | 206 | 37 | 20 | -12.3% | Dom.   |
| WM | FIT-DNA 55-80, 1 | 9690  | 0 | 0 | 2324 | 210 | 38 | 21 | -11.0% | Dom.   |
| WM | FIT-DNA 55-85, 1 | 10380 | 0 | 0 | 2412 | 211 | 39 | 21 | -10.8% | Dom.   |
| WM | FIT-DNA 50-75, 1 | 10885 | 0 | 0 | 2589 | 227 | 40 | 21 | -4.8%  | Dom.   |
| WM | FIT-DNA 50-80, 1 | 11884 | 0 | 0 | 2723 | 231 | 41 | 22 | -3.6%  | Dom.   |
| WM | FIT-DNA 50-85, 1 | 12566 | 0 | 0 | 2809 | 232 | 41 | 22 | -3.4%  | Dom.   |
| WM | FIT-DNA 45-75, 1 | 13234 | 0 | 0 | 2953 | 239 | 41 | 21 | -1.3%  | 194.0* |
| WM | FIT-DNA 45-80, 1 | 14221 | 0 | 0 | 3085 | 243 | 42 | 22 | -0.2%  | 120.7* |
| WM | FIT-DNA 45-85, 1 | 14903 | 0 | 0 | 3171 | 244 | 42 | 22 | 0%     | 114.8  |
| WM | HSgFOBT 55-75, 3 | 4813  | 0 | 0 | 1022 | 141 | 17 | 14 | -17.7% | Dom.   |

|    |                  |       |      |      |      |     |    |    |        |       |
|----|------------------|-------|------|------|------|-----|----|----|--------|-------|
| WM | HSgFOBT 55-80, 3 | 5616  | 0    | 0    | 1128 | 151 | 18 | 15 | -16.5% | Dom.  |
| WM | HSgFOBT 55-85, 3 | 6133  | 0    | 0    | 1188 | 154 | 18 | 16 | -17.3% | Dom.  |
| WM | HSgFOBT 50-75, 3 | 6201  | 0    | 0    | 1248 | 161 | 20 | 15 | -15.8% | Dom.  |
| WM | HSgFOBT 50-80, 3 | 6947  | 0    | 0    | 1342 | 169 | 20 | 17 | -14.6% | Dom.  |
| WM | HSgFOBT 50-85, 3 | 7215  | 0    | 0    | 1373 | 171 | 20 | 17 | -14.7% | Dom.  |
| WM | HSgFOBT 45-75, 3 | 7623  | 0    | 0    | 1445 | 173 | 21 | 16 | -15.8% | Dom.  |
| WM | HSgFOBT 45-80, 3 | 8005  | 0    | 0    | 1492 | 177 | 22 | 17 | -14.8% | Dom.  |
| WM | HSgFOBT 45-85, 3 | 8561  | 0    | 0    | 1557 | 181 | 21 | 17 | -14.2% | Dom.  |
| WM | HSgFOBT 55-75, 2 | 6788  | 0    | 0    | 1339 | 166 | 23 | 16 | -16.3% | Dom.  |
| WM | HSgFOBT 55-80, 2 | 7473  | 0    | 0    | 1420 | 172 | 23 | 17 | -15.8% | Dom.  |
| WM | HSgFOBT 55-85, 2 | 8179  | 0    | 0    | 1497 | 175 | 23 | 18 | -16.0% | Dom.  |
| WM | HSgFOBT 50-75, 2 | 8279  | 0    | 0    | 1580 | 185 | 25 | 17 | -12.6% | Dom.  |
| WM | HSgFOBT 50-80, 2 | 9290  | 0    | 0    | 1697 | 193 | 26 | 19 | -11.1% | Dom.  |
| WM | HSgFOBT 50-85, 2 | 9755  | 0    | 0    | 1747 | 195 | 26 | 19 | -11.1% | Dom.  |
| WM | HSgFOBT 45-75, 2 | 10234 | 0    | 0    | 1837 | 198 | 27 | 18 | -11.7% | Dom.  |
| WM | HSgFOBT 45-80, 2 | 10904 | 0    | 0    | 1914 | 203 | 27 | 19 | -10.8% | Dom.  |
| WM | HSgFOBT 45-85, 2 | 11597 | 0    | 0    | 1987 | 206 | 27 | 20 | -10.9% | Dom.  |
| WM | HSgFOBT 55-75, 1 | 10212 | 0    | 0    | 1858 | 192 | 31 | 19 | -14.6% | Dom.  |
| WM | HSgFOBT 55-80, 1 | 11419 | 0    | 0    | 1984 | 197 | 32 | 20 | -14.5% | Dom.  |
| WM | HSgFOBT 55-85, 1 | 12250 | 0    | 0    | 2064 | 199 | 32 | 20 | -14.9% | Dom.  |
| WM | HSgFOBT 50-75, 1 | 12737 | 0    | 0    | 2221 | 214 | 34 | 20 | -9.0%  | Dom.  |
| WM | HSgFOBT 50-80, 1 | 13937 | 0    | 0    | 2343 | 219 | 35 | 21 | -7.3%  | Dom.  |
| WM | HSgFOBT 50-85, 1 | 14760 | 0    | 0    | 2422 | 221 | 35 | 21 | -6.9%  | Dom.  |
| WM | HSgFOBT 45-75, 1 | 15423 | 0    | 0    | 2545 | 225 | 35 | 20 | -5.4%  | Dom.  |
| WM | HSgFOBT 45-80, 1 | 16615 | 0    | 0    | 2666 | 230 | 36 | 21 | -3.7%  | Dom.  |
| WM | HSgFOBT 45-85, 1 | 17436 | 0    | 0    | 2744 | 232 | 36 | 22 | -3.3%  | Dom.  |
| WM | SIG 55-75, 10    | 0     | 2103 | 0    | 1695 | 171 | 34 | 17 | 0%     | 9.5   |
| WM | SIG 55-80, 10    | 0     | 2103 | 0    | 1695 | 171 | 34 | 17 | 0%     | 9.5   |
| WM | SIG 55-85, 10    | 0     | 2331 | 0    | 1757 | 172 | 34 | 18 | -3.0%  | Dom.  |
| WM | SIG 50-75, 10    | 0     | 2328 | 0    | 1822 | 183 | 35 | 18 | 0%     | 10.0  |
| WM | SIG 50-80, 10    | 0     | 2681 | 0    | 1944 | 188 | 36 | 19 | -0.9%  | 29.2* |
| WM | SIG 50-85, 10    | 0     | 2681 | 0    | 1944 | 188 | 36 | 19 | -0.9%  | 29.2* |
| WM | SIG 45-75, 10    | 0     | 2997 | 0    | 2034 | 191 | 36 | 18 | -1.4%  | 27.9* |
| WM | SIG 45-80, 10    | 0     | 2997 | 0    | 2034 | 191 | 36 | 18 | -1.4%  | 27.9* |
| WM | SIG 45-85, 10    | 0     | 3225 | 0    | 2096 | 192 | 36 | 19 | -2.4%  | Dom.  |
| WM | SIG 55-75, 5     | 0     | 3012 | 0    | 1957 | 185 | 37 | 19 | -2.4%  | Dom.  |
| WM | SIG 55-80, 5     | 0     | 3303 | 0    | 2037 | 187 | 38 | 19 | -3.3%  | Dom.  |
| WM | SIG 55-85, 5     | 0     | 3486 | 0    | 2072 | 188 | 38 | 19 | -4.0%  | Dom.  |
| WM | SIG 50-75, 5     | 0     | 3737 | 0    | 2231 | 203 | 39 | 20 | 0%     | 20.6  |
| WM | SIG 50-80, 5     | 0     | 4026 | 0    | 2310 | 205 | 40 | 20 | -0.6%  | 39.6* |
| WM | SIG 50-85, 5     | 0     | 4209 | 0    | 2345 | 206 | 40 | 20 | -1.1%  | 50.2* |
| WM | SIG 45-75, 5     | 0     | 4522 | 0    | 2452 | 212 | 40 | 20 | 0%     | 24.8  |
| WM | SIG 45-80, 5     | 0     | 4810 | 0    | 2530 | 214 | 41 | 20 | 0%     | 39.7  |
| WM | SIG 45-85, 5     | 0     | 4993 | 0    | 2565 | 214 | 41 | 20 | 0%     | 131.0 |
| WM | CTC 55-75, 10    | 0     | 0    | 2234 | 1159 | 157 | 26 | 16 | 0%     | 6.9   |
| WM | CTC 55-80, 10    | 0     | 0    | 2234 | 1159 | 157 | 26 | 16 | 0%     | 6.9   |

|    |               |   |   |      |      |     |    |    |       |       |
|----|---------------|---|---|------|------|-----|----|----|-------|-------|
| WM | CTC 55-85, 10 | 0 | 0 | 2498 | 1223 | 159 | 26 | 17 | -3.8% | Dom.  |
| WM | CTC 50-75, 10 | 0 | 0 | 2456 | 1223 | 166 | 26 | 15 | 0%    | 7.2   |
| WM | CTC 50-80, 10 | 0 | 0 | 2862 | 1329 | 175 | 28 | 17 | -0.6% | 12.0* |
| WM | CTC 50-85, 10 | 0 | 0 | 2862 | 1329 | 175 | 28 | 17 | -0.6% | 12.0* |
| WM | CTC 45-75, 10 | 0 | 0 | 3171 | 1393 | 176 | 28 | 17 | -3.4% | Dom.  |
| WM | CTC 45-80, 10 | 0 | 0 | 3171 | 1393 | 176 | 28 | 17 | -3.4% | Dom.  |
| WM | CTC 45-85, 10 | 0 | 0 | 3433 | 1456 | 178 | 28 | 17 | -5.1% | Dom.  |
| WM | CTC 55-75, 5  | 0 | 0 | 3320 | 1460 | 188 | 33 | 18 | 0%    | 10.7  |
| WM | CTC 55-80, 5  | 0 | 0 | 3659 | 1531 | 192 | 34 | 19 | -1.1% | 16.7* |
| WM | CTC 55-85, 5  | 0 | 0 | 3877 | 1574 | 193 | 34 | 20 | -2.5% | Dom.  |
| WM | CTC 50-75, 5  | 0 | 0 | 4110 | 1667 | 207 | 35 | 19 | 0%    | 11.0  |
| WM | CTC 50-80, 5  | 0 | 0 | 4447 | 1737 | 211 | 36 | 20 | 0%    | 16.6  |
| WM | CTC 50-85, 5  | 0 | 0 | 4664 | 1779 | 212 | 36 | 20 | -0.5% | 41.7* |
| WM | CTC 45-75, 5  | 0 | 0 | 4940 | 1842 | 216 | 36 | 20 | -0.3% | 21.6* |
| WM | CTC 45-80, 5  | 0 | 0 | 5276 | 1911 | 220 | 37 | 21 | 0%    | 19.3  |
| WM | CTC 45-85, 5  | 0 | 0 | 5492 | 1953 | 221 | 37 | 21 | 0%    | 41.2  |

**MISCAN - Scenario 2: Increased CRC risk**

|    |               |      |   |   |      |     |     |    |       |        |
|----|---------------|------|---|---|------|-----|-----|----|-------|--------|
| WM | No screening  | 0    | 0 | 0 | 149  | 0   | 0   | 0  | -     | -      |
| WM | COL 55-75, 15 | 0    | 0 | 0 | 4093 | 438 | 85  | 44 | 0%    | 9.0    |
| WM | COL 55-80, 15 | 0    | 0 | 0 | 4093 | 438 | 85  | 44 | 0%    | 9.0    |
| WM | COL 55-85, 15 | 0    | 0 | 0 | 4194 | 439 | 85  | 44 | -1.0% | 70.6*  |
| WM | COL 50-75, 15 | 0    | 0 | 0 | 4540 | 463 | 87  | 44 | -0.2% | 17.3*  |
| WM | COL 50-80, 15 | 0    | 0 | 0 | 4746 | 471 | 89  | 46 | -1.3% | 19.8*  |
| WM | COL 50-85, 15 | 0    | 0 | 0 | 4746 | 471 | 89  | 46 | -1.3% | 19.8*  |
| WM | COL 45-75, 15 | 0    | 0 | 0 | 5173 | 483 | 90  | 46 | -3.4% | Dom.   |
| WM | COL 45-80, 15 | 0    | 0 | 0 | 5173 | 483 | 90  | 46 | -3.4% | Dom.   |
| WM | COL 45-85, 15 | 0    | 0 | 0 | 5173 | 483 | 90  | 46 | -3.4% | Dom.   |
| WM | COL 55-75, 10 | 0    | 0 | 0 | 4478 | 458 | 90  | 46 | -0.6% | 18.9*  |
| WM | COL 55-80, 10 | 0    | 0 | 0 | 4478 | 458 | 90  | 46 | -0.6% | 18.9*  |
| WM | COL 55-85, 10 | 0    | 0 | 0 | 4553 | 459 | 90  | 46 | -1.4% | Dom.   |
| WM | COL 50-75, 10 | 0    | 0 | 0 | 5102 | 498 | 93  | 47 | 0%    | 16.7   |
| WM | COL 50-80, 10 | 0    | 0 | 0 | 5252 | 502 | 95  | 48 | -0.1% | 38.9*  |
| WM | COL 50-85, 10 | 0    | 0 | 0 | 5252 | 502 | 95  | 48 | -0.1% | 38.9*  |
| WM | COL 45-75, 10 | 0    | 0 | 0 | 5846 | 520 | 96  | 48 | 0%    | 33.5   |
| WM | COL 45-80, 10 | 0    | 0 | 0 | 5846 | 520 | 96  | 48 | 0%    | 33.5   |
| WM | COL 45-85, 10 | 0    | 0 | 0 | 5920 | 521 | 96  | 49 | -0.2% | 108.8* |
| WM | COL 55-75, 5  | 0    | 0 | 0 | 5125 | 477 | 94  | 47 | -4.4% | Dom.   |
| WM | COL 55-80, 5  | 0    | 0 | 0 | 5231 | 478 | 95  | 48 | -4.7% | Dom.   |
| WM | COL 55-85, 5  | 0    | 0 | 0 | 5276 | 478 | 95  | 48 | -4.9% | Dom.   |
| WM | COL 50-75, 5  | 0    | 0 | 0 | 6146 | 526 | 100 | 50 | -0.3% | 48.5*  |
| WM | COL 50-80, 5  | 0    | 0 | 0 | 6251 | 528 | 100 | 50 | -0.5% | 52.3*  |
| WM | COL 50-85, 5  | 0    | 0 | 0 | 6297 | 528 | 100 | 50 | -0.7% | 57.5*  |
| WM | COL 45-75, 5  | 0    | 0 | 0 | 7182 | 554 | 102 | 51 | 0%    | 39.5   |
| WM | COL 45-80, 5  | 0    | 0 | 0 | 7288 | 556 | 103 | 51 | 0%    | 67.2   |
| WM | COL 45-85, 5  | 0    | 0 | 0 | 7334 | 556 | 103 | 51 | 0%    | 555.4  |
| WM | FIT 55-75, 3  | 4750 | 0 | 0 | 1416 | 311 | 37  | 30 | 0%    | 4.1    |

|    |                  |       |   |   |      |     |    |    |        |       |
|----|------------------|-------|---|---|------|-----|----|----|--------|-------|
| WM | FIT 55-80, 3     | 5418  | 0 | 0 | 1531 | 333 | 39 | 34 | 0%     | 5.2   |
| WM | FIT 55-85, 3     | 5804  | 0 | 0 | 1589 | 339 | 38 | 36 | -0.9%  | 8.8*  |
| WM | FIT 50-75, 3     | 6165  | 0 | 0 | 1661 | 353 | 42 | 33 | -0.5%  | 6.4*  |
| WM | FIT 50-80, 3     | 6771  | 0 | 0 | 1760 | 372 | 43 | 36 | 0%     | 5.9   |
| WM | FIT 50-85, 3     | 6970  | 0 | 0 | 1790 | 375 | 43 | 37 | -0.1%  | 8.5*  |
| WM | FIT 45-75, 3     | 7643  | 0 | 0 | 1853 | 378 | 45 | 35 | -1.6%  | 15.0* |
| WM | FIT 45-80, 3     | 7953  | 0 | 0 | 1902 | 387 | 45 | 36 | -0.7%  | 9.0*  |
| WM | FIT 45-85, 3     | 8371  | 0 | 0 | 1964 | 395 | 45 | 38 | -0.7%  | 8.6*  |
| WM | FIT 55-75, 2     | 6661  | 0 | 0 | 1774 | 364 | 48 | 36 | -2.5%  | Dom.  |
| WM | FIT 55-80, 2     | 7209  | 0 | 0 | 1852 | 377 | 50 | 38 | -1.8%  | 17.8* |
| WM | FIT 55-85, 2     | 7721  | 0 | 0 | 1916 | 383 | 50 | 40 | -2.2%  | Dom.  |
| WM | FIT 50-75, 2     | 8277  | 0 | 0 | 2027 | 402 | 53 | 37 | -1.0%  | 8.6*  |
| WM | FIT 50-80, 2     | 9079  | 0 | 0 | 2137 | 421 | 55 | 41 | 0%     | 7.6   |
| WM | FIT 50-85, 2     | 9412  | 0 | 0 | 2177 | 425 | 55 | 42 | -0.1%  | 9.8*  |
| WM | FIT 45-75, 2     | 10343 | 0 | 0 | 2270 | 431 | 56 | 39 | -0.9%  | 12.8* |
| WM | FIT 45-80, 2     | 10870 | 0 | 0 | 2341 | 443 | 57 | 41 | 0%     | 9.3   |
| WM | FIT 45-85, 2     | 11365 | 0 | 0 | 2401 | 449 | 57 | 43 | 0%     | 9.5   |
| WM | FIT 55-75, 1     | 10514 | 0 | 0 | 2348 | 420 | 65 | 41 | -5.2%  | Dom.  |
| WM | FIT 55-80, 1     | 11486 | 0 | 0 | 2448 | 433 | 68 | 43 | -4.5%  | Dom.  |
| WM | FIT 55-85, 1     | 12073 | 0 | 0 | 2501 | 436 | 68 | 44 | -4.5%  | Dom.  |
| WM | FIT 50-75, 1     | 13419 | 0 | 0 | 2724 | 468 | 71 | 43 | -1.4%  | 17.1* |
| WM | FIT 50-80, 1     | 14362 | 0 | 0 | 2818 | 480 | 73 | 46 | -0.5%  | 13.7* |
| WM | FIT 50-85, 1     | 14937 | 0 | 0 | 2869 | 483 | 74 | 46 | -0.6%  | 13.8* |
| WM | FIT 45-75, 1     | 16592 | 0 | 0 | 3033 | 495 | 74 | 45 | -0.8%  | 13.8* |
| WM | FIT 45-80, 1     | 17522 | 0 | 0 | 3125 | 506 | 76 | 47 | 0%     | 12.7  |
| WM | FIT 45-85, 1     | 18090 | 0 | 0 | 3174 | 510 | 77 | 47 | 0%     | 13.8  |
| WM | FIT-DNA 55-75, 5 | 3141  | 0 | 0 | 1904 | 347 | 49 | 35 | -11.0% | Dom.  |
| WM | FIT-DNA 55-80, 5 | 3385  | 0 | 0 | 1980 | 357 | 50 | 37 | -10.7% | Dom.  |
| WM | FIT-DNA 55-85, 5 | 3524  | 0 | 0 | 2019 | 360 | 49 | 38 | -11.2% | Dom.  |
| WM | FIT-DNA 50-75, 5 | 3880  | 0 | 0 | 2187 | 384 | 53 | 37 | -10.0% | Dom.  |
| WM | FIT-DNA 50-80, 5 | 4117  | 0 | 0 | 2260 | 393 | 54 | 39 | -9.4%  | Dom.  |
| WM | FIT-DNA 50-85, 5 | 4254  | 0 | 0 | 2297 | 396 | 53 | 39 | -9.7%  | Dom.  |
| WM | FIT-DNA 45-75, 5 | 4674  | 0 | 0 | 2413 | 405 | 56 | 38 | -10.1% | Dom.  |
| WM | FIT-DNA 45-80, 5 | 4908  | 0 | 0 | 2484 | 414 | 56 | 40 | -9.1%  | Dom.  |
| WM | FIT-DNA 45-85, 5 | 5044  | 0 | 0 | 2521 | 416 | 56 | 40 | -9.2%  | Dom.  |
| WM | FIT-DNA 55-75, 3 | 3948  | 0 | 0 | 2246 | 387 | 59 | 38 | -10.6% | Dom.  |
| WM | FIT-DNA 55-80, 3 | 4400  | 0 | 0 | 2375 | 403 | 62 | 41 | -9.7%  | Dom.  |
| WM | FIT-DNA 55-85, 3 | 4648  | 0 | 0 | 2435 | 407 | 63 | 42 | -9.9%  | Dom.  |
| WM | FIT-DNA 50-75, 3 | 5056  | 0 | 0 | 2635 | 434 | 65 | 41 | -7.2%  | Dom.  |
| WM | FIT-DNA 50-80, 3 | 5459  | 0 | 0 | 2744 | 447 | 68 | 43 | -6.1%  | Dom.  |
| WM | FIT-DNA 50-85, 3 | 5587  | 0 | 0 | 2775 | 449 | 68 | 44 | -6.1%  | Dom.  |
| WM | FIT-DNA 45-75, 3 | 6240  | 0 | 0 | 2951 | 460 | 68 | 42 | -6.6%  | Dom.  |
| WM | FIT-DNA 45-80, 3 | 6446  | 0 | 0 | 3005 | 466 | 70 | 43 | -6.1%  | Dom.  |
| WM | FIT-DNA 45-85, 3 | 6716  | 0 | 0 | 3070 | 472 | 70 | 45 | -6.0%  | Dom.  |
| WM | FIT-DNA 55-75, 1 | 7075  | 0 | 0 | 3227 | 451 | 81 | 44 | -11.6% | Dom.  |
| WM | FIT-DNA 55-80, 1 | 7565  | 0 | 0 | 3321 | 458 | 83 | 46 | -10.6% | Dom.  |

|    |                  |       |      |   |      |     |    |    |        |       |
|----|------------------|-------|------|---|------|-----|----|----|--------|-------|
| WM | FIT-DNA 55-85, 1 | 7858  | 0    | 0 | 3371 | 459 | 84 | 46 | -10.4% | Dom.  |
| WM | FIT-DNA 50-75, 1 | 8916  | 0    | 0 | 3756 | 497 | 87 | 47 | -4.3%  | Dom.  |
| WM | FIT-DNA 50-80, 1 | 9402  | 0    | 0 | 3848 | 503 | 88 | 48 | -3.4%  | Dom.  |
| WM | FIT-DNA 50-85, 1 | 9687  | 0    | 0 | 3896 | 505 | 89 | 48 | -3.3%  | Dom.  |
| WM | FIT-DNA 45-75, 1 | 11006 | 0    | 0 | 4210 | 522 | 89 | 47 | -1.0%  | 85.7* |
| WM | FIT-DNA 45-80, 1 | 11484 | 0    | 0 | 4299 | 528 | 91 | 49 | -0.2%  | 61.9* |
| WM | FIT-DNA 45-85, 1 | 11768 | 0    | 0 | 4347 | 529 | 91 | 49 | 0%     | 58.9  |
| WM | HSgFOBT 55-75, 3 | 4485  | 0    | 0 | 1647 | 308 | 39 | 30 | -12.6% | Dom.  |
| WM | HSgFOBT 55-80, 3 | 5082  | 0    | 0 | 1773 | 328 | 41 | 34 | -12.0% | Dom.  |
| WM | HSgFOBT 55-85, 3 | 5419  | 0    | 0 | 1835 | 334 | 40 | 35 | -12.3% | Dom.  |
| WM | HSgFOBT 50-75, 3 | 5740  | 0    | 0 | 1983 | 353 | 45 | 33 | -12.0% | Dom.  |
| WM | HSgFOBT 50-80, 3 | 6271  | 0    | 0 | 2090 | 369 | 46 | 36 | -10.9% | Dom.  |
| WM | HSgFOBT 50-85, 3 | 6443  | 0    | 0 | 2121 | 372 | 46 | 37 | -11.1% | Dom.  |
| WM | HSgFOBT 45-75, 3 | 7045  | 0    | 0 | 2260 | 379 | 48 | 35 | -12.8% | Dom.  |
| WM | HSgFOBT 45-80, 3 | 7316  | 0    | 0 | 2312 | 387 | 49 | 37 | -12.0% | Dom.  |
| WM | HSgFOBT 45-85, 3 | 7676  | 0    | 0 | 2377 | 394 | 48 | 38 | -11.7% | Dom.  |
| WM | HSgFOBT 55-75, 2 | 6098  | 0    | 0 | 2085 | 363 | 51 | 36 | -12.3% | Dom.  |
| WM | HSgFOBT 55-80, 2 | 6555  | 0    | 0 | 2170 | 374 | 52 | 38 | -11.8% | Dom.  |
| WM | HSgFOBT 55-85, 2 | 6971  | 0    | 0 | 2238 | 380 | 52 | 40 | -12.0% | Dom.  |
| WM | HSgFOBT 50-75, 2 | 7465  | 0    | 0 | 2444 | 405 | 57 | 38 | -10.6% | Dom.  |
| WM | HSgFOBT 50-80, 2 | 8122  | 0    | 0 | 2562 | 420 | 58 | 41 | -9.0%  | Dom.  |
| WM | HSgFOBT 50-85, 2 | 8389  | 0    | 0 | 2604 | 424 | 58 | 42 | -8.9%  | Dom.  |
| WM | HSgFOBT 45-75, 2 | 9211  | 0    | 0 | 2792 | 434 | 60 | 40 | -9.6%  | Dom.  |
| WM | HSgFOBT 45-80, 2 | 9639  | 0    | 0 | 2868 | 444 | 62 | 42 | -8.7%  | Dom.  |
| WM | HSgFOBT 45-85, 2 | 10033 | 0    | 0 | 2930 | 449 | 61 | 43 | -8.5%  | Dom.  |
| WM | HSgFOBT 55-75, 1 | 8811  | 0    | 0 | 2770 | 421 | 68 | 42 | -12.0% | Dom.  |
| WM | HSgFOBT 55-80, 1 | 9493  | 0    | 0 | 2873 | 430 | 70 | 43 | -11.5% | Dom.  |
| WM | HSgFOBT 55-85, 1 | 9895  | 0    | 0 | 2927 | 433 | 71 | 44 | -11.7% | Dom.  |
| WM | HSgFOBT 50-75, 1 | 10968 | 0    | 0 | 3269 | 468 | 75 | 44 | -8.4%  | Dom.  |
| WM | HSgFOBT 50-80, 1 | 11624 | 0    | 0 | 3365 | 477 | 77 | 46 | -6.9%  | Dom.  |
| WM | HSgFOBT 50-85, 1 | 12014 | 0    | 0 | 3416 | 480 | 77 | 46 | -6.6%  | Dom.  |
| WM | HSgFOBT 45-75, 1 | 13359 | 0    | 0 | 3692 | 495 | 78 | 45 | -4.5%  | Dom.  |
| WM | HSgFOBT 45-80, 1 | 14003 | 0    | 0 | 3786 | 504 | 80 | 47 | -3.1%  | Dom.  |
| WM | HSgFOBT 45-85, 1 | 14387 | 0    | 0 | 3836 | 506 | 80 | 47 | -2.8%  | Dom.  |
| WM | SIG 55-75, 10    | 0     | 1676 | 0 | 3228 | 408 | 80 | 42 | 0%     | 7.6   |
| WM | SIG 55-80, 10    | 0     | 1676 | 0 | 3228 | 408 | 80 | 42 | 0%     | 7.6   |
| WM | SIG 55-85, 10    | 0     | 1767 | 0 | 3280 | 409 | 80 | 42 | -1.1%  | 41.4* |
| WM | SIG 50-75, 10    | 0     | 1934 | 0 | 3513 | 439 | 82 | 42 | 0%     | 9.1   |
| WM | SIG 50-80, 10    | 0     | 2095 | 0 | 3637 | 446 | 84 | 44 | -0.7%  | 19.0* |
| WM | SIG 50-85, 10    | 0     | 2095 | 0 | 3637 | 446 | 84 | 44 | -0.7%  | 19.0* |
| WM | SIG 45-75, 10    | 0     | 2451 | 0 | 3825 | 457 | 85 | 44 | -1.4%  | 17.4* |
| WM | SIG 45-80, 10    | 0     | 2451 | 0 | 3825 | 457 | 85 | 44 | -1.4%  | 17.4* |
| WM | SIG 45-85, 10    | 0     | 2541 | 0 | 3876 | 458 | 85 | 44 | -1.9%  | 18.9* |
| WM | SIG 55-75, 5     | 0     | 2157 | 0 | 3504 | 432 | 85 | 44 | -1.3%  | 11.2* |
| WM | SIG 55-80, 5     | 0     | 2270 | 0 | 3571 | 435 | 86 | 44 | -1.9%  | Dom.  |
| WM | SIG 55-85, 5     | 0     | 2328 | 0 | 3590 | 436 | 86 | 44 | -2.1%  | Dom.  |



|    |               |   |      |      |      |     |    |    |       |       |
|----|---------------|---|------|------|------|-----|----|----|-------|-------|
| WM | SIG 50-75, 5  | 0 | 2718 | 0    | 3959 | 474 | 89 | 46 | 0%    | 12.8  |
| WM | SIG 50-80, 5  | 0 | 2829 | 0    | 4024 | 477 | 90 | 46 | -0.2% | 22.6* |
| WM | SIG 50-85, 5  | 0 | 2887 | 0    | 4043 | 477 | 90 | 46 | -0.4% | 26.2* |
| WM | SIG 45-75, 5  | 0 | 3389 | 0    | 4302 | 494 | 91 | 46 | 0%    | 16.9  |
| WM | SIG 45-80, 5  | 0 | 3500 | 0    | 4367 | 497 | 92 | 47 | 0%    | 23.0  |
| WM | SIG 45-85, 5  | 0 | 3558 | 0    | 4385 | 497 | 92 | 47 | 0%    | 66.2  |
| WM | CTC 55-75, 10 | 0 | 0    | 1995 | 2033 | 345 | 58 | 35 | 0%    | 5.5   |
| WM | CTC 55-80, 10 | 0 | 0    | 1995 | 2033 | 345 | 58 | 35 | 0%    | 5.5   |
| WM | CTC 55-85, 10 | 0 | 0    | 2156 | 2105 | 350 | 58 | 36 | -2.0% | Dom.  |
| WM | CTC 50-75, 10 | 0 | 0    | 2255 | 2149 | 364 | 58 | 35 | 0%    | 6.2   |
| WM | CTC 50-80, 10 | 0 | 0    | 2526 | 2282 | 381 | 61 | 38 | -1.0% | 7.7*  |
| WM | CTC 50-85, 10 | 0 | 0    | 2526 | 2282 | 381 | 61 | 38 | -1.0% | 7.7*  |
| WM | CTC 45-75, 10 | 0 | 0    | 2875 | 2385 | 386 | 62 | 37 | -3.9% | Dom.  |
| WM | CTC 45-80, 10 | 0 | 0    | 2875 | 2385 | 386 | 62 | 37 | -3.9% | Dom.  |
| WM | CTC 45-85, 10 | 0 | 0    | 3033 | 2455 | 390 | 62 | 38 | -5.4% | Dom.  |
| WM | CTC 55-75, 5  | 0 | 0    | 2836 | 2449 | 412 | 72 | 41 | 0%    | 6.3   |
| WM | CTC 55-80, 5  | 0 | 0    | 3036 | 2522 | 420 | 74 | 43 | -0.4% | 9.5*  |
| WM | CTC 55-85, 5  | 0 | 0    | 3151 | 2560 | 421 | 75 | 43 | -1.1% | 11.7* |
| WM | CTC 50-75, 5  | 0 | 0    | 3542 | 2757 | 452 | 76 | 43 | 0%    | 7.7   |
| WM | CTC 50-80, 5  | 0 | 0    | 3740 | 2828 | 459 | 78 | 44 | 0%    | 9.5   |
| WM | CTC 50-85, 5  | 0 | 0    | 3852 | 2864 | 461 | 79 | 45 | -0.4% | 22.3* |
| WM | CTC 45-75, 5  | 0 | 0    | 4315 | 2999 | 474 | 78 | 44 | -0.2% | 11.8* |
| WM | CTC 45-80, 5  | 0 | 0    | 4510 | 3069 | 481 | 80 | 45 | 0%    | 11.0  |
| WM | CTC 45-85, 5  | 0 | 0    | 4622 | 3105 | 483 | 81 | 46 | 0%    | 21.9  |

**SimCRC - Scenario 1: Stable CRC risk**

|    |               |   |   |   |      |     |    |    |        |        |
|----|---------------|---|---|---|------|-----|----|----|--------|--------|
| WM | No screening  | 0 | 0 | 0 | 79   | 0   | 0  | 0  | -      | -      |
| WM | COL 55-75, 15 | 0 | 0 | 0 | 3060 | 250 | 57 | 25 | 0%     | 11.9   |
| WM | COL 55-80, 15 | 0 | 0 | 0 | 3060 | 250 | 57 | 25 | 0%     | 11.9   |
| WM | COL 55-85, 15 | 0 | 0 | 0 | 3299 | 252 | 57 | 25 | -9.5%  | Dom.   |
| WM | COL 50-75, 15 | 0 | 0 | 0 | 3301 | 278 | 59 | 25 | 0%     | 8.7    |
| WM | COL 50-80, 15 | 0 | 0 | 0 | 3719 | 283 | 61 | 27 | -3.3%  | Dom.   |
| WM | COL 50-85, 15 | 0 | 0 | 0 | 3719 | 283 | 61 | 27 | -3.3%  | Dom.   |
| WM | COL 45-75, 15 | 0 | 0 | 0 | 4098 | 307 | 64 | 27 | 0%     | 28.0   |
| WM | COL 45-80, 15 | 0 | 0 | 0 | 4098 | 307 | 64 | 27 | 0%     | 28.0   |
| WM | COL 45-85, 15 | 0 | 0 | 0 | 4098 | 307 | 64 | 27 | 0%     | 28.0   |
| WM | COL 55-75, 10 | 0 | 0 | 0 | 3685 | 261 | 60 | 26 | -10.5% | Dom.   |
| WM | COL 55-80, 10 | 0 | 0 | 0 | 3685 | 261 | 60 | 26 | -10.5% | Dom.   |
| WM | COL 55-85, 10 | 0 | 0 | 0 | 3883 | 262 | 60 | 26 | -12.4% | Dom.   |
| WM | COL 50-75, 10 | 0 | 0 | 0 | 4094 | 294 | 64 | 27 | -4.0%  | Dom.   |
| WM | COL 50-80, 10 | 0 | 0 | 0 | 4436 | 297 | 65 | 28 | -5.2%  | Dom.   |
| WM | COL 50-85, 10 | 0 | 0 | 0 | 4436 | 297 | 65 | 28 | -5.2%  | Dom.   |
| WM | COL 45-75, 10 | 0 | 0 | 0 | 4918 | 322 | 68 | 29 | 0%     | 51.8   |
| WM | COL 45-80, 10 | 0 | 0 | 0 | 4918 | 322 | 68 | 29 | 0%     | 51.8   |
| WM | COL 45-85, 10 | 0 | 0 | 0 | 5116 | 323 | 68 | 29 | -0.2%  | 385.3* |
| WM | COL 55-75, 5  | 0 | 0 | 0 | 4884 | 269 | 63 | 27 | -16.4% | Dom.   |
| WM | COL 55-80, 5  | 0 | 0 | 0 | 5156 | 270 | 63 | 27 | -16.7% | Dom.   |

|    |                  |       |   |   |      |     |    |    |        |        |
|----|------------------|-------|---|---|------|-----|----|----|--------|--------|
| WM | COL 55-85, 5     | 0     | 0 | 0 | 5316 | 270 | 63 | 27 | -16.9% | Dom.   |
| WM | COL 50-75, 5     | 0     | 0 | 0 | 5915 | 306 | 68 | 28 | -6.7%  | Dom.   |
| WM | COL 50-80, 5     | 0     | 0 | 0 | 6187 | 306 | 68 | 28 | -6.9%  | Dom.   |
| WM | COL 50-85, 5     | 0     | 0 | 0 | 6347 | 306 | 68 | 29 | -7.1%  | Dom.   |
| WM | COL 45-75, 5     | 0     | 0 | 0 | 6963 | 333 | 71 | 29 | 0%     | 191.3  |
| WM | COL 45-80, 5     | 0     | 0 | 0 | 7235 | 334 | 71 | 30 | 0%     | 423.8  |
| WM | COL 45-85, 5     | 0     | 0 | 0 | 7396 | 334 | 71 | 30 | 0%     | 1396.2 |
| WM | FIT 55-75, 3     | 5158  | 0 | 0 | 891  | 195 | 31 | 18 | 0%     | 4.2    |
| WM | FIT 55-80, 3     | 6025  | 0 | 0 | 996  | 207 | 34 | 21 | -4.1%  | Dom.   |
| WM | FIT 55-85, 3     | 6522  | 0 | 0 | 1053 | 211 | 34 | 21 | -7.5%  | Dom.   |
| WM | FIT 50-75, 3     | 6708  | 0 | 0 | 1067 | 231 | 36 | 21 | 0%     | 4.9    |
| WM | FIT 50-80, 3     | 7441  | 0 | 0 | 1155 | 240 | 38 | 22 | -2.6%  | Dom.   |
| WM | FIT 50-85, 3     | 7799  | 0 | 0 | 1194 | 242 | 38 | 23 | -4.3%  | Dom.   |
| WM | FIT 45-75, 3     | 8194  | 0 | 0 | 1213 | 256 | 40 | 22 | 0%     | 5.7    |
| WM | FIT 45-80, 3     | 8716  | 0 | 0 | 1270 | 262 | 41 | 23 | 0%     | 9.1    |
| WM | FIT 45-85, 3     | 9293  | 0 | 0 | 1335 | 267 | 41 | 24 | -0.5%  | 15.9*  |
| WM | FIT 55-75, 2     | 7358  | 0 | 0 | 1153 | 223 | 39 | 21 | -9.4%  | Dom.   |
| WM | FIT 55-80, 2     | 8113  | 0 | 0 | 1233 | 229 | 40 | 23 | -11.4% | Dom.   |
| WM | FIT 55-85, 2     | 8874  | 0 | 0 | 1307 | 232 | 41 | 23 | -12.5% | Dom.   |
| WM | FIT 50-75, 2     | 9061  | 0 | 0 | 1325 | 254 | 43 | 23 | -4.8%  | Dom.   |
| WM | FIT 50-80, 2     | 10180 | 0 | 0 | 1440 | 263 | 45 | 24 | -4.7%  | Dom.   |
| WM | FIT 50-85, 2     | 10684 | 0 | 0 | 1489 | 265 | 45 | 25 | -5.4%  | Dom.   |
| WM | FIT 45-75, 2     | 11274 | 0 | 0 | 1522 | 283 | 47 | 24 | 0%     | 12.2   |
| WM | FIT 45-80, 2     | 12017 | 0 | 0 | 1598 | 289 | 48 | 25 | 0%     | 12.7   |
| WM | FIT 45-85, 2     | 12769 | 0 | 0 | 1670 | 292 | 48 | 26 | 0%     | 23.6   |
| WM | FIT 55-75, 1     | 12001 | 0 | 0 | 1594 | 245 | 48 | 24 | -15.1% | Dom.   |
| WM | FIT 55-80, 1     | 13468 | 0 | 0 | 1715 | 251 | 50 | 25 | -14.7% | Dom.   |
| WM | FIT 55-85, 1     | 14439 | 0 | 0 | 1789 | 252 | 50 | 25 | -15.0% | Dom.   |
| WM | FIT 50-75, 1     | 15221 | 0 | 0 | 1869 | 281 | 54 | 26 | -6.2%  | Dom.   |
| WM | FIT 50-80, 1     | 16675 | 0 | 0 | 1987 | 286 | 55 | 27 | -5.9%  | Dom.   |
| WM | FIT 50-85, 1     | 17640 | 0 | 0 | 2059 | 287 | 56 | 27 | -6.2%  | Dom.   |
| WM | FIT 45-75, 1     | 18598 | 0 | 0 | 2119 | 308 | 57 | 27 | -0.2%  | 28.1*  |
| WM | FIT 45-80, 1     | 20047 | 0 | 0 | 2235 | 313 | 59 | 28 | 0%     | 26.8   |
| WM | FIT 45-85, 1     | 21009 | 0 | 0 | 2307 | 315 | 59 | 28 | 0%     | 49.3   |
| WM | FIT-DNA 55-75, 5 | 3463  | 0 | 0 | 1264 | 212 | 39 | 21 | -19.1% | Dom.   |
| WM | FIT-DNA 55-80, 5 | 3813  | 0 | 0 | 1348 | 217 | 40 | 22 | -19.4% | Dom.   |
| WM | FIT-DNA 55-85, 5 | 4031  | 0 | 0 | 1398 | 218 | 39 | 22 | -20.0% | Dom.   |
| WM | FIT-DNA 50-75, 5 | 4267  | 0 | 0 | 1468 | 243 | 43 | 22 | -12.6% | Dom.   |
| WM | FIT-DNA 50-80, 5 | 4614  | 0 | 0 | 1550 | 248 | 44 | 23 | -13.0% | Dom.   |
| WM | FIT-DNA 50-85, 5 | 4830  | 0 | 0 | 1599 | 250 | 44 | 24 | -13.6% | Dom.   |
| WM | FIT-DNA 45-75, 5 | 5102  | 0 | 0 | 1652 | 268 | 46 | 23 | -8.1%  | Dom.   |
| WM | FIT-DNA 45-80, 5 | 5446  | 0 | 0 | 1733 | 272 | 47 | 24 | -7.5%  | Dom.   |
| WM | FIT-DNA 45-85, 5 | 5662  | 0 | 0 | 1781 | 274 | 47 | 25 | -7.6%  | Dom.   |
| WM | FIT-DNA 55-75, 3 | 4513  | 0 | 0 | 1520 | 233 | 45 | 22 | -17.6% | Dom.   |
| WM | FIT-DNA 55-80, 3 | 5176  | 0 | 0 | 1666 | 241 | 47 | 24 | -17.4% | Dom.   |
| WM | FIT-DNA 55-85, 3 | 5505  | 0 | 0 | 1733 | 243 | 47 | 24 | -17.6% | Dom.   |

|    |                  |       |      |   |      |     |    |    |        |        |
|----|------------------|-------|------|---|------|-----|----|----|--------|--------|
| WM | FIT-DNA 50-75, 3 | 5805  | 0    | 0 | 1820 | 270 | 50 | 25 | -9.3%  | Dom.   |
| WM | FIT-DNA 50-80, 3 | 6297  | 0    | 0 | 1927 | 275 | 52 | 26 | -8.8%  | Dom.   |
| WM | FIT-DNA 50-85, 3 | 6648  | 0    | 0 | 1995 | 277 | 52 | 26 | -9.0%  | Dom.   |
| WM | FIT-DNA 45-75, 3 | 6966  | 0    | 0 | 2056 | 296 | 53 | 26 | -3.6%  | Dom.   |
| WM | FIT-DNA 45-80, 3 | 7489  | 0    | 0 | 2163 | 301 | 55 | 27 | -3.0%  | Dom.   |
| WM | FIT-DNA 45-85, 3 | 7885  | 0    | 0 | 2243 | 303 | 55 | 27 | -3.3%  | Dom.   |
| WM | FIT-DNA 55-75, 1 | 8456  | 0    | 0 | 2320 | 256 | 55 | 25 | -18.7% | Dom.   |
| WM | FIT-DNA 55-80, 1 | 9354  | 0    | 0 | 2469 | 259 | 57 | 26 | -18.0% | Dom.   |
| WM | FIT-DNA 55-85, 1 | 9954  | 0    | 0 | 2563 | 260 | 57 | 26 | -17.9% | Dom.   |
| WM | FIT-DNA 50-75, 1 | 10613 | 0    | 0 | 2726 | 291 | 60 | 27 | -8.4%  | Dom.   |
| WM | FIT-DNA 50-80, 1 | 11528 | 0    | 0 | 2877 | 294 | 62 | 27 | -7.7%  | Dom.   |
| WM | FIT-DNA 50-85, 1 | 12121 | 0    | 0 | 2970 | 295 | 62 | 28 | -7.6%  | Dom.   |
| WM | FIT-DNA 45-75, 1 | 12911 | 0    | 0 | 3114 | 318 | 64 | 28 | -0.7%  | 233.9* |
| WM | FIT-DNA 45-80, 1 | 13816 | 0    | 0 | 3263 | 321 | 65 | 28 | 0.0%   | 144.7* |
| WM | FIT-DNA 45-85, 1 | 14409 | 0    | 0 | 3355 | 322 | 65 | 29 | 0%     | 141.4  |
| WM | HSgFOBT 55-75, 3 | 4876  | 0    | 0 | 1130 | 194 | 33 | 19 | -19.6% | Dom.   |
| WM | HSgFOBT 55-80, 3 | 5658  | 0    | 0 | 1256 | 206 | 35 | 21 | -21.2% | Dom.   |
| WM | HSgFOBT 55-85, 3 | 6070  | 0    | 0 | 1320 | 208 | 35 | 21 | -21.8% | Dom.   |
| WM | HSgFOBT 50-75, 3 | 6291  | 0    | 0 | 1376 | 231 | 38 | 21 | -14.9% | Dom.   |
| WM | HSgFOBT 50-80, 3 | 6898  | 0    | 0 | 1474 | 239 | 40 | 22 | -14.5% | Dom.   |
| WM | HSgFOBT 50-85, 3 | 7275  | 0    | 0 | 1527 | 241 | 40 | 23 | -15.0% | Dom.   |
| WM | HSgFOBT 45-75, 3 | 7576  | 0    | 0 | 1578 | 256 | 42 | 22 | -10.9% | Dom.   |
| WM | HSgFOBT 45-80, 3 | 8129  | 0    | 0 | 1660 | 263 | 43 | 23 | -9.9%  | Dom.   |
| WM | HSgFOBT 45-85, 3 | 8621  | 0    | 0 | 1733 | 266 | 43 | 24 | -9.6%  | Dom.   |
| WM | HSgFOBT 55-75, 2 | 6673  | 0    | 0 | 1455 | 222 | 40 | 22 | -20.0% | Dom.   |
| WM | HSgFOBT 55-80, 2 | 7325  | 0    | 0 | 1551 | 228 | 42 | 23 | -20.2% | Dom.   |
| WM | HSgFOBT 55-85, 2 | 7977  | 0    | 0 | 1640 | 231 | 42 | 23 | -20.7% | Dom.   |
| WM | HSgFOBT 50-75, 2 | 8158  | 0    | 0 | 1700 | 255 | 45 | 23 | -13.2% | Dom.   |
| WM | HSgFOBT 50-80, 2 | 9122  | 0    | 0 | 1838 | 263 | 47 | 25 | -11.9% | Dom.   |
| WM | HSgFOBT 50-85, 2 | 9552  | 0    | 0 | 1896 | 265 | 47 | 25 | -12.0% | Dom.   |
| WM | HSgFOBT 45-75, 2 | 10082 | 0    | 0 | 1979 | 283 | 49 | 25 | -6.7%  | Dom.   |
| WM | HSgFOBT 45-80, 2 | 10721 | 0    | 0 | 2071 | 289 | 50 | 26 | -6.0%  | Dom.   |
| WM | HSgFOBT 45-85, 2 | 11363 | 0    | 0 | 2157 | 291 | 51 | 26 | -6.1%  | Dom.   |
| WM | HSgFOBT 55-75, 1 | 9971  | 0    | 0 | 1978 | 245 | 50 | 24 | -19.3% | Dom.   |
| WM | HSgFOBT 55-80, 1 | 11100 | 0    | 0 | 2120 | 250 | 51 | 25 | -19.2% | Dom.   |
| WM | HSgFOBT 55-85, 1 | 11847 | 0    | 0 | 2208 | 251 | 51 | 25 | -19.6% | Dom.   |
| WM | HSgFOBT 50-75, 1 | 12485 | 0    | 0 | 2345 | 281 | 55 | 26 | -10.8% | Dom.   |
| WM | HSgFOBT 50-80, 1 | 13612 | 0    | 0 | 2485 | 285 | 56 | 27 | -9.7%  | Dom.   |
| WM | HSgFOBT 50-85, 1 | 14354 | 0    | 0 | 2571 | 286 | 57 | 27 | -9.5%  | Dom.   |
| WM | HSgFOBT 45-75, 1 | 15127 | 0    | 0 | 2689 | 308 | 58 | 27 | -2.9%  | Dom.   |
| WM | HSgFOBT 45-80, 1 | 16247 | 0    | 0 | 2828 | 313 | 60 | 28 | -1.8%  | Dom.   |
| WM | HSgFOBT 45-85, 1 | 16986 | 0    | 0 | 2914 | 314 | 60 | 28 | -1.6%  | Dom.   |
| WM | SIG 55-75, 10    | 0     | 2202 | 0 | 1382 | 198 | 45 | 20 | 0%     | 6.6    |
| WM | SIG 55-80, 10    | 0     | 2202 | 0 | 1382 | 198 | 45 | 20 | 0%     | 6.6    |
| WM | SIG 55-85, 10    | 0     | 2444 | 0 | 1464 | 200 | 45 | 20 | -9.9%  | Dom.   |
| WM | SIG 50-75, 10    | 0     | 2423 | 0 | 1468 | 222 | 47 | 21 | 0%     | 3.6    |

|    |               |   |      |      |      |     |    |    |        |       |
|----|---------------|---|------|------|------|-----|----|----|--------|-------|
| WM | SIG 50-80, 10 | 0 | 2805 | 0    | 1608 | 228 | 49 | 22 | -4.1%  | Dom.  |
| WM | SIG 50-85, 10 | 0 | 2805 | 0    | 1608 | 228 | 49 | 22 | -4.1%  | Dom.  |
| WM | SIG 45-75, 10 | 0 | 3112 | 0    | 1711 | 248 | 51 | 22 | 0%     | 9.3   |
| WM | SIG 45-80, 10 | 0 | 3112 | 0    | 1711 | 248 | 51 | 22 | 0%     | 9.3   |
| WM | SIG 45-85, 10 | 0 | 3352 | 0    | 1791 | 250 | 52 | 23 | -1.3%  | 58.5* |
| WM | SIG 55-75, 5  | 0 | 3211 | 0    | 1703 | 218 | 50 | 22 | -12.1% | Dom.  |
| WM | SIG 55-80, 5  | 0 | 3516 | 0    | 1791 | 220 | 51 | 22 | -13.1% | Dom.  |
| WM | SIG 55-85, 5  | 0 | 3705 | 0    | 1841 | 220 | 51 | 23 | -13.9% | Dom.  |
| WM | SIG 50-75, 5  | 0 | 3968 | 0    | 1957 | 250 | 55 | 24 | -4.7%  | Dom.  |
| WM | SIG 50-80, 5  | 0 | 4270 | 0    | 2044 | 252 | 56 | 24 | -5.7%  | Dom.  |
| WM | SIG 50-85, 5  | 0 | 4458 | 0    | 2093 | 253 | 56 | 24 | -6.4%  | Dom.  |
| WM | SIG 45-75, 5  | 0 | 4760 | 0    | 2185 | 275 | 58 | 25 | 0%     | 17.7  |
| WM | SIG 45-80, 5  | 0 | 5061 | 0    | 2271 | 277 | 59 | 25 | 0%     | 42.4  |
| WM | SIG 45-85, 5  | 0 | 5248 | 0    | 2320 | 278 | 59 | 25 | 0%     | 99.2  |
| WM | CTC 55-75, 10 | 0 | 0    | 2170 | 1533 | 232 | 51 | 23 | 0%     | 6.3   |
| WM | CTC 55-80, 10 | 0 | 0    | 2170 | 1533 | 232 | 51 | 23 | 0%     | 6.3   |
| WM | CTC 55-85, 10 | 0 | 0    | 2397 | 1626 | 234 | 52 | 24 | -10.4% | Dom.  |
| WM | CTC 50-75, 10 | 0 | 0    | 2397 | 1605 | 259 | 53 | 24 | 0%     | 2.7   |
| WM | CTC 50-80, 10 | 0 | 0    | 2762 | 1763 | 265 | 56 | 25 | -4.3%  | Dom.  |
| WM | CTC 50-85, 10 | 0 | 0    | 2762 | 1763 | 265 | 56 | 25 | -4.3%  | Dom.  |
| WM | CTC 45-75, 10 | 0 | 0    | 3077 | 1854 | 287 | 58 | 26 | 0%     | 8.8   |
| WM | CTC 45-80, 10 | 0 | 0    | 3077 | 1854 | 287 | 58 | 26 | 0%     | 8.8   |
| WM | CTC 45-85, 10 | 0 | 0    | 3303 | 1946 | 288 | 58 | 26 | -1.2%  | 61.6* |
| WM | CTC 55-75, 5  | 0 | 0    | 3152 | 1840 | 250 | 56 | 25 | -12.4% | Dom.  |
| WM | CTC 55-80, 5  | 0 | 0    | 3441 | 1932 | 252 | 57 | 25 | -13.4% | Dom.  |
| WM | CTC 55-85, 5  | 0 | 0    | 3618 | 1984 | 253 | 57 | 25 | -14.1% | Dom.  |
| WM | CTC 50-75, 5  | 0 | 0    | 3913 | 2086 | 285 | 61 | 26 | -4.8%  | Dom.  |
| WM | CTC 50-80, 5  | 0 | 0    | 4201 | 2177 | 287 | 62 | 27 | -5.7%  | Dom.  |
| WM | CTC 50-85, 5  | 0 | 0    | 4377 | 2229 | 288 | 62 | 27 | -6.4%  | Dom.  |
| WM | CTC 45-75, 5  | 0 | 0    | 4713 | 2303 | 312 | 64 | 27 | 0%     | 18.2  |
| WM | CTC 45-80, 5  | 0 | 0    | 5001 | 2393 | 314 | 65 | 28 | 0%     | 43.9  |
| WM | CTC 45-85, 5  | 0 | 0    | 5177 | 2444 | 314 | 65 | 28 | 0%     | 103.5 |

#### SimCRC - Scenario 2: Increased CRC risk

|    |               |   |   |   |      |     |     |    |       |       |
|----|---------------|---|---|---|------|-----|-----|----|-------|-------|
| WM | No screening  | 0 | 0 | 0 | 162  | 0   | 0   | 0  | -     | -     |
| WM | COL 55-75, 15 | 0 | 0 | 0 | 3659 | 517 | 117 | 52 | 0%    | 6.8   |
| WM | COL 55-80, 15 | 0 | 0 | 0 | 3659 | 517 | 117 | 52 | 0%    | 6.8   |
| WM | COL 55-85, 15 | 0 | 0 | 0 | 3820 | 519 | 118 | 53 | -4.7% | Dom.  |
| WM | COL 50-75, 15 | 0 | 0 | 0 | 3964 | 566 | 120 | 53 | 0%    | 6.2   |
| WM | COL 50-80, 15 | 0 | 0 | 0 | 4301 | 577 | 124 | 55 | -2.0% | 31.9* |
| WM | COL 50-85, 15 | 0 | 0 | 0 | 4301 | 577 | 124 | 55 | -2.0% | 31.9* |
| WM | COL 45-75, 15 | 0 | 0 | 0 | 4744 | 617 | 129 | 57 | 0%    | 15.2  |
| WM | COL 45-80, 15 | 0 | 0 | 0 | 4744 | 617 | 129 | 57 | 0%    | 15.2  |
| WM | COL 45-85, 15 | 0 | 0 | 0 | 4744 | 617 | 129 | 57 | 0%    | 15.2  |
| WM | COL 55-75, 10 | 0 | 0 | 0 | 4197 | 539 | 124 | 55 | -7.2% | Dom.  |
| WM | COL 55-80, 10 | 0 | 0 | 0 | 4197 | 539 | 124 | 55 | -7.2% | Dom.  |
| WM | COL 55-85, 10 | 0 | 0 | 0 | 4310 | 540 | 124 | 55 | -8.2% | Dom.  |

|    |                  |       |   |   |      |     |     |    |        |        |
|----|------------------|-------|---|---|------|-----|-----|----|--------|--------|
| WM | COL 50-75, 10    | 0     | 0 | 0 | 4712 | 600 | 130 | 57 | -2.4%  | Dom.   |
| WM | COL 50-80, 10    | 0     | 0 | 0 | 4946 | 605 | 132 | 58 | -3.4%  | Dom.   |
| WM | COL 50-85, 10    | 0     | 0 | 0 | 4946 | 605 | 132 | 58 | -3.4%  | Dom.   |
| WM | COL 45-75, 10    | 0     | 0 | 0 | 5513 | 650 | 137 | 59 | 0%     | 23.5   |
| WM | COL 45-80, 10    | 0     | 0 | 0 | 5513 | 650 | 137 | 59 | 0%     | 23.5   |
| WM | COL 45-85, 10    | 0     | 0 | 0 | 5627 | 651 | 137 | 59 | -0.1%  | 148.3* |
| WM | COL 55-75, 5     | 0     | 0 | 0 | 5143 | 554 | 128 | 56 | -12.6% | Dom.   |
| WM | COL 55-80, 5     | 0     | 0 | 0 | 5294 | 555 | 129 | 56 | -13.3% | Dom.   |
| WM | COL 55-85, 5     | 0     | 0 | 0 | 5371 | 556 | 129 | 56 | -13.7% | Dom.   |
| WM | COL 50-75, 5     | 0     | 0 | 0 | 6186 | 623 | 137 | 59 | -5.5%  | Dom.   |
| WM | COL 50-80, 5     | 0     | 0 | 0 | 6337 | 624 | 138 | 59 | -5.6%  | Dom.   |
| WM | COL 50-85, 5     | 0     | 0 | 0 | 6414 | 624 | 138 | 59 | -5.7%  | Dom.   |
| WM | COL 45-75, 5     | 0     | 0 | 0 | 7244 | 672 | 143 | 61 | 0%     | 79.1   |
| WM | COL 45-80, 5     | 0     | 0 | 0 | 7395 | 673 | 144 | 61 | 0%     | 152.6  |
| WM | COL 45-85, 5     | 0     | 0 | 0 | 7472 | 673 | 144 | 61 | 0%     | 427.6  |
| WM | FIT 55-75, 3     | 4854  | 0 | 0 | 1363 | 409 | 69  | 39 | 0%     | 2.9    |
| WM | FIT 55-80, 3     | 5553  | 0 | 0 | 1508 | 435 | 74  | 44 | -3.4%  | Dom.   |
| WM | FIT 55-85, 3     | 5920  | 0 | 0 | 1579 | 442 | 74  | 46 | -6.1%  | Dom.   |
| WM | FIT 50-75, 3     | 6326  | 0 | 0 | 1597 | 475 | 78  | 44 | 0%     | 3.5    |
| WM | FIT 50-80, 3     | 6911  | 0 | 0 | 1717 | 495 | 82  | 47 | -2.1%  | Dom.   |
| WM | FIT 50-85, 3     | 7171  | 0 | 0 | 1764 | 499 | 82  | 48 | -3.5%  | Dom.   |
| WM | FIT 45-75, 3     | 7768  | 0 | 0 | 1784 | 522 | 84  | 46 | 0%     | 4.0    |
| WM | FIT 45-80, 3     | 8180  | 0 | 0 | 1862 | 536 | 86  | 49 | 0%     | 5.7    |
| WM | FIT 45-85, 3     | 8607  | 0 | 0 | 1942 | 544 | 87  | 50 | -0.4%  | 10.2*  |
| WM | FIT 55-75, 2     | 6779  | 0 | 0 | 1708 | 465 | 84  | 46 | -7.7%  | Dom.   |
| WM | FIT 55-80, 2     | 7355  | 0 | 0 | 1810 | 478 | 87  | 48 | -9.3%  | Dom.   |
| WM | FIT 55-85, 2     | 7886  | 0 | 0 | 1895 | 484 | 88  | 50 | -10.4% | Dom.   |
| WM | FIT 50-75, 2     | 8440  | 0 | 0 | 1928 | 523 | 92  | 48 | -4.0%  | Dom.   |
| WM | FIT 50-80, 2     | 9295  | 0 | 0 | 2075 | 542 | 96  | 52 | -3.7%  | Dom.   |
| WM | FIT 50-85, 2     | 9644  | 0 | 0 | 2130 | 545 | 97  | 52 | -4.3%  | Dom.   |
| WM | FIT 45-75, 2     | 10548 | 0 | 0 | 2172 | 575 | 99  | 51 | 0.0%   | 7.9*   |
| WM | FIT 45-80, 2     | 11113 | 0 | 0 | 2270 | 588 | 101 | 53 | 0%     | 7.8    |
| WM | FIT 45-85, 2     | 11637 | 0 | 0 | 2352 | 593 | 102 | 55 | 0%     | 14.6   |
| WM | FIT 55-75, 1     | 10764 | 0 | 0 | 2237 | 510 | 102 | 50 | -12.6% | Dom.   |
| WM | FIT 55-80, 1     | 11803 | 0 | 0 | 2372 | 521 | 106 | 53 | -12.4% | Dom.   |
| WM | FIT 55-85, 1     | 12420 | 0 | 0 | 2443 | 524 | 107 | 53 | -12.6% | Dom.   |
| WM | FIT 50-75, 1     | 13806 | 0 | 0 | 2573 | 576 | 112 | 54 | -5.2%  | Dom.   |
| WM | FIT 50-80, 1     | 14834 | 0 | 0 | 2704 | 586 | 115 | 56 | -4.8%  | Dom.   |
| WM | FIT 50-85, 1     | 15447 | 0 | 0 | 2775 | 589 | 116 | 56 | -5.1%  | Dom.   |
| WM | FIT 45-75, 1     | 17055 | 0 | 0 | 2867 | 625 | 118 | 56 | -0.3%  | 16.3*  |
| WM | FIT 45-80, 1     | 18077 | 0 | 0 | 2997 | 635 | 121 | 58 | 0%     | 15.4   |
| WM | FIT 45-85, 1     | 18687 | 0 | 0 | 3067 | 638 | 122 | 58 | 0%     | 26.9   |
| WM | FIT-DNA 55-75, 5 | 3232  | 0 | 0 | 1799 | 443 | 83  | 44 | -15.6% | Dom.   |
| WM | FIT-DNA 55-80, 5 | 3498  | 0 | 0 | 1898 | 453 | 85  | 46 | -16.2% | Dom.   |
| WM | FIT-DNA 55-85, 5 | 3650  | 0 | 0 | 1950 | 455 | 85  | 47 | -16.8% | Dom.   |
| WM | FIT-DNA 50-75, 5 | 4004  | 0 | 0 | 2053 | 502 | 91  | 47 | -10.4% | Dom.   |

|    |                  |       |   |   |      |     |     |    |        |        |
|----|------------------|-------|---|---|------|-----|-----|----|--------|--------|
| WM | FIT-DNA 50-80, 5 | 4267  | 0 | 0 | 2149 | 511 | 93  | 49 | -10.7% | Dom.   |
| WM | FIT-DNA 50-85, 5 | 4417  | 0 | 0 | 2201 | 514 | 93  | 50 | -11.3% | Dom.   |
| WM | FIT-DNA 45-75, 5 | 4814  | 0 | 0 | 2272 | 544 | 96  | 49 | -7.4%  | Dom.   |
| WM | FIT-DNA 45-80, 5 | 5076  | 0 | 0 | 2368 | 554 | 99  | 51 | -6.9%  | Dom.   |
| WM | FIT-DNA 45-85, 5 | 5225  | 0 | 0 | 2419 | 556 | 99  | 52 | -7.0%  | Dom.   |
| WM | FIT-DNA 55-75, 3 | 4161  | 0 | 0 | 2112 | 486 | 95  | 48 | -14.4% | Dom.   |
| WM | FIT-DNA 55-80, 3 | 4655  | 0 | 0 | 2278 | 502 | 100 | 51 | -14.7% | Dom.   |
| WM | FIT-DNA 55-85, 3 | 4876  | 0 | 0 | 2345 | 505 | 100 | 51 | -14.9% | Dom.   |
| WM | FIT-DNA 50-75, 3 | 5367  | 0 | 0 | 2475 | 554 | 105 | 52 | -7.9%  | Dom.   |
| WM | FIT-DNA 50-80, 3 | 5732  | 0 | 0 | 2595 | 565 | 108 | 54 | -7.3%  | Dom.   |
| WM | FIT-DNA 50-85, 3 | 5965  | 0 | 0 | 2662 | 568 | 109 | 54 | -7.4%  | Dom.   |
| WM | FIT-DNA 45-75, 3 | 6500  | 0 | 0 | 2753 | 599 | 111 | 53 | -3.3%  | Dom.   |
| WM | FIT-DNA 45-80, 3 | 6884  | 0 | 0 | 2873 | 611 | 114 | 55 | -2.7%  | Dom.   |
| WM | FIT-DNA 45-85, 3 | 7150  | 0 | 0 | 2953 | 614 | 115 | 56 | -2.9%  | Dom.   |
| WM | FIT-DNA 55-75, 1 | 7459  | 0 | 0 | 2977 | 530 | 115 | 53 | -16.3% | Dom.   |
| WM | FIT-DNA 55-80, 1 | 8054  | 0 | 0 | 3115 | 537 | 118 | 54 | -15.9% | Dom.   |
| WM | FIT-DNA 55-85, 1 | 8405  | 0 | 0 | 3188 | 538 | 118 | 55 | -15.8% | Dom.   |
| WM | FIT-DNA 50-75, 1 | 9487  | 0 | 0 | 3443 | 596 | 124 | 56 | -7.3%  | Dom.   |
| WM | FIT-DNA 50-80, 1 | 10092 | 0 | 0 | 3582 | 602 | 126 | 57 | -6.6%  | Dom.   |
| WM | FIT-DNA 50-85, 1 | 10440 | 0 | 0 | 3654 | 604 | 127 | 57 | -6.5%  | Dom.   |
| WM | FIT-DNA 45-75, 1 | 11686 | 0 | 0 | 3874 | 644 | 129 | 58 | -0.8%  | 141.4* |
| WM | FIT-DNA 45-80, 1 | 12284 | 0 | 0 | 4011 | 650 | 132 | 59 | -0.1%  | 78.7*  |
| WM | FIT-DNA 45-85, 1 | 12631 | 0 | 0 | 4082 | 651 | 133 | 59 | 0%     | 75.8   |
| WM | HSgFOBT 55-75, 3 | 4602  | 0 | 0 | 1590 | 408 | 71  | 40 | -13.9% | Dom.   |
| WM | HSgFOBT 55-80, 3 | 5231  | 0 | 0 | 1743 | 431 | 76  | 44 | -15.7% | Dom.   |
| WM | HSgFOBT 55-85, 3 | 5537  | 0 | 0 | 1812 | 437 | 76  | 45 | -17.1% | Dom.   |
| WM | HSgFOBT 50-75, 3 | 5943  | 0 | 0 | 1894 | 475 | 81  | 44 | -12.0% | Dom.   |
| WM | HSgFOBT 50-80, 3 | 6430  | 0 | 0 | 2012 | 492 | 84  | 47 | -11.4% | Dom.   |
| WM | HSgFOBT 50-85, 3 | 6700  | 0 | 0 | 2068 | 496 | 85  | 48 | -11.7% | Dom.   |
| WM | HSgFOBT 45-75, 3 | 7199  | 0 | 0 | 2136 | 521 | 87  | 46 | -8.8%  | Dom.   |
| WM | HSgFOBT 45-80, 3 | 7632  | 0 | 0 | 2232 | 534 | 90  | 49 | -8.3%  | Dom.   |
| WM | HSgFOBT 45-85, 3 | 7995  | 0 | 0 | 2312 | 541 | 91  | 50 | -8.4%  | Dom.   |
| WM | HSgFOBT 55-75, 2 | 6185  | 0 | 0 | 1986 | 463 | 86  | 46 | -16.0% | Dom.   |
| WM | HSgFOBT 55-80, 2 | 6683  | 0 | 0 | 2093 | 475 | 89  | 48 | -15.9% | Dom.   |
| WM | HSgFOBT 55-85, 2 | 7136  | 0 | 0 | 2182 | 481 | 90  | 49 | -16.6% | Dom.   |
| WM | HSgFOBT 50-75, 2 | 7629  | 0 | 0 | 2283 | 523 | 95  | 48 | -11.2% | Dom.   |
| WM | HSgFOBT 50-80, 2 | 8363  | 0 | 0 | 2438 | 540 | 99  | 52 | -9.9%  | Dom.   |
| WM | HSgFOBT 50-85, 2 | 8660  | 0 | 0 | 2495 | 543 | 99  | 52 | -9.9%  | Dom.   |
| WM | HSgFOBT 45-75, 2 | 9457  | 0 | 0 | 2609 | 575 | 102 | 51 | -5.7%  | Dom.   |
| WM | HSgFOBT 45-80, 2 | 9942  | 0 | 0 | 2711 | 587 | 105 | 53 | -4.9%  | Dom.   |
| WM | HSgFOBT 45-85, 2 | 10387 | 0 | 0 | 2797 | 592 | 105 | 55 | -4.9%  | Dom.   |
| WM | HSgFOBT 55-75, 1 | 9034  | 0 | 0 | 2581 | 509 | 104 | 51 | -16.3% | Dom.   |
| WM | HSgFOBT 55-80, 1 | 9834  | 0 | 0 | 2722 | 519 | 107 | 53 | -16.0% | Dom.   |
| WM | HSgFOBT 55-85, 1 | 10306 | 0 | 0 | 2796 | 521 | 108 | 53 | -16.3% | Dom.   |
| WM | HSgFOBT 50-75, 1 | 11408 | 0 | 0 | 3008 | 575 | 114 | 54 | -9.5%  | Dom.   |
| WM | HSgFOBT 50-80, 1 | 12203 | 0 | 0 | 3146 | 584 | 117 | 56 | -8.5%  | Dom.   |

|    |                  |       |      |      |      |     |     |    |        |       |
|----|------------------|-------|------|------|------|-----|-----|----|--------|-------|
| WM | HSgFOBT 50-85, 1 | 12672 | 0    | 0    | 3219 | 587 | 117 | 56 | -8.3%  | Dom.  |
| WM | HSgFOBT 45-75, 1 | 13946 | 0    | 0    | 3397 | 624 | 120 | 56 | -2.8%  | Dom.  |
| WM | HSgFOBT 45-80, 1 | 14735 | 0    | 0    | 3533 | 633 | 123 | 58 | -1.7%  | Dom.  |
| WM | HSgFOBT 45-85, 1 | 15201 | 0    | 0    | 3606 | 636 | 123 | 58 | -1.5%  | Dom.  |
| WM | SIG 55-75, 10    | 0     | 2028 | 0    | 2134 | 459 | 102 | 47 | 0%     | 4.3   |
| WM | SIG 55-80, 10    | 0     | 2028 | 0    | 2134 | 459 | 102 | 47 | 0%     | 4.3   |
| WM | SIG 55-85, 10    | 0     | 2189 | 0    | 2222 | 462 | 103 | 48 | -7.1%  | Dom.  |
| WM | SIG 50-75, 10    | 0     | 2281 | 0    | 2250 | 504 | 106 | 47 | 0%     | 2.6   |
| WM | SIG 50-80, 10    | 0     | 2562 | 0    | 2424 | 516 | 110 | 50 | -3.1%  | Dom.  |
| WM | SIG 50-85, 10    | 0     | 2562 | 0    | 2424 | 516 | 110 | 50 | -3.1%  | Dom.  |
| WM | SIG 45-75, 10    | 0     | 2903 | 0    | 2557 | 554 | 114 | 51 | 0%     | 6.2   |
| WM | SIG 45-80, 10    | 0     | 2903 | 0    | 2557 | 554 | 114 | 51 | 0%     | 6.2   |
| WM | SIG 45-85, 10    | 0     | 3063 | 0    | 2644 | 557 | 115 | 52 | -0.8%  | 33.7* |
| WM | SIG 55-75, 5     | 0     | 2850 | 0    | 2500 | 493 | 112 | 50 | -9.5%  | Dom.  |
| WM | SIG 55-80, 5     | 0     | 3052 | 0    | 2592 | 497 | 114 | 51 | -10.8% | Dom.  |
| WM | SIG 55-85, 5     | 0     | 3165 | 0    | 2637 | 498 | 114 | 51 | -11.3% | Dom.  |
| WM | SIG 50-75, 5     | 0     | 3561 | 0    | 2817 | 555 | 120 | 53 | -3.7%  | Dom.  |
| WM | SIG 50-80, 5     | 0     | 3761 | 0    | 2908 | 558 | 122 | 54 | -4.3%  | Dom.  |
| WM | SIG 50-85, 5     | 0     | 3873 | 0    | 2952 | 559 | 122 | 54 | -4.8%  | Dom.  |
| WM | SIG 45-75, 5     | 0     | 4319 | 0    | 3091 | 599 | 125 | 55 | 0%     | 11.9  |
| WM | SIG 45-80, 5     | 0     | 4518 | 0    | 3181 | 603 | 127 | 56 | 0%     | 23.3  |
| WM | SIG 45-85, 5     | 0     | 4630 | 0    | 3225 | 604 | 128 | 56 | 0%     | 55.9  |
| WM | CTC 55-75, 10    | 0     | 0    | 2006 | 2239 | 485 | 107 | 49 | 0%     | 4.3   |
| WM | CTC 55-80, 10    | 0     | 0    | 2006 | 2239 | 485 | 107 | 49 | 0%     | 4.3   |
| WM | CTC 55-85, 10    | 0     | 0    | 2158 | 2338 | 488 | 108 | 50 | -8.3%  | Dom.  |
| WM | CTC 50-75, 10    | 0     | 0    | 2264 | 2335 | 532 | 110 | 50 | 0%     | 2.1   |
| WM | CTC 50-80, 10    | 0     | 0    | 2535 | 2528 | 544 | 115 | 53 | -3.5%  | Dom.  |
| WM | CTC 50-85, 10    | 0     | 0    | 2535 | 2528 | 544 | 115 | 53 | -3.5%  | Dom.  |
| WM | CTC 45-75, 10    | 0     | 0    | 2882 | 2648 | 583 | 118 | 54 | 0%     | 6.1   |
| WM | CTC 45-80, 10    | 0     | 0    | 2882 | 2648 | 583 | 118 | 54 | 0%     | 6.1   |
| WM | CTC 45-85, 10    | 0     | 0    | 3033 | 2746 | 586 | 119 | 54 | -1.1%  | 37.0* |
| WM | CTC 55-75, 5     | 0     | 0    | 2813 | 2596 | 521 | 117 | 52 | -9.3%  | Dom.  |
| WM | CTC 55-80, 5     | 0     | 0    | 3005 | 2694 | 525 | 119 | 53 | -10.6% | Dom.  |
| WM | CTC 55-85, 5     | 0     | 0    | 3109 | 2740 | 526 | 119 | 54 | -11.2% | Dom.  |
| WM | CTC 50-75, 5     | 0     | 0    | 3530 | 2905 | 585 | 125 | 55 | -3.7%  | Dom.  |
| WM | CTC 50-80, 5     | 0     | 0    | 3720 | 3001 | 589 | 127 | 56 | -4.4%  | Dom.  |
| WM | CTC 50-85, 5     | 0     | 0    | 3824 | 3048 | 590 | 127 | 57 | -5.0%  | Dom.  |
| WM | CTC 45-75, 5     | 0     | 0    | 4299 | 3164 | 632 | 130 | 57 | 0%     | 10.6  |
| WM | CTC 45-80, 5     | 0     | 0    | 4490 | 3260 | 636 | 132 | 58 | 0%     | 24.4  |
| WM | CTC 45-85, 5     | 0     | 0    | 4593 | 3307 | 637 | 132 | 58 | 0%     | 60.8  |

Abbreviations: COL = colonoscopy; CRC = colorectal cancer; CTC = computed tomographic colonography; Dom. = dominated strategy; ER = efficiency ratio; FIT = fecal immunochemical test; FIT-DNA = multitarget stool DNA test; HSgFOBT = high-sensitivity guaiac-based fecal occult blood test; LYG = life-years gained; SIG = flexible sigmoidoscopy; WM = white male.

<sup>a</sup> Both models evaluated two scenarios for CRC risk: one in which age-specific risks were assumed to have remained stable since the early screening period in the U.S. (1975-1979 for SimCRC; 1990-1994 for MISCAN), and one in which risks were assumed to have increased proportional to observed trends among adults under age 40 years. Strategies for each model and scenario are ordered successively by screening modality, interval (↓), end age (↑), and start age (↓).

<sup>b</sup> Total number of colonoscopies performed per 1000 40-year-olds, including diagnostic colonoscopies and potential surveillance colonoscopies after adenoma removal. The number of screening-related complications ranged from 4.9 to 33.5 per 1000 40-year-olds across models, scenarios, and strategies.

<sup>c</sup> Including deaths from complications of screening.

<sup>d</sup> The difference in LYG compared to (combinations of) adjacent strategies on the efficient frontier. Near-efficient strategies have a loss in LYG of less than 2% before rounding. For the least intensive screening strategy evaluated within each class of screening modality, the difference was zero by definition.

<sup>e</sup> Efficiency ratio = incremental number of colonoscopies/LYG with respect to the next less effective strategy on the efficient frontier, a burden-to-benefit ratio. Only calculated for efficient and near-efficient strategies (marked with an asterisk\*), i.e. strategies within 2% from the efficient frontier among all evaluated strategies within a class of screening modalities (colonoscopy, stool-based, sigmoidoscopy, and CTC).



**Supplementary Table 6. Lifetime Number of Colonoscopies and LYG for All Evaluated Screening Strategies under Two Scenarios for CRC Risk, by Model, in Black Males <sup>a</sup>**

| Sub-group                                   | Modality, and age to begin-end screening, interval, y | Outcomes per 1000 40-year-olds |      |      |                   |     |                   |                                 | Relative distance from efficient frontier <sup>d</sup> | ER <sup>e</sup> |
|---------------------------------------------|-------------------------------------------------------|--------------------------------|------|------|-------------------|-----|-------------------|---------------------------------|--------------------------------------------------------|-----------------|
|                                             |                                                       | Stool tests                    | SIGs | CTCs | COLs <sup>b</sup> | LYG | CRC cases averted | CRC deaths averted <sup>c</sup> |                                                        |                 |
| <b>MISCAN - Scenario 1: Stable CRC risk</b> |                                                       |                                |      |      |                   |     |                   |                                 |                                                        |                 |
| BM                                          | No screening                                          | 0                              | 0    | 0    | 62                | 0   | 0                 | 0                               | -                                                      | -               |
| BM                                          | COL 55-75, 15                                         | 0                              | 0    | 0    | 2812              | 210 | 33                | 21                              | 0%                                                     | 13.1            |
| BM                                          | COL 55-80, 15                                         | 0                              | 0    | 0    | 2812              | 210 | 33                | 21                              | 0%                                                     | 13.1            |
| BM                                          | COL 55-85, 15                                         | 0                              | 0    | 0    | 2975              | 211 | 33                | 21                              | -4.4%                                                  | Dom.            |
| BM                                          | COL 50-75, 15                                         | 0                              | 0    | 0    | 3160              | 233 | 35                | 22                              | 0%                                                     | 15.7            |
| BM                                          | COL 50-80, 15                                         | 0                              | 0    | 0    | 3438              | 235 | 36                | 22                              | -1.7%                                                  | 93.1*           |
| BM                                          | COL 50-85, 15                                         | 0                              | 0    | 0    | 3438              | 235 | 36                | 22                              | -1.7%                                                  | 93.1*           |
| BM                                          | COL 45-75, 15                                         | 0                              | 0    | 0    | 3839              | 249 | 37                | 23                              | -0.3%                                                  | 190.8*          |
| BM                                          | COL 45-80, 15                                         | 0                              | 0    | 0    | 3839              | 249 | 37                | 23                              | -0.3%                                                  | 190.8*          |
| BM                                          | COL 45-85, 15                                         | 0                              | 0    | 0    | 3839              | 249 | 37                | 23                              | -0.3%                                                  | 190.8*          |
| BM                                          | COL 55-75, 10                                         | 0                              | 0    | 0    | 3306              | 220 | 35                | 22                              | -6.7%                                                  | Dom.            |
| BM                                          | COL 55-80, 10                                         | 0                              | 0    | 0    | 3306              | 220 | 35                | 22                              | -6.7%                                                  | Dom.            |
| BM                                          | COL 55-85, 10                                         | 0                              | 0    | 0    | 3454              | 221 | 35                | 22                              | -8.1%                                                  | Dom.            |
| BM                                          | COL 50-75, 10                                         | 0                              | 0    | 0    | 3791              | 248 | 38                | 23                              | 0%                                                     | 40.0            |
| BM                                          | COL 50-80, 10                                         | 0                              | 0    | 0    | 4040              | 250 | 38                | 23                              | -1.7%                                                  | 157.8*          |
| BM                                          | COL 50-85, 10                                         | 0                              | 0    | 0    | 4040              | 250 | 38                | 23                              | -1.7%                                                  | 157.8*          |
| BM                                          | COL 45-75, 10                                         | 0                              | 0    | 0    | 4561              | 266 | 40                | 24                              | 0%                                                     | 42.9            |
| BM                                          | COL 45-80, 10                                         | 0                              | 0    | 0    | 4561              | 266 | 40                | 24                              | 0%                                                     | 42.9            |
| BM                                          | COL 45-85, 10                                         | 0                              | 0    | 0    | 4710              | 267 | 40                | 24                              | -0.4%                                                  | 526.0*          |
| BM                                          | COL 55-75, 5                                          | 0                              | 0    | 0    | 4335              | 231 | 37                | 23                              | -11.7%                                                 | Dom.            |
| BM                                          | COL 55-80, 5                                          | 0                              | 0    | 0    | 4559              | 231 | 38                | 23                              | -13.2%                                                 | Dom.            |
| BM                                          | COL 55-85, 5                                          | 0                              | 0    | 0    | 4697              | 231 | 38                | 23                              | -13.6%                                                 | Dom.            |
| BM                                          | COL 50-75, 5                                          | 0                              | 0    | 0    | 5342              | 263 | 41                | 24                              | -4.0%                                                  | Dom.            |
| BM                                          | COL 50-80, 5                                          | 0                              | 0    | 0    | 5566              | 263 | 41                | 24                              | -4.5%                                                  | Dom.            |
| BM                                          | COL 50-85, 5                                          | 0                              | 0    | 0    | 5704              | 263 | 41                | 24                              | -5.0%                                                  | Dom.            |
| BM                                          | COL 45-75, 5                                          | 0                              | 0    | 0    | 6375              | 284 | 43                | 25                              | 0%                                                     | 104.0           |
| BM                                          | COL 45-80, 5                                          | 0                              | 0    | 0    | 6599              | 284 | 43                | 25                              | 0%                                                     | 476.0           |
| BM                                          | COL 45-85, 5                                          | 0                              | 0    | 0    | 6737              | 284 | 43                | 25                              | 0%                                                     | 2032.9          |
| BM                                          | FIT 55-75, 3                                          | 4690                           | 0    | 0    | 792               | 152 | 14                | 15                              | 0%                                                     | 4.8             |
| BM                                          | FIT 55-80, 3                                          | 5382                           | 0    | 0    | 855               | 160 | 14                | 16                              | -0.7%                                                  | 7.5*            |
| BM                                          | FIT 55-85, 3                                          | 5801                           | 0    | 0    | 888               | 162 | 14                | 17                              | -2.3%                                                  | Dom.            |
| BM                                          | FIT 50-75, 3                                          | 6157                           | 0    | 0    | 958               | 177 | 16                | 16                              | 0%                                                     | 6.6             |
| BM                                          | FIT 50-80, 3                                          | 6795                           | 0    | 0    | 1014              | 183 | 17                | 18                              | 0%                                                     | 8.2             |
| BM                                          | FIT 50-85, 3                                          | 7013                           | 0    | 0    | 1030              | 185 | 16                | 18                              | -0.5%                                                  | 14.8*           |
| BM                                          | FIT 45-75, 3                                          | 7675                           | 0    | 0    | 1102              | 194 | 18                | 18                              | -0.1%                                                  | 8.5*            |
| BM                                          | FIT 45-80, 3                                          | 8003                           | 0    | 0    | 1129              | 197 | 18                | 18                              | 0%                                                     | 8.3             |
| BM                                          | FIT 45-85, 3                                          | 8459                           | 0    | 0    | 1164              | 200 | 18                | 19                              | -0.3%                                                  | 13.1*           |

|    |                  |       |   |   |      |     |    |    |        |       |
|----|------------------|-------|---|---|------|-----|----|----|--------|-------|
| BM | FIT 55-75, 2     | 6739  | 0 | 0 | 1009 | 176 | 18 | 17 | -3.7%  | Dom.  |
| BM | FIT 55-80, 2     | 7350  | 0 | 0 | 1055 | 181 | 19 | 18 | -4.1%  | Dom.  |
| BM | FIT 55-85, 2     | 7951  | 0 | 0 | 1096 | 183 | 19 | 19 | -5.3%  | Dom.  |
| BM | FIT 50-75, 2     | 8439  | 0 | 0 | 1190 | 201 | 21 | 19 | -1.0%  | 17.2* |
| BM | FIT 50-80, 2     | 9346  | 0 | 0 | 1256 | 208 | 21 | 20 | -0.7%  | 12.3* |
| BM | FIT 50-85, 2     | 9742  | 0 | 0 | 1282 | 209 | 21 | 20 | -1.2%  | 13.1* |
| BM | FIT 45-75, 2     | 10595 | 0 | 0 | 1375 | 220 | 23 | 20 | -0.1%  | 10.9* |
| BM | FIT 45-80, 2     | 11194 | 0 | 0 | 1418 | 224 | 23 | 20 | 0%     | 10.8  |
| BM | FIT 45-85, 2     | 11786 | 0 | 0 | 1457 | 226 | 23 | 21 | 0.0%   | 18.7* |
| BM | FIT 55-75, 1     | 11061 | 0 | 0 | 1384 | 202 | 25 | 20 | -8.5%  | Dom.  |
| BM | FIT 55-80, 1     | 12282 | 0 | 0 | 1456 | 207 | 26 | 21 | -8.7%  | Dom.  |
| BM | FIT 55-85, 1     | 13078 | 0 | 0 | 1498 | 208 | 26 | 21 | -9.1%  | Dom.  |
| BM | FIT 50-75, 1     | 14208 | 0 | 0 | 1662 | 232 | 28 | 21 | -2.5%  | Dom.  |
| BM | FIT 50-80, 1     | 15415 | 0 | 0 | 1731 | 236 | 29 | 22 | -2.3%  | Dom.  |
| BM | FIT 50-85, 1     | 16204 | 0 | 0 | 1772 | 237 | 29 | 22 | -2.7%  | Dom.  |
| BM | FIT 45-75, 1     | 17548 | 0 | 0 | 1912 | 251 | 30 | 22 | -0.2%  | 18.1* |
| BM | FIT 45-80, 1     | 18746 | 0 | 0 | 1980 | 256 | 31 | 23 | 0%     | 17.8  |
| BM | FIT 45-85, 1     | 19532 | 0 | 0 | 2021 | 257 | 31 | 23 | 0%     | 34.8  |
| BM | FIT-DNA 55-75, 5 | 3159  | 0 | 0 | 1117 | 168 | 19 | 17 | -14.1% | Dom.  |
| BM | FIT-DNA 55-80, 5 | 3432  | 0 | 0 | 1166 | 172 | 19 | 17 | -14.5% | Dom.  |
| BM | FIT-DNA 55-85, 5 | 3599  | 0 | 0 | 1194 | 172 | 18 | 18 | -15.2% | Dom.  |
| BM | FIT-DNA 50-75, 5 | 3944  | 0 | 0 | 1324 | 192 | 21 | 18 | -11.1% | Dom.  |
| BM | FIT-DNA 50-80, 5 | 4214  | 0 | 0 | 1372 | 195 | 21 | 19 | -11.4% | Dom.  |
| BM | FIT-DNA 50-85, 5 | 4380  | 0 | 0 | 1399 | 196 | 21 | 19 | -12.0% | Dom.  |
| BM | FIT-DNA 45-75, 5 | 4769  | 0 | 0 | 1507 | 207 | 22 | 19 | -9.5%  | Dom.  |
| BM | FIT-DNA 45-80, 5 | 5037  | 0 | 0 | 1554 | 211 | 22 | 20 | -9.1%  | Dom.  |
| BM | FIT-DNA 45-85, 5 | 5202  | 0 | 0 | 1580 | 211 | 22 | 20 | -9.4%  | Dom.  |
| BM | FIT-DNA 55-75, 3 | 4027  | 0 | 0 | 1334 | 187 | 23 | 18 | -13.7% | Dom.  |
| BM | FIT-DNA 55-80, 3 | 4567  | 0 | 0 | 1426 | 193 | 24 | 19 | -14.1% | Dom.  |
| BM | FIT-DNA 55-85, 3 | 4890  | 0 | 0 | 1474 | 195 | 24 | 20 | -14.4% | Dom.  |
| BM | FIT-DNA 50-75, 3 | 5231  | 0 | 0 | 1622 | 216 | 26 | 20 | -8.4%  | Dom.  |
| BM | FIT-DNA 50-80, 3 | 5725  | 0 | 0 | 1702 | 221 | 26 | 21 | -8.0%  | Dom.  |
| BM | FIT-DNA 50-85, 3 | 5893  | 0 | 0 | 1726 | 222 | 26 | 21 | -8.2%  | Dom.  |
| BM | FIT-DNA 45-75, 3 | 6482  | 0 | 0 | 1879 | 234 | 28 | 21 | -6.2%  | Dom.  |
| BM | FIT-DNA 45-80, 3 | 6736  | 0 | 0 | 1919 | 237 | 28 | 21 | -6.1%  | Dom.  |
| BM | FIT-DNA 45-85, 3 | 7088  | 0 | 0 | 1971 | 239 | 28 | 22 | -6.4%  | Dom.  |
| BM | FIT-DNA 55-75, 1 | 7811  | 0 | 0 | 2060 | 216 | 32 | 21 | -15.9% | Dom.  |
| BM | FIT-DNA 55-80, 1 | 8558  | 0 | 0 | 2158 | 219 | 32 | 22 | -15.2% | Dom.  |
| BM | FIT-DNA 55-85, 1 | 9055  | 0 | 0 | 2219 | 220 | 32 | 22 | -15.2% | Dom.  |
| BM | FIT-DNA 50-75, 1 | 9890  | 0 | 0 | 2483 | 247 | 35 | 23 | -6.0%  | Dom.  |
| BM | FIT-DNA 50-80, 1 | 10646 | 0 | 0 | 2581 | 249 | 35 | 23 | -5.4%  | Dom.  |
| BM | FIT-DNA 50-85, 1 | 11137 | 0 | 0 | 2641 | 250 | 35 | 23 | -5.4%  | Dom.  |
| BM | FIT-DNA 45-75, 1 | 12136 | 0 | 0 | 2879 | 266 | 36 | 23 | -0.5%  | 96.4* |
| BM | FIT-DNA 45-80, 1 | 12883 | 0 | 0 | 2975 | 268 | 37 | 24 | 0%     | 83.5  |
| BM | FIT-DNA 45-85, 1 | 13372 | 0 | 0 | 3034 | 269 | 37 | 24 | 0%     | 96.8  |
| BM | HSgFOBT 55-75, 3 | 4408  | 0 | 0 | 982  | 149 | 15 | 15 | -17.0% | Dom.  |

|    |                  |       |      |      |      |     |    |    |        |       |
|----|------------------|-------|------|------|------|-----|----|----|--------|-------|
| BM | HSgFOBT 55-80, 3 | 5034  | 0    | 0    | 1064 | 157 | 15 | 16 | -17.2% | Dom.  |
| BM | HSgFOBT 55-85, 3 | 5409  | 0    | 0    | 1108 | 159 | 14 | 17 | -18.4% | Dom.  |
| BM | HSgFOBT 50-75, 3 | 5731  | 0    | 0    | 1219 | 175 | 17 | 16 | -14.8% | Dom.  |
| BM | HSgFOBT 50-80, 3 | 6303  | 0    | 0    | 1291 | 181 | 17 | 18 | -14.5% | Dom.  |
| BM | HSgFOBT 50-85, 3 | 6498  | 0    | 0    | 1313 | 183 | 17 | 18 | -14.9% | Dom.  |
| BM | HSgFOBT 45-75, 3 | 7092  | 0    | 0    | 1435 | 193 | 19 | 18 | -14.3% | Dom.  |
| BM | HSgFOBT 45-80, 3 | 7385  | 0    | 0    | 1471 | 196 | 19 | 18 | -13.7% | Dom.  |
| BM | HSgFOBT 45-85, 3 | 7790  | 0    | 0    | 1517 | 198 | 19 | 19 | -13.6% | Dom.  |
| BM | HSgFOBT 55-75, 2 | 6149  | 0    | 0    | 1269 | 174 | 19 | 17 | -17.1% | Dom.  |
| BM | HSgFOBT 55-80, 2 | 6675  | 0    | 0    | 1331 | 179 | 19 | 18 | -17.3% | Dom.  |
| BM | HSgFOBT 55-85, 2 | 7188  | 0    | 0    | 1386 | 181 | 19 | 19 | -18.3% | Dom.  |
| BM | HSgFOBT 50-75, 2 | 7625  | 0    | 0    | 1532 | 200 | 22 | 19 | -13.2% | Dom.  |
| BM | HSgFOBT 50-80, 2 | 8400  | 0    | 0    | 1620 | 206 | 22 | 20 | -12.5% | Dom.  |
| BM | HSgFOBT 50-85, 2 | 8736  | 0    | 0    | 1655 | 207 | 22 | 20 | -12.7% | Dom.  |
| BM | HSgFOBT 45-75, 2 | 9484  | 0    | 0    | 1811 | 220 | 24 | 20 | -10.5% | Dom.  |
| BM | HSgFOBT 45-80, 2 | 9994  | 0    | 0    | 1868 | 224 | 24 | 21 | -10.1% | Dom.  |
| BM | HSgFOBT 45-85, 2 | 10494 | 0    | 0    | 1920 | 226 | 24 | 21 | -10.5% | Dom.  |
| BM | HSgFOBT 55-75, 1 | 9232  | 0    | 0    | 1745 | 201 | 26 | 20 | -16.9% | Dom.  |
| BM | HSgFOBT 55-80, 1 | 10152 | 0    | 0    | 1838 | 205 | 27 | 21 | -17.2% | Dom.  |
| BM | HSgFOBT 55-85, 1 | 10751 | 0    | 0    | 1894 | 206 | 27 | 21 | -17.8% | Dom.  |
| BM | HSgFOBT 50-75, 1 | 11660 | 0    | 0    | 2128 | 231 | 29 | 21 | -10.4% | Dom.  |
| BM | HSgFOBT 50-80, 1 | 12572 | 0    | 0    | 2218 | 235 | 30 | 22 | -9.4%  | Dom.  |
| BM | HSgFOBT 50-85, 1 | 13164 | 0    | 0    | 2273 | 236 | 30 | 22 | -9.3%  | Dom.  |
| BM | HSgFOBT 45-75, 1 | 14234 | 0    | 0    | 2485 | 251 | 31 | 22 | -4.4%  | Dom.  |
| BM | HSgFOBT 45-80, 1 | 15137 | 0    | 0    | 2574 | 254 | 32 | 23 | -3.5%  | Dom.  |
| BM | HSgFOBT 45-85, 1 | 15726 | 0    | 0    | 2628 | 255 | 32 | 23 | -3.4%  | Dom.  |
| BM | SIG 55-75, 10    | 0     | 1917 | 0    | 1540 | 175 | 28 | 18 | 0%     | 8.5   |
| BM | SIG 55-80, 10    | 0     | 1917 | 0    | 1540 | 175 | 28 | 18 | 0%     | 8.5   |
| BM | SIG 55-85, 10    | 0     | 2084 | 0    | 1577 | 175 | 28 | 18 | -2.0%  | Dom.  |
| BM | SIG 50-75, 10    | 0     | 2171 | 0    | 1716 | 194 | 29 | 18 | 0%     | 9.0   |
| BM | SIG 50-80, 10    | 0     | 2441 | 0    | 1789 | 197 | 30 | 19 | -0.9%  | 29.9* |
| BM | SIG 50-85, 10    | 0     | 2441 | 0    | 1789 | 197 | 30 | 19 | -0.9%  | 29.9* |
| BM | SIG 45-75, 10    | 0     | 2778 | 0    | 1946 | 207 | 31 | 19 | -0.1%  | 17.7* |
| BM | SIG 45-80, 10    | 0     | 2778 | 0    | 1946 | 207 | 31 | 19 | -0.1%  | 17.7* |
| BM | SIG 45-85, 10    | 0     | 2943 | 0    | 1982 | 208 | 31 | 19 | -0.9%  | 19.7* |
| BM | SIG 55-75, 5     | 0     | 2748 | 0    | 1782 | 190 | 30 | 19 | -4.2%  | Dom.  |
| BM | SIG 55-80, 5     | 0     | 2971 | 0    | 1828 | 191 | 31 | 19 | -5.0%  | Dom.  |
| BM | SIG 55-85, 5     | 0     | 3108 | 0    | 1852 | 191 | 31 | 19 | -5.5%  | Dom.  |
| BM | SIG 50-75, 5     | 0     | 3439 | 0    | 2084 | 215 | 33 | 20 | -0.3%  | 17.8* |
| BM | SIG 50-80, 5     | 0     | 3660 | 0    | 2129 | 216 | 33 | 21 | -1.0%  | 19.1* |
| BM | SIG 50-85, 5     | 0     | 3797 | 0    | 2153 | 216 | 33 | 21 | -1.6%  | 20.0* |
| BM | SIG 45-75, 5     | 0     | 4188 | 0    | 2343 | 230 | 34 | 21 | 0%     | 17.3  |
| BM | SIG 45-80, 5     | 0     | 4409 | 0    | 2388 | 231 | 35 | 21 | 0%     | 47.3  |
| BM | SIG 45-85, 5     | 0     | 4545 | 0    | 2412 | 231 | 35 | 21 | 0%     | 132.3 |
| BM | CTC 55-75, 10    | 0     | 0    | 2014 | 1155 | 170 | 23 | 17 | -0.3%  | 6.4   |
| BM | CTC 55-80, 10    | 0     | 0    | 2014 | 1155 | 170 | 23 | 17 | -0.3%  | 6.4   |

|    |               |   |   |      |      |     |    |    |       |       |
|----|---------------|---|---|------|------|-----|----|----|-------|-------|
| BM | CTC 55-85, 10 | 0 | 0 | 2200 | 1199 | 172 | 23 | 18 | -3.2% | Dom.  |
| BM | CTC 50-75, 10 | 0 | 0 | 2277 | 1258 | 187 | 24 | 17 | 0%    | 6.2   |
| BM | CTC 50-80, 10 | 0 | 0 | 2579 | 1336 | 193 | 25 | 19 | -0.8% | 12.7* |
| BM | CTC 50-85, 10 | 0 | 0 | 2579 | 1336 | 193 | 25 | 19 | -0.8% | 12.7* |
| BM | CTC 45-75, 10 | 0 | 0 | 2925 | 1434 | 201 | 26 | 19 | -1.8% | 12.9* |
| BM | CTC 45-80, 10 | 0 | 0 | 2925 | 1434 | 201 | 26 | 19 | -1.8% | 12.9* |
| BM | CTC 45-85, 10 | 0 | 0 | 3110 | 1477 | 202 | 26 | 19 | -3.1% | Dom.  |
| BM | CTC 55-75, 5  | 0 | 0 | 2976 | 1426 | 200 | 29 | 20 | -1.8% | 12.9* |
| BM | CTC 55-80, 5  | 0 | 0 | 3227 | 1477 | 203 | 29 | 20 | -2.9% | Dom.  |
| BM | CTC 55-85, 5  | 0 | 0 | 3381 | 1506 | 203 | 29 | 20 | -3.9% | Dom.  |
| BM | CTC 50-75, 5  | 0 | 0 | 3733 | 1659 | 227 | 31 | 21 | 0%    | 10.1  |
| BM | CTC 50-80, 5  | 0 | 0 | 3983 | 1709 | 229 | 32 | 22 | -0.7% | 19.9* |
| BM | CTC 50-85, 5  | 0 | 0 | 4135 | 1737 | 230 | 32 | 22 | -1.4% | 25.1* |
| BM | CTC 45-75, 5  | 0 | 0 | 4538 | 1860 | 243 | 32 | 22 | 0%    | 12.0  |
| BM | CTC 45-80, 5  | 0 | 0 | 4786 | 1910 | 246 | 33 | 22 | 0%    | 19.6  |
| BM | CTC 45-85, 5  | 0 | 0 | 4938 | 1937 | 246 | 33 | 22 | 0%    | 48.3  |

**MISCAN - Scenario 2: Increased CRC risk**

|    |               |      |   |   |      |     |    |    |        |        |
|----|---------------|------|---|---|------|-----|----|----|--------|--------|
| BM | No screening  | 0    | 0 | 0 | 88   | 0   | 0  | 0  | -      | -      |
| BM | COL 55-75, 15 | 0    | 0 | 0 | 3256 | 298 | 48 | 30 | 0%     | 10.6   |
| BM | COL 55-80, 15 | 0    | 0 | 0 | 3256 | 298 | 48 | 30 | 0%     | 10.6   |
| BM | COL 55-85, 15 | 0    | 0 | 0 | 3372 | 299 | 48 | 30 | -2.5%  | Dom.   |
| BM | COL 50-75, 15 | 0    | 0 | 0 | 3693 | 329 | 51 | 31 | 0%     | 13.9   |
| BM | COL 50-80, 15 | 0    | 0 | 0 | 3904 | 333 | 52 | 32 | -1.2%  | 55.6*  |
| BM | COL 50-85, 15 | 0    | 0 | 0 | 3904 | 333 | 52 | 32 | -1.2%  | 55.6*  |
| BM | COL 45-75, 15 | 0    | 0 | 0 | 4359 | 351 | 53 | 32 | -0.7%  | 95.4*  |
| BM | COL 45-80, 15 | 0    | 0 | 0 | 4359 | 351 | 53 | 32 | -0.7%  | 95.4*  |
| BM | COL 45-85, 15 | 0    | 0 | 0 | 4359 | 351 | 53 | 32 | -0.7%  | 95.4*  |
| BM | COL 55-75, 10 | 0    | 0 | 0 | 3664 | 311 | 51 | 31 | -5.0%  | Dom.   |
| BM | COL 55-80, 10 | 0    | 0 | 0 | 3664 | 311 | 51 | 31 | -5.0%  | Dom.   |
| BM | COL 55-85, 10 | 0    | 0 | 0 | 3762 | 311 | 51 | 31 | -6.3%  | Dom.   |
| BM | COL 50-75, 10 | 0    | 0 | 0 | 4243 | 350 | 55 | 33 | 0%     | 26.4   |
| BM | COL 50-80, 10 | 0    | 0 | 0 | 4419 | 352 | 55 | 33 | -1.1%  | 92.8*  |
| BM | COL 50-85, 10 | 0    | 0 | 0 | 4419 | 352 | 55 | 33 | -1.1%  | 92.8*  |
| BM | COL 45-75, 10 | 0    | 0 | 0 | 5010 | 375 | 57 | 34 | 0%     | 30.1   |
| BM | COL 45-80, 10 | 0    | 0 | 0 | 5010 | 375 | 57 | 34 | 0%     | 30.1   |
| BM | COL 45-85, 10 | 0    | 0 | 0 | 5108 | 376 | 57 | 34 | -0.3%  | 297.7* |
| BM | COL 55-75, 5  | 0    | 0 | 0 | 4459 | 324 | 54 | 32 | -9.4%  | Dom.   |
| BM | COL 55-80, 5  | 0    | 0 | 0 | 4604 | 324 | 54 | 32 | -10.4% | Dom.   |
| BM | COL 55-85, 5  | 0    | 0 | 0 | 4691 | 324 | 54 | 32 | -11.1% | Dom.   |
| BM | COL 50-75, 5  | 0    | 0 | 0 | 5467 | 369 | 58 | 35 | -3.5%  | Dom.   |
| BM | COL 50-80, 5  | 0    | 0 | 0 | 5612 | 370 | 59 | 35 | -4.0%  | Dom.   |
| BM | COL 50-85, 5  | 0    | 0 | 0 | 5698 | 370 | 59 | 35 | -4.3%  | Dom.   |
| BM | COL 45-75, 5  | 0    | 0 | 0 | 6499 | 399 | 61 | 36 | 0%     | 63.6   |
| BM | COL 45-80, 5  | 0    | 0 | 0 | 6645 | 399 | 61 | 36 | 0%     | 273.3  |
| BM | COL 45-85, 5  | 0    | 0 | 0 | 6731 | 400 | 61 | 36 | 0%     | 992.8  |
| BM | FIT 55-75, 3  | 4520 | 0 | 0 | 1040 | 209 | 21 | 21 | 0%     | 4.6    |

|    |                  |       |   |   |      |     |    |    |        |       |
|----|------------------|-------|---|---|------|-----|----|----|--------|-------|
| BM | FIT 55-80, 3     | 5130  | 0 | 0 | 1115 | 220 | 21 | 23 | -0.3%  | 6.5*  |
| BM | FIT 55-85, 3     | 5482  | 0 | 0 | 1152 | 223 | 21 | 24 | -1.6%  | 7.7*  |
| BM | FIT 50-75, 3     | 5928  | 0 | 0 | 1250 | 242 | 24 | 23 | 0%     | 6.2   |
| BM | FIT 50-80, 3     | 6482  | 0 | 0 | 1314 | 252 | 24 | 25 | 0%     | 6.9   |
| BM | FIT 50-85, 3     | 6665  | 0 | 0 | 1333 | 253 | 24 | 25 | -0.4%  | 11.9* |
| BM | FIT 45-75, 3     | 7395  | 0 | 0 | 1428 | 267 | 26 | 25 | -0.2%  | 7.6*  |
| BM | FIT 45-80, 3     | 7679  | 0 | 0 | 1459 | 272 | 26 | 25 | 0%     | 7.3   |
| BM | FIT 45-85, 3     | 8062  | 0 | 0 | 1498 | 275 | 26 | 26 | -0.3%  | 10.7* |
| BM | FIT 55-75, 2     | 6392  | 0 | 0 | 1307 | 243 | 27 | 24 | -3.1%  | Dom.  |
| BM | FIT 55-80, 2     | 6910  | 0 | 0 | 1359 | 249 | 27 | 26 | -3.3%  | Dom.  |
| BM | FIT 55-85, 2     | 7400  | 0 | 0 | 1401 | 252 | 27 | 26 | -4.4%  | Dom.  |
| BM | FIT 50-75, 2     | 8032  | 0 | 0 | 1534 | 278 | 30 | 26 | -0.7%  | 11.5* |
| BM | FIT 50-80, 2     | 8796  | 0 | 0 | 1607 | 287 | 31 | 28 | -0.4%  | 9.4*  |
| BM | FIT 50-85, 2     | 9117  | 0 | 0 | 1634 | 289 | 31 | 28 | -0.8%  | 10.0* |
| BM | FIT 45-75, 2     | 10094 | 0 | 0 | 1758 | 305 | 33 | 28 | -0.2%  | 8.9*  |
| BM | FIT 45-80, 2     | 10597 | 0 | 0 | 1806 | 311 | 33 | 29 | 0%     | 8.8   |
| BM | FIT 45-85, 2     | 11076 | 0 | 0 | 1846 | 314 | 33 | 29 | 0.0%   | 14.5* |
| BM | FIT 55-75, 1     | 10282 | 0 | 0 | 1748 | 281 | 37 | 28 | -7.6%  | Dom.  |
| BM | FIT 55-80, 1     | 11268 | 0 | 0 | 1820 | 287 | 38 | 29 | -7.9%  | Dom.  |
| BM | FIT 55-85, 1     | 11884 | 0 | 0 | 1860 | 289 | 38 | 30 | -8.2%  | Dom.  |
| BM | FIT 50-75, 1     | 13244 | 0 | 0 | 2085 | 323 | 41 | 30 | -2.3%  | Dom.  |
| BM | FIT 50-80, 1     | 14210 | 0 | 0 | 2153 | 329 | 42 | 31 | -2.0%  | Dom.  |
| BM | FIT 50-85, 1     | 14816 | 0 | 0 | 2191 | 331 | 42 | 32 | -2.3%  | Dom.  |
| BM | FIT 45-75, 1     | 16433 | 0 | 0 | 2380 | 351 | 44 | 31 | -0.3%  | 14.4* |
| BM | FIT 45-80, 1     | 17388 | 0 | 0 | 2446 | 357 | 45 | 32 | 0%     | 14.1  |
| BM | FIT 45-85, 1     | 17990 | 0 | 0 | 2483 | 358 | 45 | 33 | 0%     | 23.7  |
| BM | FIT-DNA 55-75, 5 | 3010  | 0 | 0 | 1420 | 233 | 27 | 24 | -12.6% | Dom.  |
| BM | FIT-DNA 55-80, 5 | 3239  | 0 | 0 | 1472 | 237 | 27 | 25 | -13.0% | Dom.  |
| BM | FIT-DNA 55-85, 5 | 3374  | 0 | 0 | 1499 | 239 | 27 | 25 | -13.6% | Dom.  |
| BM | FIT-DNA 50-75, 5 | 3759  | 0 | 0 | 1674 | 266 | 31 | 26 | -10.2% | Dom.  |
| BM | FIT-DNA 50-80, 5 | 3984  | 0 | 0 | 1724 | 270 | 31 | 27 | -10.4% | Dom.  |
| BM | FIT-DNA 50-85, 5 | 4116  | 0 | 0 | 1750 | 271 | 30 | 27 | -10.9% | Dom.  |
| BM | FIT-DNA 45-75, 5 | 4555  | 0 | 0 | 1892 | 287 | 33 | 27 | -9.4%  | Dom.  |
| BM | FIT-DNA 45-80, 5 | 4777  | 0 | 0 | 1941 | 292 | 33 | 28 | -9.0%  | Dom.  |
| BM | FIT-DNA 45-85, 5 | 4908  | 0 | 0 | 1967 | 293 | 33 | 28 | -9.2%  | Dom.  |
| BM | FIT-DNA 55-75, 3 | 3819  | 0 | 0 | 1682 | 260 | 33 | 26 | -12.3% | Dom.  |
| BM | FIT-DNA 55-80, 3 | 4266  | 0 | 0 | 1775 | 269 | 35 | 27 | -12.6% | Dom.  |
| BM | FIT-DNA 55-85, 3 | 4519  | 0 | 0 | 1819 | 271 | 35 | 28 | -13.3% | Dom.  |
| BM | FIT-DNA 50-75, 3 | 4947  | 0 | 0 | 2026 | 300 | 38 | 28 | -8.2%  | Dom.  |
| BM | FIT-DNA 50-80, 3 | 5348  | 0 | 0 | 2105 | 307 | 39 | 30 | -7.8%  | Dom.  |
| BM | FIT-DNA 50-85, 3 | 5479  | 0 | 0 | 2128 | 308 | 39 | 30 | -7.9%  | Dom.  |
| BM | FIT-DNA 45-75, 3 | 6134  | 0 | 0 | 2327 | 327 | 40 | 30 | -6.1%  | Dom.  |
| BM | FIT-DNA 45-80, 3 | 6340  | 0 | 0 | 2366 | 330 | 41 | 30 | -5.9%  | Dom.  |
| BM | FIT-DNA 45-85, 3 | 6615  | 0 | 0 | 2414 | 333 | 41 | 31 | -6.1%  | Dom.  |
| BM | FIT-DNA 55-75, 1 | 7113  | 0 | 0 | 2475 | 304 | 46 | 30 | -15.0% | Dom.  |
| BM | FIT-DNA 55-80, 1 | 7674  | 0 | 0 | 2558 | 307 | 47 | 31 | -14.5% | Dom.  |

|    |                  |       |      |   |      |     |    |    |        |       |
|----|------------------|-------|------|---|------|-----|----|----|--------|-------|
| BM | FIT-DNA 55-85, 1 | 8029  | 0    | 0 | 2605 | 308 | 47 | 31 | -14.5% | Dom.  |
| BM | FIT-DNA 50-75, 1 | 9026  | 0    | 0 | 2962 | 346 | 50 | 32 | -5.6%  | Dom.  |
| BM | FIT-DNA 50-80, 1 | 9589  | 0    | 0 | 3043 | 350 | 51 | 33 | -5.1%  | Dom.  |
| BM | FIT-DNA 50-85, 1 | 9937  | 0    | 0 | 3089 | 351 | 51 | 33 | -5.1%  | Dom.  |
| BM | FIT-DNA 45-75, 1 | 11132 | 0    | 0 | 3406 | 374 | 53 | 34 | -0.4%  | 59.4* |
| BM | FIT-DNA 45-80, 1 | 11687 | 0    | 0 | 3486 | 377 | 54 | 34 | 0%     | 53.7  |
| BM | FIT-DNA 45-85, 1 | 12034 | 0    | 0 | 3532 | 378 | 54 | 34 | 0%     | 61.3  |
| BM | HSgFOBT 55-75, 3 | 4269  | 0    | 0 | 1229 | 206 | 21 | 21 | -14.0% | Dom.  |
| BM | HSgFOBT 55-80, 3 | 4817  | 0    | 0 | 1318 | 216 | 22 | 23 | -14.2% | Dom.  |
| BM | HSgFOBT 55-85, 3 | 5131  | 0    | 0 | 1362 | 219 | 21 | 23 | -15.2% | Dom.  |
| BM | HSgFOBT 50-75, 3 | 5532  | 0    | 0 | 1517 | 241 | 25 | 23 | -13.4% | Dom.  |
| BM | HSgFOBT 50-80, 3 | 6024  | 0    | 0 | 1593 | 249 | 25 | 25 | -13.1% | Dom.  |
| BM | HSgFOBT 50-85, 3 | 6185  | 0    | 0 | 1615 | 251 | 25 | 25 | -13.3% | Dom.  |
| BM | HSgFOBT 45-75, 3 | 6836  | 0    | 0 | 1775 | 267 | 28 | 25 | -13.2% | Dom.  |
| BM | HSgFOBT 45-80, 3 | 7087  | 0    | 0 | 1812 | 271 | 28 | 26 | -13.0% | Dom.  |
| BM | HSgFOBT 45-85, 3 | 7424  | 0    | 0 | 1858 | 274 | 28 | 26 | -12.8% | Dom.  |
| BM | HSgFOBT 55-75, 2 | 5861  | 0    | 0 | 1565 | 241 | 28 | 24 | -14.9% | Dom.  |
| BM | HSgFOBT 55-80, 2 | 6302  | 0    | 0 | 1627 | 247 | 28 | 26 | -15.1% | Dom.  |
| BM | HSgFOBT 55-85, 2 | 6712  | 0    | 0 | 1678 | 250 | 28 | 26 | -15.9% | Dom.  |
| BM | HSgFOBT 50-75, 2 | 7271  | 0    | 0 | 1884 | 278 | 32 | 26 | -12.2% | Dom.  |
| BM | HSgFOBT 50-80, 2 | 7913  | 0    | 0 | 1971 | 286 | 33 | 28 | -11.4% | Dom.  |
| BM | HSgFOBT 50-85, 2 | 8179  | 0    | 0 | 2003 | 288 | 33 | 28 | -11.5% | Dom.  |
| BM | HSgFOBT 45-75, 2 | 9028  | 0    | 0 | 2209 | 307 | 35 | 28 | -9.8%  | Dom.  |
| BM | HSgFOBT 45-80, 2 | 9447  | 0    | 0 | 2266 | 312 | 36 | 29 | -9.4%  | Dom.  |
| BM | HSgFOBT 45-85, 2 | 9842  | 0    | 0 | 2313 | 314 | 35 | 30 | -9.6%  | Dom.  |
| BM | HSgFOBT 55-75, 1 | 8639  | 0    | 0 | 2107 | 281 | 38 | 28 | -15.5% | Dom.  |
| BM | HSgFOBT 55-80, 1 | 9362  | 0    | 0 | 2191 | 286 | 39 | 29 | -15.5% | Dom.  |
| BM | HSgFOBT 55-85, 1 | 9809  | 0    | 0 | 2238 | 287 | 39 | 29 | -15.9% | Dom.  |
| BM | HSgFOBT 50-75, 1 | 10890 | 0    | 0 | 2555 | 323 | 43 | 30 | -10.2% | Dom.  |
| BM | HSgFOBT 50-80, 1 | 11597 | 0    | 0 | 2635 | 328 | 43 | 31 | -9.3%  | Dom.  |
| BM | HSgFOBT 50-85, 1 | 12034 | 0    | 0 | 2680 | 329 | 44 | 32 | -9.1%  | Dom.  |
| BM | HSgFOBT 45-75, 1 | 13309 | 0    | 0 | 2965 | 351 | 46 | 32 | -4.4%  | Dom.  |
| BM | HSgFOBT 45-80, 1 | 14005 | 0    | 0 | 3042 | 355 | 47 | 33 | -3.6%  | Dom.  |
| BM | HSgFOBT 45-85, 1 | 14438 | 0    | 0 | 3086 | 357 | 47 | 33 | -3.5%  | Dom.  |
| BM | SIG 55-75, 10    | 0     | 1701 | 0 | 2327 | 276 | 45 | 28 | 0%     | 8.1   |
| BM | SIG 55-80, 10    | 0     | 1701 | 0 | 2327 | 276 | 45 | 28 | 0%     | 8.1   |
| BM | SIG 55-85, 10    | 0     | 1812 | 0 | 2359 | 276 | 45 | 28 | -1.1%  | 61.5* |
| BM | SIG 50-75, 10    | 0     | 1954 | 0 | 2607 | 308 | 48 | 29 | 0%     | 8.8   |
| BM | SIG 50-80, 10    | 0     | 2142 | 0 | 2679 | 311 | 48 | 30 | -0.7%  | 26.2* |
| BM | SIG 50-85, 10    | 0     | 2142 | 0 | 2679 | 311 | 48 | 30 | -0.7%  | 26.2* |
| BM | SIG 45-75, 10    | 0     | 2479 | 0 | 2915 | 328 | 50 | 31 | 0%     | 15.0  |
| BM | SIG 45-80, 10    | 0     | 2479 | 0 | 2915 | 328 | 50 | 31 | 0%     | 15.0  |
| BM | SIG 45-85, 10    | 0     | 2588 | 0 | 2947 | 329 | 50 | 31 | -0.5%  | 62.2* |
| BM | SIG 55-75, 5     | 0     | 2304 | 0 | 2554 | 292 | 48 | 30 | -3.3%  | Dom.  |
| BM | SIG 55-80, 5     | 0     | 2451 | 0 | 2593 | 293 | 48 | 30 | -4.4%  | Dom.  |
| BM | SIG 55-85, 5     | 0     | 2538 | 0 | 2612 | 293 | 48 | 30 | -4.9%  | Dom.  |

|    |               |   |      |      |      |     |    |    |       |       |
|----|---------------|---|------|------|------|-----|----|----|-------|-------|
| BM | SIG 50-75, 5  | 0 | 2895 | 0    | 2966 | 330 | 52 | 31 | -0.6% | 39.3* |
| BM | SIG 50-80, 5  | 0 | 3040 | 0    | 3005 | 331 | 52 | 32 | -1.0% | 38.3* |
| BM | SIG 50-85, 5  | 0 | 3127 | 0    | 3024 | 331 | 52 | 32 | -1.3% | 43.0* |
| BM | SIG 45-75, 5  | 0 | 3565 | 0    | 3309 | 354 | 54 | 32 | 0%    | 15.4  |
| BM | SIG 45-80, 5  | 0 | 3710 | 0    | 3348 | 355 | 54 | 33 | 0%    | 38.4  |
| BM | SIG 45-85, 5  | 0 | 3797 | 0    | 3366 | 355 | 54 | 33 | 0%    | 97.7  |
| BM | CTC 55-75, 10 | 0 | 0    | 1914 | 1513 | 238 | 33 | 24 | 0%    | 6.0   |
| BM | CTC 55-80, 10 | 0 | 0    | 1914 | 1513 | 238 | 33 | 24 | 0%    | 6.0   |
| BM | CTC 55-85, 10 | 0 | 0    | 2064 | 1560 | 241 | 33 | 25 | -2.2% | Dom.  |
| BM | CTC 50-75, 10 | 0 | 0    | 2186 | 1649 | 261 | 35 | 25 | 0%    | 6.1   |
| BM | CTC 50-80, 10 | 0 | 0    | 2439 | 1734 | 269 | 36 | 26 | -0.7% | 10.0* |
| BM | CTC 50-85, 10 | 0 | 0    | 2439 | 1734 | 269 | 36 | 26 | -0.7% | 10.0* |
| BM | CTC 45-75, 10 | 0 | 0    | 2794 | 1856 | 281 | 37 | 26 | -1.9% | Dom.  |
| BM | CTC 45-80, 10 | 0 | 0    | 2794 | 1856 | 281 | 37 | 26 | -1.9% | Dom.  |
| BM | CTC 45-85, 10 | 0 | 0    | 2943 | 1901 | 283 | 37 | 27 | -3.0% | Dom.  |
| BM | CTC 55-75, 5  | 0 | 0    | 2770 | 1830 | 281 | 41 | 28 | -0.7% | 9.0*  |
| BM | CTC 55-80, 5  | 0 | 0    | 2971 | 1881 | 284 | 42 | 29 | -1.6% | 9.8*  |
| BM | CTC 55-85, 5  | 0 | 0    | 3089 | 1907 | 285 | 42 | 29 | -2.5% | Dom.  |
| BM | CTC 50-75, 5  | 0 | 0    | 3485 | 2113 | 318 | 45 | 30 | 0%    | 8.2   |
| BM | CTC 50-80, 5  | 0 | 0    | 3684 | 2163 | 321 | 46 | 31 | -0.4% | 14.1* |
| BM | CTC 50-85, 5  | 0 | 0    | 3801 | 2189 | 322 | 46 | 31 | -1.0% | 17.7* |
| BM | CTC 45-75, 5  | 0 | 0    | 4258 | 2351 | 341 | 47 | 31 | 0%    | 10.1  |
| BM | CTC 45-80, 5  | 0 | 0    | 4455 | 2400 | 345 | 48 | 32 | 0%    | 13.8  |
| BM | CTC 45-85, 5  | 0 | 0    | 4572 | 2426 | 345 | 48 | 32 | 0%    | 36.6  |

**SimCRC - Scenario 1: Stable CRC risk**

|    |               |   |   |   |      |     |    |    |        |        |
|----|---------------|---|---|---|------|-----|----|----|--------|--------|
| BM | No screening  | 0 | 0 | 0 | 59   | 0   | 0  | 0  | -      | -      |
| BM | COL 55-75, 15 | 0 | 0 | 0 | 2753 | 195 | 42 | 21 | 0%     | 13.8   |
| BM | COL 55-80, 15 | 0 | 0 | 0 | 2753 | 195 | 42 | 21 | 0%     | 13.8   |
| BM | COL 55-85, 15 | 0 | 0 | 0 | 2930 | 196 | 42 | 21 | -8.8%  | Dom.   |
| BM | COL 50-75, 15 | 0 | 0 | 0 | 3027 | 222 | 44 | 22 | 0%     | 10.2   |
| BM | COL 50-80, 15 | 0 | 0 | 0 | 3351 | 226 | 46 | 22 | -3.5%  | Dom.   |
| BM | COL 50-85, 15 | 0 | 0 | 0 | 3351 | 226 | 46 | 22 | -3.5%  | Dom.   |
| BM | COL 45-75, 15 | 0 | 0 | 0 | 3748 | 248 | 48 | 23 | 0%     | 27.7   |
| BM | COL 45-80, 15 | 0 | 0 | 0 | 3748 | 248 | 48 | 23 | 0%     | 27.7   |
| BM | COL 45-85, 15 | 0 | 0 | 0 | 3748 | 248 | 48 | 23 | 0%     | 27.7   |
| BM | COL 55-75, 10 | 0 | 0 | 0 | 3302 | 204 | 44 | 22 | -12.3% | Dom.   |
| BM | COL 55-80, 10 | 0 | 0 | 0 | 3302 | 204 | 44 | 22 | -12.3% | Dom.   |
| BM | COL 55-85, 10 | 0 | 0 | 0 | 3448 | 204 | 44 | 22 | -14.1% | Dom.   |
| BM | COL 50-75, 10 | 0 | 0 | 0 | 3745 | 235 | 48 | 23 | -5.4%  | Dom.   |
| BM | COL 50-80, 10 | 0 | 0 | 0 | 4011 | 236 | 48 | 23 | -6.5%  | Dom.   |
| BM | COL 50-85, 10 | 0 | 0 | 0 | 4011 | 236 | 48 | 23 | -6.5%  | Dom.   |
| BM | COL 45-75, 10 | 0 | 0 | 0 | 4519 | 262 | 51 | 24 | 0%     | 57.9   |
| BM | COL 45-80, 10 | 0 | 0 | 0 | 4519 | 262 | 51 | 24 | 0%     | 57.9   |
| BM | COL 45-85, 10 | 0 | 0 | 0 | 4665 | 262 | 51 | 25 | -0.1%  | 434.1* |
| BM | COL 55-75, 5  | 0 | 0 | 0 | 4404 | 210 | 46 | 22 | -19.1% | Dom.   |
| BM | COL 55-80, 5  | 0 | 0 | 0 | 4616 | 210 | 46 | 22 | -19.7% | Dom.   |

|    |                  |       |   |   |      |     |    |    |        |        |
|----|------------------|-------|---|---|------|-----|----|----|--------|--------|
| BM | COL 55-85, 5     | 0     | 0 | 0 | 4735 | 211 | 46 | 22 | -19.9% | Dom.   |
| BM | COL 50-75, 5     | 0     | 0 | 0 | 5417 | 244 | 50 | 24 | -8.2%  | Dom.   |
| BM | COL 50-80, 5     | 0     | 0 | 0 | 5629 | 245 | 51 | 24 | -8.4%  | Dom.   |
| BM | COL 50-85, 5     | 0     | 0 | 0 | 5748 | 245 | 51 | 24 | -8.5%  | Dom.   |
| BM | COL 45-75, 5     | 0     | 0 | 0 | 6456 | 271 | 53 | 25 | 0%     | 205.1  |
| BM | COL 45-80, 5     | 0     | 0 | 0 | 6668 | 272 | 53 | 25 | 0%     | 484.2  |
| BM | COL 45-85, 5     | 0     | 0 | 0 | 6787 | 272 | 53 | 25 | 0%     | 1369.7 |
| BM | FIT 55-75, 3     | 4788  | 0 | 0 | 782  | 142 | 23 | 15 | 0%     | 5.1    |
| BM | FIT 55-80, 3     | 5489  | 0 | 0 | 867  | 150 | 24 | 16 | -4.7%  | Dom.   |
| BM | FIT 55-85, 3     | 5865  | 0 | 0 | 910  | 152 | 24 | 17 | -8.0%  | Dom.   |
| BM | FIT 50-75, 3     | 6294  | 0 | 0 | 946  | 172 | 27 | 17 | 0%     | 5.5    |
| BM | FIT 50-80, 3     | 6881  | 0 | 0 | 1017 | 178 | 27 | 18 | -3.1%  | Dom.   |
| BM | FIT 50-85, 3     | 7152  | 0 | 0 | 1046 | 179 | 27 | 18 | -4.8%  | Dom.   |
| BM | FIT 45-75, 3     | 7763  | 0 | 0 | 1085 | 195 | 29 | 18 | 0%     | 6.1    |
| BM | FIT 45-80, 3     | 8183  | 0 | 0 | 1131 | 199 | 30 | 19 | 0.0%   | 11.5*  |
| BM | FIT 45-85, 3     | 8623  | 0 | 0 | 1181 | 201 | 30 | 19 | -0.9%  | 14.5*  |
| BM | FIT 55-75, 2     | 6797  | 0 | 0 | 1012 | 165 | 28 | 17 | -9.8%  | Dom.   |
| BM | FIT 55-80, 2     | 7403  | 0 | 0 | 1076 | 169 | 29 | 18 | -12.4% | Dom.   |
| BM | FIT 55-85, 2     | 7981  | 0 | 0 | 1133 | 171 | 29 | 19 | -13.7% | Dom.   |
| BM | FIT 50-75, 2     | 8516  | 0 | 0 | 1180 | 194 | 32 | 19 | -4.6%  | Dom.   |
| BM | FIT 50-80, 2     | 9417  | 0 | 0 | 1271 | 200 | 33 | 20 | -5.3%  | Dom.   |
| BM | FIT 50-85, 2     | 9799  | 0 | 0 | 1308 | 201 | 33 | 20 | -6.1%  | Dom.   |
| BM | FIT 45-75, 2     | 10684 | 0 | 0 | 1366 | 219 | 35 | 20 | 0%     | 11.4   |
| BM | FIT 45-80, 2     | 11281 | 0 | 0 | 1426 | 223 | 36 | 21 | 0%     | 15.3   |
| BM | FIT 45-85, 2     | 11852 | 0 | 0 | 1481 | 225 | 36 | 21 | -0.3%  | 26.9*  |
| BM | FIT 55-75, 1     | 11113 | 0 | 0 | 1407 | 188 | 35 | 20 | -15.4% | Dom.   |
| BM | FIT 55-80, 1     | 12291 | 0 | 0 | 1502 | 192 | 36 | 20 | -15.6% | Dom.   |
| BM | FIT 55-85, 1     | 13027 | 0 | 0 | 1558 | 193 | 37 | 21 | -16.1% | Dom.   |
| BM | FIT 50-75, 1     | 14301 | 0 | 0 | 1671 | 221 | 40 | 21 | -6.2%  | Dom.   |
| BM | FIT 50-80, 1     | 15470 | 0 | 0 | 1764 | 224 | 41 | 22 | -6.4%  | Dom.   |
| BM | FIT 50-85, 1     | 16201 | 0 | 0 | 1819 | 225 | 41 | 22 | -7.0%  | Dom.   |
| BM | FIT 45-75, 1     | 17665 | 0 | 0 | 1914 | 247 | 43 | 23 | 0%     | 20.8   |
| BM | FIT 45-80, 1     | 18830 | 0 | 0 | 2006 | 250 | 44 | 23 | 0%     | 26.2   |
| BM | FIT 45-85, 1     | 19559 | 0 | 0 | 2060 | 251 | 44 | 24 | 0%     | 52.0   |
| BM | FIT-DNA 55-75, 5 | 3198  | 0 | 0 | 1110 | 156 | 28 | 16 | -20.8% | Dom.   |
| BM | FIT-DNA 55-80, 5 | 3471  | 0 | 0 | 1176 | 159 | 28 | 17 | -21.5% | Dom.   |
| BM | FIT-DNA 55-85, 5 | 3633  | 0 | 0 | 1213 | 160 | 28 | 17 | -22.3% | Dom.   |
| BM | FIT-DNA 50-75, 5 | 3996  | 0 | 0 | 1305 | 183 | 32 | 18 | -14.3% | Dom.   |
| BM | FIT-DNA 50-80, 5 | 4267  | 0 | 0 | 1369 | 186 | 32 | 19 | -15.1% | Dom.   |
| BM | FIT-DNA 50-85, 5 | 4427  | 0 | 0 | 1405 | 187 | 32 | 19 | -15.6% | Dom.   |
| BM | FIT-DNA 45-75, 5 | 4828  | 0 | 0 | 1483 | 205 | 34 | 19 | -9.2%  | Dom.   |
| BM | FIT-DNA 45-80, 5 | 5098  | 0 | 0 | 1546 | 208 | 35 | 20 | -9.1%  | Dom.   |
| BM | FIT-DNA 45-85, 5 | 5258  | 0 | 0 | 1582 | 209 | 35 | 20 | -9.4%  | Dom.   |
| BM | FIT-DNA 55-75, 3 | 4197  | 0 | 0 | 1346 | 176 | 33 | 18 | -19.3% | Dom.   |
| BM | FIT-DNA 55-80, 3 | 4731  | 0 | 0 | 1462 | 181 | 34 | 19 | -19.6% | Dom.   |
| BM | FIT-DNA 55-85, 3 | 4979  | 0 | 0 | 1513 | 182 | 34 | 20 | -20.0% | Dom.   |



|    |                  |       |      |   |      |     |    |    |        |        |
|----|------------------|-------|------|---|------|-----|----|----|--------|--------|
| BM | FIT-DNA 50-75, 3 | 5457  | 0    | 0 | 1630 | 208 | 37 | 20 | -10.7% | Dom.   |
| BM | FIT-DNA 50-80, 3 | 5851  | 0    | 0 | 1714 | 212 | 38 | 21 | -10.7% | Dom.   |
| BM | FIT-DNA 50-85, 3 | 6117  | 0    | 0 | 1766 | 213 | 38 | 21 | -11.2% | Dom.   |
| BM | FIT-DNA 45-75, 3 | 6624  | 0    | 0 | 1860 | 232 | 40 | 21 | -4.8%  | Dom.   |
| BM | FIT-DNA 45-80, 3 | 7045  | 0    | 0 | 1946 | 236 | 41 | 22 | -4.8%  | Dom.   |
| BM | FIT-DNA 45-85, 3 | 7345  | 0    | 0 | 2007 | 237 | 41 | 23 | -5.2%  | Dom.   |
| BM | FIT-DNA 55-75, 1 | 7867  | 0    | 0 | 2066 | 199 | 41 | 21 | -20.8% | Dom.   |
| BM | FIT-DNA 55-80, 1 | 8588  | 0    | 0 | 2185 | 201 | 41 | 21 | -20.3% | Dom.   |
| BM | FIT-DNA 55-85, 1 | 9043  | 0    | 0 | 2256 | 202 | 42 | 21 | -20.3% | Dom.   |
| BM | FIT-DNA 50-75, 1 | 10012 | 0    | 0 | 2462 | 231 | 45 | 23 | -9.3%  | Dom.   |
| BM | FIT-DNA 50-80, 1 | 10746 | 0    | 0 | 2582 | 234 | 46 | 23 | -8.8%  | Dom.   |
| BM | FIT-DNA 50-85, 1 | 11196 | 0    | 0 | 2652 | 234 | 46 | 23 | -8.8%  | Dom.   |
| BM | FIT-DNA 45-75, 1 | 12303 | 0    | 0 | 2843 | 258 | 48 | 24 | -0.4%  | 121.1* |
| BM | FIT-DNA 45-80, 1 | 13030 | 0    | 0 | 2961 | 260 | 48 | 24 | 0%     | 104.5  |
| BM | FIT-DNA 45-85, 1 | 13480 | 0    | 0 | 3031 | 260 | 49 | 24 | 0%     | 123.0  |
| BM | HSgFOBT 55-75, 3 | 4530  | 0    | 0 | 998  | 142 | 24 | 15 | -21.2% | Dom.   |
| BM | HSgFOBT 55-80, 3 | 5161  | 0    | 0 | 1099 | 149 | 25 | 16 | -23.7% | Dom.   |
| BM | HSgFOBT 55-85, 3 | 5473  | 0    | 0 | 1147 | 151 | 25 | 17 | -24.4% | Dom.   |
| BM | HSgFOBT 50-75, 3 | 5907  | 0    | 0 | 1229 | 173 | 28 | 17 | -16.7% | Dom.   |
| BM | HSgFOBT 50-80, 3 | 6394  | 0    | 0 | 1307 | 178 | 29 | 18 | -17.0% | Dom.   |
| BM | HSgFOBT 50-85, 3 | 6680  | 0    | 0 | 1347 | 179 | 29 | 18 | -17.7% | Dom.   |
| BM | HSgFOBT 45-75, 3 | 7191  | 0    | 0 | 1423 | 195 | 31 | 18 | -12.4% | Dom.   |
| BM | HSgFOBT 45-80, 3 | 7636  | 0    | 0 | 1489 | 199 | 31 | 19 | -11.8% | Dom.   |
| BM | HSgFOBT 45-85, 3 | 8010  | 0    | 0 | 1545 | 202 | 32 | 19 | -11.9% | Dom.   |
| BM | HSgFOBT 55-75, 2 | 6176  | 0    | 0 | 1285 | 165 | 29 | 17 | -22.3% | Dom.   |
| BM | HSgFOBT 55-80, 2 | 6699  | 0    | 0 | 1361 | 169 | 30 | 18 | -22.9% | Dom.   |
| BM | HSgFOBT 55-85, 2 | 7195  | 0    | 0 | 1429 | 171 | 30 | 19 | -23.6% | Dom.   |
| BM | HSgFOBT 50-75, 2 | 7679  | 0    | 0 | 1523 | 195 | 33 | 19 | -14.6% | Dom.   |
| BM | HSgFOBT 50-80, 2 | 8455  | 0    | 0 | 1634 | 200 | 34 | 20 | -14.3% | Dom.   |
| BM | HSgFOBT 50-85, 2 | 8781  | 0    | 0 | 1678 | 201 | 34 | 20 | -14.5% | Dom.   |
| BM | HSgFOBT 45-75, 2 | 9567  | 0    | 0 | 1791 | 220 | 36 | 21 | -8.5%  | Dom.   |
| BM | HSgFOBT 45-80, 2 | 10080 | 0    | 0 | 1863 | 224 | 37 | 21 | -8.4%  | Dom.   |
| BM | HSgFOBT 45-85, 2 | 10568 | 0    | 0 | 1929 | 226 | 37 | 22 | -8.8%  | Dom.   |
| BM | HSgFOBT 55-75, 1 | 9260  | 0    | 0 | 1756 | 188 | 36 | 20 | -21.4% | Dom.   |
| BM | HSgFOBT 55-80, 1 | 10168 | 0    | 0 | 1869 | 191 | 37 | 20 | -21.9% | Dom.   |
| BM | HSgFOBT 55-85, 1 | 10734 | 0    | 0 | 1936 | 192 | 37 | 21 | -22.4% | Dom.   |
| BM | HSgFOBT 50-75, 1 | 11759 | 0    | 0 | 2111 | 220 | 41 | 22 | -12.4% | Dom.   |
| BM | HSgFOBT 50-80, 1 | 12665 | 0    | 0 | 2222 | 224 | 42 | 22 | -11.6% | Dom.   |
| BM | HSgFOBT 50-85, 1 | 13228 | 0    | 0 | 2288 | 224 | 42 | 22 | -11.4% | Dom.   |
| BM | HSgFOBT 45-75, 1 | 14396 | 0    | 0 | 2448 | 247 | 44 | 23 | -3.2%  | Dom.   |
| BM | HSgFOBT 45-80, 1 | 15296 | 0    | 0 | 2559 | 250 | 45 | 23 | -2.4%  | Dom.   |
| BM | HSgFOBT 45-85, 1 | 15856 | 0    | 0 | 2624 | 251 | 45 | 24 | -2.3%  | Dom.   |
| BM | SIG 55-75, 10    | 0     | 2031 | 0 | 1214 | 149 | 32 | 16 | 0%     | 7.8    |
| BM | SIG 55-80, 10    | 0     | 2031 | 0 | 1214 | 149 | 32 | 16 | 0%     | 7.8    |
| BM | SIG 55-85, 10    | 0     | 2210 | 0 | 1275 | 150 | 32 | 16 | -9.7%  | Dom.   |
| BM | SIG 50-75, 10    | 0     | 2295 | 0 | 1311 | 171 | 34 | 17 | 0%     | 4.4    |

|    |               |   |      |      |      |     |    |    |        |       |
|----|---------------|---|------|------|------|-----|----|----|--------|-------|
| BM | SIG 50-80, 10 | 0 | 2593 | 0    | 1420 | 174 | 35 | 18 | -4.4%  | Dom.  |
| BM | SIG 50-85, 10 | 0 | 2593 | 0    | 1420 | 174 | 35 | 18 | -4.4%  | Dom.  |
| BM | SIG 45-75, 10 | 0 | 2938 | 0    | 1530 | 194 | 37 | 19 | 0%     | 9.4   |
| BM | SIG 45-80, 10 | 0 | 2938 | 0    | 1530 | 194 | 37 | 19 | 0%     | 9.4   |
| BM | SIG 45-85, 10 | 0 | 3116 | 0    | 1590 | 195 | 38 | 19 | -1.2%  | 65.7* |
| BM | SIG 55-75, 5  | 0 | 2969 | 0    | 1500 | 164 | 36 | 18 | -13.9% | Dom.  |
| BM | SIG 55-80, 5  | 0 | 3208 | 0    | 1568 | 166 | 36 | 18 | -15.5% | Dom.  |
| BM | SIG 55-85, 5  | 0 | 3348 | 0    | 1605 | 166 | 37 | 18 | -16.1% | Dom.  |
| BM | SIG 50-75, 5  | 0 | 3721 | 0    | 1744 | 193 | 40 | 19 | -5.8%  | Dom.  |
| BM | SIG 50-80, 5  | 0 | 3957 | 0    | 1811 | 195 | 40 | 20 | -6.7%  | Dom.  |
| BM | SIG 50-85, 5  | 0 | 4096 | 0    | 1848 | 195 | 40 | 20 | -7.4%  | Dom.  |
| BM | SIG 45-75, 5  | 0 | 4511 | 0    | 1966 | 217 | 42 | 21 | 0%     | 18.8  |
| BM | SIG 45-80, 5  | 0 | 4746 | 0    | 2032 | 219 | 43 | 21 | 0%     | 48.4  |
| BM | SIG 45-85, 5  | 0 | 4885 | 0    | 2069 | 219 | 43 | 21 | 0%     | 104.6 |
| BM | CTC 55-75, 10 | 0 | 0    | 2003 | 1345 | 179 | 38 | 19 | 0%     | 7.2   |
| BM | CTC 55-80, 10 | 0 | 0    | 2003 | 1345 | 179 | 38 | 19 | 0%     | 7.2   |
| BM | CTC 55-85, 10 | 0 | 0    | 2171 | 1414 | 180 | 38 | 19 | -10.6% | Dom.  |
| BM | CTC 50-75, 10 | 0 | 0    | 2271 | 1431 | 205 | 40 | 20 | 0%     | 3.5   |
| BM | CTC 50-80, 10 | 0 | 0    | 2557 | 1554 | 208 | 41 | 21 | -4.4%  | Dom.  |
| BM | CTC 50-85, 10 | 0 | 0    | 2557 | 1554 | 208 | 41 | 21 | -4.4%  | Dom.  |
| BM | CTC 45-75, 10 | 0 | 0    | 2907 | 1655 | 229 | 43 | 22 | 0%     | 9.0   |
| BM | CTC 45-80, 10 | 0 | 0    | 2907 | 1655 | 229 | 43 | 22 | 0%     | 9.0   |
| BM | CTC 45-85, 10 | 0 | 0    | 3075 | 1723 | 230 | 43 | 22 | -1.1%  | 68.2* |
| BM | CTC 55-75, 5  | 0 | 0    | 2917 | 1620 | 194 | 41 | 21 | -14.0% | Dom.  |
| BM | CTC 55-80, 5  | 0 | 0    | 3143 | 1691 | 195 | 42 | 21 | -15.5% | Dom.  |
| BM | CTC 55-85, 5  | 0 | 0    | 3274 | 1730 | 196 | 42 | 21 | -16.1% | Dom.  |
| BM | CTC 50-75, 5  | 0 | 0    | 3671 | 1857 | 226 | 45 | 22 | -5.7%  | Dom.  |
| BM | CTC 50-80, 5  | 0 | 0    | 3896 | 1928 | 228 | 46 | 23 | -6.6%  | Dom.  |
| BM | CTC 50-85, 5  | 0 | 0    | 4027 | 1966 | 228 | 46 | 23 | -7.2%  | Dom.  |
| BM | CTC 45-75, 5  | 0 | 0    | 4469 | 2069 | 251 | 48 | 23 | 0%     | 19.0  |
| BM | CTC 45-80, 5  | 0 | 0    | 4694 | 2139 | 252 | 48 | 24 | 0%     | 49.4  |
| BM | CTC 45-85, 5  | 0 | 0    | 4824 | 2177 | 253 | 49 | 24 | 0%     | 119.8 |

#### SimCRC - Scenario 2: Increased CRC risk

|    |               |   |   |   |      |     |    |    |        |      |
|----|---------------|---|---|---|------|-----|----|----|--------|------|
| BM | No screening  | 0 | 0 | 0 | 92   | 0   | 0  | 0  | -      | -    |
| BM | COL 55-75, 15 | 0 | 0 | 0 | 2870 | 314 | 63 | 32 | 0%     | 8.8  |
| BM | COL 55-80, 15 | 0 | 0 | 0 | 2870 | 314 | 63 | 32 | 0%     | 8.8  |
| BM | COL 55-85, 15 | 0 | 0 | 0 | 3033 | 316 | 63 | 32 | -7.8%  | Dom. |
| BM | COL 50-75, 15 | 0 | 0 | 0 | 3177 | 359 | 66 | 34 | 0%     | 6.8  |
| BM | COL 50-80, 15 | 0 | 0 | 0 | 3479 | 365 | 69 | 35 | -3.2%  | Dom. |
| BM | COL 50-85, 15 | 0 | 0 | 0 | 3479 | 365 | 69 | 35 | -3.2%  | Dom. |
| BM | COL 45-75, 15 | 0 | 0 | 0 | 3898 | 402 | 72 | 36 | 0%     | 17.0 |
| BM | COL 45-80, 15 | 0 | 0 | 0 | 3898 | 402 | 72 | 36 | 0%     | 17.0 |
| BM | COL 45-85, 15 | 0 | 0 | 0 | 3898 | 402 | 72 | 36 | 0%     | 17.0 |
| BM | COL 55-75, 10 | 0 | 0 | 0 | 3393 | 329 | 67 | 34 | -11.5% | Dom. |
| BM | COL 55-80, 10 | 0 | 0 | 0 | 3393 | 329 | 67 | 34 | -11.5% | Dom. |
| BM | COL 55-85, 10 | 0 | 0 | 0 | 3526 | 330 | 67 | 34 | -13.2% | Dom. |

|    |                  |       |   |   |      |     |    |    |        |        |
|----|------------------|-------|---|---|------|-----|----|----|--------|--------|
| BM | COL 50-75, 10    | 0     | 0 | 0 | 3869 | 381 | 72 | 36 | -4.9%  | Dom.   |
| BM | COL 50-80, 10    | 0     | 0 | 0 | 4114 | 383 | 73 | 37 | -6.2%  | Dom.   |
| BM | COL 50-85, 10    | 0     | 0 | 0 | 4114 | 383 | 73 | 37 | -6.2%  | Dom.   |
| BM | COL 45-75, 10    | 0     | 0 | 0 | 4648 | 426 | 77 | 38 | 0%     | 31.0   |
| BM | COL 45-80, 10    | 0     | 0 | 0 | 4648 | 426 | 77 | 38 | 0%     | 31.0   |
| BM | COL 45-85, 10    | 0     | 0 | 0 | 4781 | 426 | 77 | 39 | -0.1%  | 206.8* |
| BM | COL 55-75, 5     | 0     | 0 | 0 | 4430 | 340 | 70 | 35 | -18.8% | Dom.   |
| BM | COL 55-80, 5     | 0     | 0 | 0 | 4623 | 341 | 70 | 35 | -19.8% | Dom.   |
| BM | COL 55-85, 5     | 0     | 0 | 0 | 4730 | 341 | 70 | 35 | -20.0% | Dom.   |
| BM | COL 50-75, 5     | 0     | 0 | 0 | 5450 | 398 | 76 | 38 | -8.2%  | Dom.   |
| BM | COL 50-80, 5     | 0     | 0 | 0 | 5643 | 399 | 77 | 38 | -8.4%  | Dom.   |
| BM | COL 50-85, 5     | 0     | 0 | 0 | 5749 | 399 | 77 | 38 | -8.6%  | Dom.   |
| BM | COL 45-75, 5     | 0     | 0 | 0 | 6496 | 443 | 81 | 40 | 0%     | 106.4  |
| BM | COL 45-80, 5     | 0     | 0 | 0 | 6689 | 444 | 81 | 40 | 0%     | 226.0  |
| BM | COL 45-85, 5     | 0     | 0 | 0 | 6795 | 444 | 81 | 40 | 0%     | 618.3  |
| BM | FIT 55-75, 3     | 4642  | 0 | 0 | 947  | 234 | 36 | 23 | 0%     | 3.7    |
| BM | FIT 55-80, 3     | 5288  | 0 | 0 | 1035 | 245 | 38 | 25 | -4.3%  | Dom.   |
| BM | FIT 55-85, 3     | 5627  | 0 | 0 | 1078 | 248 | 38 | 26 | -7.3%  | Dom.   |
| BM | FIT 50-75, 3     | 6107  | 0 | 0 | 1139 | 283 | 42 | 27 | 0%     | 3.9    |
| BM | FIT 50-80, 3     | 6645  | 0 | 0 | 1211 | 292 | 44 | 28 | -2.9%  | Dom.   |
| BM | FIT 50-85, 3     | 6891  | 0 | 0 | 1241 | 294 | 44 | 29 | -4.4%  | Dom.   |
| BM | FIT 45-75, 3     | 7548  | 0 | 0 | 1301 | 321 | 47 | 29 | 0%     | 4.2    |
| BM | FIT 45-80, 3     | 7934  | 0 | 0 | 1349 | 327 | 48 | 30 | -0.1%  | 8.0*   |
| BM | FIT 45-85, 3     | 8331  | 0 | 0 | 1398 | 331 | 48 | 31 | -1.0%  | 10.3*  |
| BM | FIT 55-75, 2     | 6534  | 0 | 0 | 1195 | 269 | 44 | 27 | -9.2%  | Dom.   |
| BM | FIT 55-80, 2     | 7086  | 0 | 0 | 1260 | 275 | 45 | 28 | -11.6% | Dom.   |
| BM | FIT 55-85, 2     | 7604  | 0 | 0 | 1315 | 278 | 46 | 29 | -13.9% | Dom.   |
| BM | FIT 50-75, 2     | 8220  | 0 | 0 | 1390 | 317 | 50 | 30 | -4.9%  | Dom.   |
| BM | FIT 50-80, 2     | 9040  | 0 | 0 | 1483 | 326 | 52 | 31 | -5.7%  | Dom.   |
| BM | FIT 50-85, 2     | 9381  | 0 | 0 | 1519 | 328 | 52 | 32 | -6.5%  | Dom.   |
| BM | FIT 45-75, 2     | 10333 | 0 | 0 | 1602 | 361 | 55 | 32 | 0%     | 7.6    |
| BM | FIT 45-80, 2     | 10876 | 0 | 0 | 1663 | 367 | 56 | 33 | 0%     | 10.5   |
| BM | FIT 45-85, 2     | 11388 | 0 | 0 | 1717 | 370 | 56 | 34 | -0.3%  | 19.6*  |
| BM | FIT 55-75, 1     | 10581 | 0 | 0 | 1601 | 305 | 54 | 31 | -15.6% | Dom.   |
| BM | FIT 55-80, 1     | 11643 | 0 | 0 | 1694 | 310 | 56 | 32 | -16.0% | Dom.   |
| BM | FIT 55-85, 1     | 12296 | 0 | 0 | 1747 | 312 | 56 | 32 | -16.5% | Dom.   |
| BM | FIT 50-75, 1     | 13674 | 0 | 0 | 1895 | 359 | 61 | 34 | -6.5%  | Dom.   |
| BM | FIT 50-80, 1     | 14728 | 0 | 0 | 1986 | 365 | 63 | 35 | -6.8%  | Dom.   |
| BM | FIT 50-85, 1     | 15379 | 0 | 0 | 2038 | 366 | 63 | 35 | -7.3%  | Dom.   |
| BM | FIT 45-75, 1     | 16963 | 0 | 0 | 2163 | 404 | 66 | 36 | 0%     | 13.5   |
| BM | FIT 45-80, 1     | 18013 | 0 | 0 | 2253 | 409 | 67 | 37 | 0%     | 17.3   |
| BM | FIT 45-85, 1     | 18661 | 0 | 0 | 2305 | 411 | 68 | 37 | 0%     | 35.2   |
| BM | FIT-DNA 55-75, 5 | 3096  | 0 | 0 | 1280 | 255 | 44 | 26 | -19.3% | Dom.   |
| BM | FIT-DNA 55-80, 5 | 3347  | 0 | 0 | 1345 | 260 | 45 | 27 | -20.6% | Dom.   |
| BM | FIT-DNA 55-85, 5 | 3492  | 0 | 0 | 1380 | 261 | 45 | 27 | -21.3% | Dom.   |
| BM | FIT-DNA 50-75, 5 | 3877  | 0 | 0 | 1501 | 301 | 50 | 29 | -13.4% | Dom.   |

|    |                  |       |   |   |      |     |    |    |        |       |
|----|------------------|-------|---|---|------|-----|----|----|--------|-------|
| BM | FIT-DNA 50-80, 5 | 4125  | 0 | 0 | 1564 | 306 | 50 | 30 | -14.2% | Dom.  |
| BM | FIT-DNA 50-85, 5 | 4269  | 0 | 0 | 1599 | 307 | 50 | 30 | -14.9% | Dom.  |
| BM | FIT-DNA 45-75, 5 | 4695  | 0 | 0 | 1700 | 338 | 54 | 31 | -8.5%  | Dom.  |
| BM | FIT-DNA 45-80, 5 | 4942  | 0 | 0 | 1762 | 343 | 54 | 32 | -8.5%  | Dom.  |
| BM | FIT-DNA 45-85, 5 | 5085  | 0 | 0 | 1797 | 344 | 54 | 32 | -8.8%  | Dom.  |
| BM | FIT-DNA 55-75, 3 | 4043  | 0 | 0 | 1526 | 286 | 51 | 29 | -18.6% | Dom.  |
| BM | FIT-DNA 55-80, 3 | 4529  | 0 | 0 | 1640 | 294 | 52 | 30 | -19.5% | Dom.  |
| BM | FIT-DNA 55-85, 3 | 4751  | 0 | 0 | 1688 | 295 | 53 | 31 | -20.0% | Dom.  |
| BM | FIT-DNA 50-75, 3 | 5263  | 0 | 0 | 1837 | 340 | 57 | 32 | -10.6% | Dom.  |
| BM | FIT-DNA 50-80, 3 | 5621  | 0 | 0 | 1920 | 345 | 59 | 33 | -10.7% | Dom.  |
| BM | FIT-DNA 50-85, 3 | 5861  | 0 | 0 | 1969 | 346 | 59 | 33 | -11.1% | Dom.  |
| BM | FIT-DNA 45-75, 3 | 6410  | 0 | 0 | 2092 | 381 | 62 | 34 | -4.4%  | Dom.  |
| BM | FIT-DNA 45-80, 3 | 6794  | 0 | 0 | 2176 | 387 | 63 | 35 | -4.5%  | Dom.  |
| BM | FIT-DNA 45-85, 3 | 7063  | 0 | 0 | 2233 | 389 | 64 | 36 | -4.8%  | Dom.  |
| BM | FIT-DNA 55-75, 1 | 7476  | 0 | 0 | 2233 | 322 | 62 | 33 | -21.2% | Dom.  |
| BM | FIT-DNA 55-80, 1 | 8126  | 0 | 0 | 2346 | 325 | 63 | 33 | -20.9% | Dom.  |
| BM | FIT-DNA 55-85, 1 | 8531  | 0 | 0 | 2411 | 326 | 63 | 34 | -20.9% | Dom.  |
| BM | FIT-DNA 50-75, 1 | 9559  | 0 | 0 | 2656 | 376 | 68 | 35 | -9.6%  | Dom.  |
| BM | FIT-DNA 50-80, 1 | 10221 | 0 | 0 | 2770 | 380 | 69 | 36 | -9.1%  | Dom.  |
| BM | FIT-DNA 50-85, 1 | 10622 | 0 | 0 | 2835 | 381 | 70 | 36 | -9.1%  | Dom.  |
| BM | FIT-DNA 45-75, 1 | 11800 | 0 | 0 | 3059 | 420 | 73 | 37 | -0.4%  | 77.9* |
| BM | FIT-DNA 45-80, 1 | 12456 | 0 | 0 | 3172 | 424 | 74 | 38 | 0%     | 65.7  |
| BM | FIT-DNA 45-85, 1 | 12857 | 0 | 0 | 3236 | 425 | 74 | 38 | 0%     | 71.5  |
| BM | HSgFOBT 55-75, 3 | 4401  | 0 | 0 | 1146 | 233 | 38 | 24 | -18.1% | Dom.  |
| BM | HSgFOBT 55-80, 3 | 4984  | 0 | 0 | 1248 | 244 | 39 | 25 | -21.0% | Dom.  |
| BM | HSgFOBT 55-85, 3 | 5267  | 0 | 0 | 1295 | 247 | 40 | 26 | -23.0% | Dom.  |
| BM | HSgFOBT 50-75, 3 | 5743  | 0 | 0 | 1402 | 284 | 44 | 27 | -15.3% | Dom.  |
| BM | HSgFOBT 50-80, 3 | 6191  | 0 | 0 | 1480 | 291 | 45 | 28 | -15.7% | Dom.  |
| BM | HSgFOBT 50-85, 3 | 6450  | 0 | 0 | 1520 | 293 | 45 | 29 | -16.4% | Dom.  |
| BM | HSgFOBT 45-75, 3 | 7007  | 0 | 0 | 1618 | 321 | 48 | 29 | -11.4% | Dom.  |
| BM | HSgFOBT 45-80, 3 | 7417  | 0 | 0 | 1683 | 328 | 50 | 30 | -11.1% | Dom.  |
| BM | HSgFOBT 45-85, 3 | 7756  | 0 | 0 | 1738 | 331 | 50 | 31 | -11.2% | Dom.  |
| BM | HSgFOBT 55-75, 2 | 5958  | 0 | 0 | 1445 | 268 | 45 | 27 | -21.1% | Dom.  |
| BM | HSgFOBT 55-80, 2 | 6436  | 0 | 0 | 1519 | 274 | 47 | 28 | -21.7% | Dom.  |
| BM | HSgFOBT 55-85, 2 | 6882  | 0 | 0 | 1584 | 277 | 47 | 29 | -22.9% | Dom.  |
| BM | HSgFOBT 50-75, 2 | 7434  | 0 | 0 | 1709 | 317 | 52 | 30 | -14.3% | Dom.  |
| BM | HSgFOBT 50-80, 2 | 8143  | 0 | 0 | 1817 | 325 | 53 | 31 | -14.1% | Dom.  |
| BM | HSgFOBT 50-85, 2 | 8437  | 0 | 0 | 1859 | 327 | 53 | 32 | -14.3% | Dom.  |
| BM | HSgFOBT 45-75, 2 | 9278  | 0 | 0 | 1999 | 362 | 57 | 32 | -7.7%  | Dom.  |
| BM | HSgFOBT 45-80, 2 | 9747  | 0 | 0 | 2070 | 367 | 58 | 33 | -7.6%  | Dom.  |
| BM | HSgFOBT 45-85, 2 | 10187 | 0 | 0 | 2133 | 369 | 58 | 34 | -8.1%  | Dom.  |
| BM | HSgFOBT 55-75, 1 | 8863  | 0 | 0 | 1919 | 304 | 55 | 31 | -21.2% | Dom.  |
| BM | HSgFOBT 55-80, 1 | 9686  | 0 | 0 | 2027 | 309 | 57 | 32 | -21.6% | Dom.  |
| BM | HSgFOBT 55-85, 1 | 10192 | 0 | 0 | 2089 | 310 | 57 | 32 | -22.1% | Dom.  |
| BM | HSgFOBT 50-75, 1 | 11295 | 0 | 0 | 2301 | 359 | 62 | 34 | -12.7% | Dom.  |
| BM | HSgFOBT 50-80, 1 | 12116 | 0 | 0 | 2408 | 363 | 63 | 35 | -11.9% | Dom.  |

|    |                  |       |      |      |      |     |    |    |        |       |
|----|------------------|-------|------|------|------|-----|----|----|--------|-------|
| BM | HSgFOBT 50-85, 1 | 12619 | 0    | 0    | 2469 | 365 | 64 | 35 | -11.8% | Dom.  |
| BM | HSgFOBT 45-75, 1 | 13879 | 0    | 0    | 2660 | 403 | 67 | 36 | -3.2%  | Dom.  |
| BM | HSgFOBT 45-80, 1 | 14695 | 0    | 0    | 2766 | 407 | 68 | 37 | -2.5%  | Dom.  |
| BM | HSgFOBT 45-85, 1 | 15197 | 0    | 0    | 2826 | 409 | 69 | 37 | -2.4%  | Dom.  |
| BM | SIG 55-75, 10    | 0     | 1955 | 0    | 1478 | 276 | 55 | 28 | 0%     | 5.0   |
| BM | SIG 55-80, 10    | 0     | 1955 | 0    | 1478 | 276 | 55 | 28 | 0%     | 5.0   |
| BM | SIG 55-85, 10    | 0     | 2113 | 0    | 1538 | 277 | 55 | 29 | -8.1%  | Dom.  |
| BM | SIG 50-75, 10    | 0     | 2224 | 0    | 1608 | 317 | 58 | 30 | 0%     | 3.2   |
| BM | SIG 50-80, 10    | 0     | 2493 | 0    | 1718 | 322 | 60 | 31 | -4.0%  | Dom.  |
| BM | SIG 50-85, 10    | 0     | 2493 | 0    | 1718 | 322 | 60 | 31 | -4.0%  | Dom.  |
| BM | SIG 45-75, 10    | 0     | 2842 | 0    | 1855 | 358 | 63 | 33 | 0%     | 5.9   |
| BM | SIG 45-80, 10    | 0     | 2842 | 0    | 1855 | 358 | 63 | 33 | 0%     | 5.9   |
| BM | SIG 45-85, 10    | 0     | 2999 | 0    | 1914 | 360 | 64 | 33 | -0.7%  | 42.5* |
| BM | SIG 55-75, 5     | 0     | 2822 | 0    | 1751 | 295 | 59 | 30 | -13.3% | Dom.  |
| BM | SIG 55-80, 5     | 0     | 3035 | 0    | 1817 | 298 | 60 | 31 | -15.5% | Dom.  |
| BM | SIG 55-85, 5     | 0     | 3158 | 0    | 1852 | 298 | 61 | 31 | -16.7% | Dom.  |
| BM | SIG 50-75, 5     | 0     | 3550 | 0    | 2028 | 346 | 65 | 33 | -6.6%  | Dom.  |
| BM | SIG 50-80, 5     | 0     | 3761 | 0    | 2092 | 348 | 66 | 34 | -7.2%  | Dom.  |
| BM | SIG 50-85, 5     | 0     | 3883 | 0    | 2127 | 349 | 67 | 34 | -7.6%  | Dom.  |
| BM | SIG 45-75, 5     | 0     | 4321 | 0    | 2277 | 388 | 70 | 35 | 0%     | 14.4  |
| BM | SIG 45-80, 5     | 0     | 4531 | 0    | 2341 | 390 | 71 | 35 | 0%     | 30.7  |
| BM | SIG 45-85, 5     | 0     | 4653 | 0    | 2376 | 390 | 71 | 36 | 0%     | 73.0  |
| BM | CTC 55-75, 10    | 0     | 0    | 1937 | 1563 | 294 | 58 | 30 | 0%     | 5.0   |
| BM | CTC 55-80, 10    | 0     | 0    | 1937 | 1563 | 294 | 58 | 30 | 0%     | 5.0   |
| BM | CTC 55-85, 10    | 0     | 0    | 2088 | 1629 | 295 | 58 | 31 | -9.2%  | Dom.  |
| BM | CTC 50-75, 10    | 0     | 0    | 2209 | 1682 | 336 | 62 | 32 | 0%     | 2.8   |
| BM | CTC 50-80, 10    | 0     | 0    | 2469 | 1803 | 342 | 64 | 33 | -4.0%  | Dom.  |
| BM | CTC 50-85, 10    | 0     | 0    | 2469 | 1803 | 342 | 64 | 33 | -4.0%  | Dom.  |
| BM | CTC 45-75, 10    | 0     | 0    | 2823 | 1930 | 378 | 67 | 34 | 0%     | 6.0   |
| BM | CTC 45-80, 10    | 0     | 0    | 2823 | 1930 | 378 | 67 | 34 | 0%     | 6.0   |
| BM | CTC 45-85, 10    | 0     | 0    | 2973 | 1995 | 379 | 67 | 35 | -1.0%  | 45.6* |
| BM | CTC 55-75, 5     | 0     | 0    | 2787 | 1839 | 316 | 63 | 32 | -12.8% | Dom.  |
| BM | CTC 55-80, 5     | 0     | 0    | 2990 | 1907 | 319 | 64 | 33 | -14.8% | Dom.  |
| BM | CTC 55-85, 5     | 0     | 0    | 3106 | 1943 | 319 | 64 | 33 | -15.8% | Dom.  |
| BM | CTC 50-75, 5     | 0     | 0    | 3518 | 2110 | 370 | 69 | 35 | -5.9%  | Dom.  |
| BM | CTC 50-80, 5     | 0     | 0    | 3720 | 2177 | 372 | 70 | 36 | -6.7%  | Dom.  |
| BM | CTC 50-85, 5     | 0     | 0    | 3836 | 2213 | 372 | 70 | 36 | -7.2%  | Dom.  |
| BM | CTC 45-75, 5     | 0     | 0    | 4298 | 2348 | 412 | 73 | 37 | 0%     | 12.1  |
| BM | CTC 45-80, 5     | 0     | 0    | 4500 | 2415 | 415 | 74 | 38 | 0%     | 31.0  |
| BM | CTC 45-85, 5     | 0     | 0    | 4615 | 2451 | 415 | 75 | 38 | 0%     | 70.7  |

Abbreviations: BM = black male; COL = colonoscopy; CRC = colorectal cancer; CTC = computed tomographic colonography; Dom. = dominated strategy; ER = efficiency ratio; FIT = fecal immunochemical test; FIT-DNA = multitarget stool DNA test; HSgFOBT = high-sensitivity guaiac-based fecal occult blood test; LYG = life-years gained; SIG = flexible sigmoidoscopy.

<sup>a</sup> Both models evaluated two scenarios for CRC risk: one in which age-specific risks were assumed to have remained stable since the early screening period in the U.S. (1975-1979 for SimCRC; 1990-1994 for MISCAN), and one in which risks were assumed to have increased proportional to observed trends among adults under age 40 years. Strategies for each model and scenario are ordered successively by screening modality, interval (↓), end age (↑), and start age (↓).

<sup>b</sup> Total number of colonoscopies performed per 1000 40-year-olds, including diagnostic colonoscopies and potential surveillance colonoscopies after adenoma removal. The number of screening-related complications ranged from 4.2 to 18.6 per 1000 40-year-olds across models, scenarios, and strategies.

<sup>c</sup> Including deaths from complications of screening.

<sup>d</sup> The difference in LYG compared to (combinations of) adjacent strategies on the efficient frontier. Near-efficient strategies have a loss in LYG of less than 2% before rounding. For the least intensive screening strategy evaluated within each class of screening modality, the difference was zero by definition.

<sup>e</sup> Efficiency ratio = incremental number of colonoscopies/LYG with respect to the next less effective strategy on the efficient frontier, a burden-to-benefit ratio. Only calculated for efficient and near-efficient strategies (marked with an asterisk\*), i.e. strategies within 2% from the efficient frontier among all evaluated strategies within a class of screening modalities (colonoscopy, stool-based, sigmoidoscopy, and CTC).

**Supplementary Table 7. Outcomes for CRC Screening Strategies with Screening Between Similar Ages as the Selected Benchmark Colonoscopy Strategy, under Two Scenarios for CRC Risk, by Model and Demographic Subgroup <sup>a</sup>**

| Sub-group                                   | Modality, and age to begin-end screening, interval, y | Outcomes per 1000 40-year olds |      |      |      |     |                   |                                 | Relative distance from efficient frontier <sup>c</sup> | ER <sup>d</sup> | ER < benchmark <sup>e</sup> | LYG > 90% of benchmark | Model recommendable strategy <sup>f</sup> |
|---------------------------------------------|-------------------------------------------------------|--------------------------------|------|------|------|-----|-------------------|---------------------------------|--------------------------------------------------------|-----------------|-----------------------------|------------------------|-------------------------------------------|
|                                             |                                                       | Stool tests                    | SIGs | CTCs | COLs | LYG | CRC cases averted | CRC deaths averted <sup>b</sup> |                                                        |                 |                             |                        |                                           |
| <b>MISCAN - Scenario 1: Stable CRC risk</b> |                                                       |                                |      |      |      |     |                   |                                 |                                                        |                 |                             |                        |                                           |
| <b>WF</b>                                   | <b>Colonoscopy</b>                                    |                                |      |      |      |     |                   |                                 |                                                        |                 |                             |                        |                                           |
|                                             | COL 50-75, 10                                         | 0                              | 0    | 0.0  | 4067 | 192 | 36                | 17                              | 0%                                                     | 43.2            | -                           | -                      | Yes                                       |
|                                             | <b>Stool tests</b>                                    |                                |      |      |      |     |                   |                                 |                                                        |                 |                             |                        |                                           |
|                                             | FIT 50-75, 3                                          | 7173                           | 0    | 0    | 880  | 134 | 15                | 11                              | 0%                                                     | 6.1             | Yes                         | No                     |                                           |
|                                             | FIT 50-75, 2                                          | 9907                           | 0    | 0    | 1115 | 154 | 19                | 13                              | 0%                                                     | 11.9            | Yes                         | No                     |                                           |
|                                             | HSgFOBT 50-75, 3                                      | 6637                           | 0    | 0    | 1199 | 134 | 17                | 11                              | -15.1%                                                 | Dom.            | -                           | No                     |                                           |
|                                             | FIT-DNA 50-75, 5                                      | 4652                           | 0    | 0    | 1286 | 147 | 20                | 13                              | -9.3%                                                  | Dom.            | -                           | No                     |                                           |
|                                             | HSgFOBT 50-75, 2                                      | 8900                           | 0    | 0    | 1530 | 155 | 21                | 13                              | -11.5%                                                 | Dom.            | -                           | No                     |                                           |
|                                             | FIT-DNA 50-75, 3                                      | 6138                           | 0    | 0    | 1581 | 165 | 24                | 14                              | -6.9%                                                  | Dom.            | -                           | No                     |                                           |
|                                             | FIT 50-75, 1                                          | 16959                          | 0    | 0    | 1620 | 179 | 26                | 15                              | 0%                                                     | 19.8            | Yes                         | Yes                    | Yes                                       |
|                                             | HSgFOBT 50-75, 1                                      | 13803                          | 0    | 0    | 2179 | 180 | 28                | 15                              | -3.7%                                                  | Dom.            | -                           | Yes                    |                                           |
|                                             | FIT-DNA 50-75, 1                                      | 11871                          | 0    | 0    | 2548 | 191 | 33                | 16                              | 0%                                                     | 76.4            | No                          | Yes                    |                                           |
|                                             | <b>Sigmoidoscopy</b>                                  |                                |      |      |      |     |                   |                                 |                                                        |                 |                             |                        |                                           |
|                                             | SIG 50-75, 10                                         | 0                              | 2537 | 0    | 1534 | 137 | 26                | 12                              | 0%                                                     | 10.8            | Yes                         | No                     |                                           |
|                                             | SIG 50-75, 5                                          | 0                              | 4220 | 0    | 1978 | 158 | 30                | 14                              | 0%                                                     | 21.1            | Yes                         | No                     |                                           |
| <b>CT colonography</b>                      |                                                       |                                |      |      |      |     |                   |                                 |                                                        |                 |                             |                        |                                           |
| CTC 50-75, 10                               | 0                                                     | 0                              | 2614 | 1141 | 138  | 21  | 12                | 0%                              | 7.8                                                    | Yes             | No                          |                        |                                           |
| CTC 50-75, 5                                | 0                                                     | 0                              | 4466 | 1592 | 174  | 29  | 15                | 0%                              | 12.6                                                   | Yes             | Yes                         | Yes                    |                                           |
| <b>BF</b>                                   | <b>Colonoscopy</b>                                    |                                |      |      |      |     |                   |                                 |                                                        |                 |                             |                        |                                           |
|                                             | COL 45-75, 10                                         | 0                              | 0    | 0    | 4894 | 285 | 40                | 23                              | 0%                                                     | 43.4            | -                           | -                      | Yes                                       |
|                                             | <b>Stool tests</b>                                    |                                |      |      |      |     |                   |                                 |                                                        |                 |                             |                        |                                           |
|                                             | FIT 45-75, 3                                          | 8297                           | 0    | 0    | 1136 | 205 | 19                | 16                              | 0%                                                     | 5.2             | Yes                         | No                     |                                           |
|                                             | FIT 45-75, 2                                          | 11477                          | 0    | 0    | 1422 | 233 | 23                | 19                              | 0%                                                     | 10.2            | Yes                         | No                     |                                           |
|                                             | HSgFOBT 45-75, 3                                      | 7649                           | 0    | 0    | 1502 | 205 | 20                | 17                              | -14.0%                                                 | Dom.            | -                           | No                     |                                           |
|                                             | FIT-DNA 45-75, 5                                      | 5168                           | 0    | 0    | 1578 | 221 | 23                | 18                              | -8.8%                                                  | Dom.            | -                           | No                     |                                           |
|                                             | HSgFOBT 45-75, 2                                      | 10252                          | 0    | 0    | 1899 | 234 | 25                | 19                              | -10.4%                                                 | Dom.            | -                           | No                     |                                           |
| FIT-DNA 45-75, 3                            | 7012                                                  | 0                              | 0    | 1960 | 250  | 28  | 20                | -5.8%                           | Dom.                                                   | -               | No                          |                        |                                           |

|           |                        |       |      |      |      |     |    |    |        |      |     |     |     |
|-----------|------------------------|-------|------|------|------|-----|----|----|--------|------|-----|-----|-----|
|           | FIT 45-75, 1           | 19041 | 0    | 0    | 1988 | 267 | 30 | 21 | 0%     | 16.9 | Yes | Yes | Yes |
|           | HSgFOBT 45-75, 1       | 15400 | 0    | 0    | 2611 | 266 | 32 | 21 | -3.6%  | Dom. | -   | Yes |     |
|           | FIT-DNA 45-75, 1       | 13174 | 0    | 0    | 3023 | 283 | 37 | 23 | 0%     | 63.7 | No  | Yes |     |
|           | <b>Sigmoidoscopy</b>   |       |      |      |      |     |    |    |        |      |     |     |     |
|           | SIG 45-75, 10          | 0     | 3060 | 0    | 1905 | 208 | 30 | 18 | 0%     | 8.9  | Yes | No  |     |
|           | SIG 45-75, 5           | 0     | 4650 | 0    | 2333 | 235 | 33 | 20 | 0%     | 15.9 | Yes | No  |     |
|           | <b>CT colonography</b> |       |      |      |      |     |    |    |        |      |     |     |     |
|           | CTC 45-75, 10          | 0     | 0    | 3179 | 1490 | 215 | 26 | 18 | 0%     | 6.6  | Yes | No  |     |
|           | CTC 45-75, 5           | 0     | 0    | 4935 | 1937 | 260 | 33 | 21 | 0%     | 10.1 | Yes | Yes | Yes |
| <b>WM</b> | <b>Colonoscopy</b>     |       |      |      |      |     |    |    |        |      |     |     |     |
|           | COL 50-75, 10          | 0     | 0    | 0.0  | 4007 | 227 | 43 | 21 | 0%     | 38.6 | -   | -   | Yes |
|           | <b>Stool tests</b>     |       |      |      |      |     |    |    |        |      |     |     |     |
|           | FIT 50-75, 3           | 6689  | 0    | 0    | 947  | 162 | 18 | 15 | 0%     | 5.4  | Yes | No  |     |
|           | FIT 50-75, 2           | 9204  | 0    | 0    | 1188 | 185 | 23 | 17 | 0%     | 10.5 | Yes | No  |     |
|           | HSgFOBT 50-75, 3       | 6201  | 0    | 0    | 1248 | 161 | 20 | 15 | -14.3% | Dom. | -   | No  |     |
|           | FIT-DNA 50-75, 5       | 4308  | 0    | 0    | 1340 | 176 | 24 | 17 | -9.1%  | Dom. | -   | No  |     |
|           | HSgFOBT 50-75, 2       | 8279  | 0    | 0    | 1580 | 185 | 25 | 17 | -10.8% | Dom. | -   | No  |     |
|           | FIT-DNA 50-75, 3       | 5701  | 0    | 0    | 1650 | 198 | 29 | 18 | -6.5%  | Dom. | -   | No  |     |
|           | FIT 50-75, 1           | 15619 | 0    | 0    | 1693 | 214 | 32 | 20 | 0%     | 17.0 | Yes | Yes | Yes |
|           | HSgFOBT 50-75, 1       | 12737 | 0    | 0    | 2221 | 214 | 34 | 20 | -3.5%  | Dom. | -   | Yes |     |
|           | FIT-DNA 50-75, 1       | 10885 | 0    | 0    | 2589 | 227 | 40 | 21 | 0%     | 69.7 | No  | Yes |     |
|           | <b>Sigmoidoscopy</b>   |       |      |      |      |     |    |    |        |      |     |     |     |
|           | SIG 50-75, 10          | 0     | 2328 | 0    | 1822 | 183 | 35 | 18 | 0%     | 9.5  | Yes | No  |     |
|           | SIG 50-75, 5           | 0     | 3737 | 0    | 2231 | 203 | 39 | 20 | 0%     | 20.6 | Yes | No  |     |
|           | <b>CT colonography</b> |       |      |      |      |     |    |    |        |      |     |     |     |
|           | CTC 50-75, 10          | 0     | 0    | 2456 | 1223 | 166 | 26 | 15 | 0%     | 6.9  | Yes | No  |     |
|           | CTC 50-75, 5           | 0     | 0    | 4110 | 1667 | 207 | 35 | 19 | 0%     | 10.8 | Yes | Yes | Yes |
| <b>BM</b> | <b>Colonoscopy</b>     |       |      |      |      |     |    |    |        |      |     |     |     |
|           | COL 45-75, 10          | 0     | 0    | 0.0  | 4561 | 266 | 40 | 24 | 0%     | 42.9 | -   | -   | Yes |
|           | <b>Stool tests</b>     |       |      |      |      |     |    |    |        |      |     |     |     |
|           | FIT 45-75, 3           | 7675  | 0    | 0    | 1102 | 194 | 18 | 18 | 0%     | 5.4  | Yes | No  |     |
|           | FIT 45-75, 2           | 10595 | 0    | 0    | 1375 | 220 | 23 | 20 | 0%     | 10.5 | Yes | No  |     |
|           | HSgFOBT 45-75, 3       | 7092  | 0    | 0    | 1435 | 193 | 19 | 18 | -13.6% | Dom. | -   | No  |     |
|           | FIT-DNA 45-75, 5       | 4769  | 0    | 0    | 1507 | 207 | 22 | 19 | -8.9%  | Dom. | -   | No  |     |
|           | HSgFOBT 45-75, 2       | 9484  | 0    | 0    | 1811 | 220 | 24 | 20 | -10.2% | Dom. | -   | No  |     |
|           | FIT-DNA 45-75, 3       | 6482  | 0    | 0    | 1879 | 234 | 28 | 21 | -6.0%  | Dom. | -   | No  |     |
|           | FIT 45-75, 1           | 17548 | 0    | 0    | 1912 | 251 | 30 | 22 | 0%     | 17.0 | Yes | Yes | Yes |



|                        |                  |       |      |      |      |     |    |    |       |      |     |     |     |
|------------------------|------------------|-------|------|------|------|-----|----|----|-------|------|-----|-----|-----|
|                        | HSgFOBT 45-75, 1 | 14234 | 0    | 0    | 2485 | 251 | 31 | 22 | -3.5% | Dom. | -   | Yes |     |
|                        | FIT-DNA 45-75, 1 | 12136 | 0    | 0    | 2879 | 266 | 36 | 23 | 0%    | 67.4 | No  | Yes |     |
| <b>Sigmoidoscopy</b>   |                  |       |      |      |      |     |    |    |       |      |     |     |     |
|                        | SIG 45-75, 10    | 0     | 2778 | 0    | 1946 | 207 | 31 | 19 | 0%    | 9.1  | Yes | No  |     |
|                        | SIG 45-75, 5     | 0     | 4188 | 0    | 2343 | 230 | 34 | 21 | 0%    | 17.1 | Yes | No  |     |
| <b>CT colonography</b> |                  |       |      |      |      |     |    |    |       |      |     |     |     |
|                        | CTC 45-75, 10    | 0     | 0    | 2925 | 1434 | 201 | 26 | 19 | 0%    | 6.8  | Yes | No  |     |
|                        | CTC 45-75, 5     | 0     | 0    | 4538 | 1860 | 243 | 32 | 22 | 0%    | 10.0 | Yes | Yes | Yes |

**MISCAN - Scenario 2: Increased CRC risk**

|           |                        |       |      |      |      |     |    |    |        |      |     |     |     |
|-----------|------------------------|-------|------|------|------|-----|----|----|--------|------|-----|-----|-----|
| <b>WF</b> | <b>Colonoscopy</b>     |       |      |      |      |     |    |    |        |      |     |     |     |
|           | COL 45-75, 10          | 0     | 0    | 0.0  | 5823 | 398 | 74 | 35 | 0%     | 39.4 | -   | -   | Yes |
|           | <b>Stool tests</b>     |       |      |      |      |     |    |    |        |      |     |     |     |
|           | FIT 45-75, 3           | 8367  | 0    | 0    | 1583 | 281 | 32 | 24 | 0%     | 5.2  | Yes | No  |     |
|           | FIT 45-75, 2           | 11456 | 0    | 0    | 1964 | 322 | 41 | 27 | 0%     | 9.3  | Yes | No  |     |
|           | HSgFOBT 45-75, 3       | 7695  | 0    | 0    | 2019 | 283 | 36 | 24 | -13.2% | Dom. | -   | No  |     |
|           | FIT-DNA 45-75, 5       | 5161  | 0    | 0    | 2145 | 303 | 41 | 26 | -9.3%  | Dom. | -   | No  |     |
|           | HSgFOBT 45-75, 2       | 10188 | 0    | 0    | 2526 | 325 | 45 | 28 | -9.7%  | Dom. | -   | No  |     |
|           | FIT-DNA 45-75, 3       | 6941  | 0    | 0    | 2633 | 345 | 50 | 29 | -6.2%  | Dom. | -   | No  |     |
|           | FIT 45-75, 1           | 18692 | 0    | 0    | 2690 | 371 | 54 | 31 | 0%     | 14.7 | Yes | Yes | Yes |
|           | HSgFOBT 45-75, 1       | 15026 | 0    | 0    | 3402 | 372 | 58 | 31 | -3.4%  | Dom. | -   | Yes |     |
|           | FIT-DNA 45-75, 1       | 12627 | 0    | 0    | 3902 | 395 | 66 | 33 | 0%     | 50.6 | No  | Yes |     |
|           | <b>Sigmoidoscopy</b>   |       |      |      |      |     |    |    |        |      |     |     |     |
|           | SIG 45-75, 10          | 0     | 2795 | 0    | 3466 | 350 | 65 | 31 | 0%     | 9.6  | Yes | No  |     |
|           | SIG 45-75, 5           | 0     | 4005 | 0    | 3930 | 379 | 70 | 33 | 0%     | 16.1 | Yes | Yes | Yes |
|           | <b>CT colonography</b> |       |      |      |      |     |    |    |        |      |     |     |     |
|           | CTC 45-75, 10          | 0     | 0    | 3178 | 2074 | 291 | 46 | 26 | 0%     | 6.7  | Yes | No  |     |
|           | CTC 45-75, 5           | 0     | 0    | 4853 | 2652 | 358 | 58 | 31 | 0%     | 8.6  | Yes | Yes | Yes |
| <b>BF</b> | <b>Colonoscopy</b>     |       |      |      |      |     |    |    |        |      |     |     |     |
|           | COL 45-75, 10          | 0     | 0    | 0    | 5231 | 366 | 52 | 30 | 0%     | 33.2 | -   | -   | Yes |
|           | <b>Stool tests</b>     |       |      |      |      |     |    |    |        |      |     |     |     |
|           | FIT 45-75, 3           | 8114  | 0    | 0    | 1363 | 261 | 24 | 21 | 0%     | 4.9  | Yes | No  |     |
|           | FIT 45-75, 2           | 11148 | 0    | 0    | 1691 | 297 | 30 | 24 | 0%     | 9.1  | Yes | No  |     |
|           | HSgFOBT 45-75, 3       | 7479  | 0    | 0    | 1745 | 261 | 26 | 21 | -13.2% | Dom. | -   | No  |     |
|           | FIT-DNA 45-75, 5       | 5024  | 0    | 0    | 1853 | 282 | 30 | 23 | -8.8%  | Dom. | -   | No  |     |
|           | HSgFOBT 45-75, 2       | 9948  | 0    | 0    | 2185 | 300 | 32 | 24 | -9.7%  | Dom. | -   | No  |     |
|           | FIT-DNA 45-75, 3       | 6780  | 0    | 0    | 2278 | 319 | 37 | 26 | -5.6%  | Dom. | -   | No  |     |
|           | FIT 45-75, 1           | 18305 | 0    | 0    | 2319 | 341 | 39 | 27 | 0%     | 14.4 | Yes | Yes | Yes |

|           |                        |       |      |      |      |     |     |    |        |      |     |     |     |
|-----------|------------------------|-------|------|------|------|-----|-----|----|--------|------|-----|-----|-----|
|           | HSgFOBT 45-75, 1       | 14780 | 0    | 0    | 2957 | 342 | 41  | 28 | -3.5%  | Dom. | -   | Yes |     |
|           | FIT-DNA 45-75, 1       | 12503 | 0    | 0    | 3403 | 363 | 48  | 29 | 0%     | 49.4 | No  | Yes |     |
|           | <b>Sigmoidoscopy</b>   |       |      |      |      |     |     |    |        |      |     |     |     |
|           | SIG 45-75, 10          | 0     | 2812 | 0    | 2743 | 314 | 45  | 26 | 0%     | 8.5  | Yes | No  |     |
|           | SIG 45-75, 5           | 0     | 4134 | 0    | 3161 | 340 | 48  | 28 | 0%     | 16.0 | Yes | Yes | Yes |
|           | <b>CT colonography</b> |       |      |      |      |     |     |    |        |      |     |     |     |
|           | CTC 45-75, 10          | 0     | 0    | 3090 | 1786 | 274 | 34  | 23 | 0%     | 6.2  | Yes | No  |     |
|           | CTC 45-75, 5           | 0     | 0    | 4748 | 2284 | 333 | 42  | 27 | 0%     | 8.5  | Yes | Yes | Yes |
| <b>WM</b> | <b>Colonoscopy</b>     |       |      |      |      |     |     |    |        |      |     |     |     |
|           | COL 45-75, 5           | 0     | 0    | 0.0  | 7182 | 554 | 102 | 51 | 0%     | 39.5 | -   | -   | Yes |
|           | <b>Stool tests</b>     |       |      |      |      |     |     |    |        |      |     |     |     |
|           | FIT 45-75, 3           | 7643  | 0    | 0    | 1853 | 378 | 45  | 35 | 0%     | 4.5  | Yes | No  |     |
|           | FIT 45-75, 2           | 10343 | 0    | 0    | 2270 | 431 | 48  | 35 | 0%     | 7.8  | Yes | No  |     |
|           | HSgFOBT 45-75, 3       | 7045  | 0    | 0    | 2260 | 379 | 56  | 39 | -11.9% | Dom. | -   | No  |     |
|           | FIT-DNA 45-75, 5       | 4674  | 0    | 0    | 2413 | 405 | 56  | 38 | -8.7%  | Dom. | -   | No  |     |
|           | HSgFOBT 45-75, 2       | 9211  | 0    | 0    | 2792 | 434 | 60  | 40 | -8.6%  | Dom. | -   | No  |     |
|           | FIT-DNA 45-75, 3       | 6240  | 0    | 0    | 2951 | 460 | 68  | 42 | -5.8%  | Dom. | -   | No  |     |
|           | FIT 45-75, 1           | 16592 | 0    | 0    | 3033 | 495 | 74  | 45 | 0%     | 12.0 | Yes | No  |     |
|           | HSgFOBT 45-75, 1       | 13359 | 0    | 0    | 3692 | 495 | 78  | 45 | -2.9%  | Dom. | -   | No  |     |
|           | FIT-DNA 45-75, 1       | 11006 | 0    | 0    | 4210 | 522 | 89  | 47 | 0%     | 43.8 | No  | Yes |     |
|           | <b>Sigmoidoscopy</b>   |       |      |      |      |     |     |    |        |      |     |     |     |
|           | SIG 45-75, 10          | 0     | 2451 | 0    | 3825 | 457 | 85  | 44 | 0%     | 8.0  | Yes | No  |     |
|           | SIG 45-75, 5           | 0     | 3389 | 0    | 4302 | 494 | 91  | 46 | 0%     | 12.8 | Yes | No  |     |
|           | <b>CT colonography</b> |       |      |      |      |     |     |    |        |      |     |     |     |
|           | CTC 45-75, 10          | 0     | 0    | 2875 | 2385 | 386 | 62  | 37 | 0%     | 5.8  | Yes | No  |     |
|           | CTC 45-75, 5           | 0     | 0    | 4315 | 2999 | 474 | 78  | 44 | 0%     | 7.0  | Yes | No  |     |
| <b>BM</b> | <b>Colonoscopy</b>     |       |      |      |      |     |     |    |        |      |     |     |     |
|           | COL 45-75, 10          | 0     | 0    | 0.0  | 5010 | 375 | 57  | 34 | 0%     | 30.1 | -   | -   | Yes |
|           | <b>Stool tests</b>     |       |      |      |      |     |     |    |        |      |     |     |     |
|           | FIT 45-75, 3           | 7395  | 0    | 0    | 1428 | 267 | 26  | 25 | 0%     | 5.0  | Yes | No  |     |
|           | FIT 45-75, 2           | 10094 | 0    | 0    | 1758 | 305 | 33  | 28 | 0%     | 8.6  | Yes | No  |     |
|           | HSgFOBT 45-75, 3       | 6836  | 0    | 0    | 1775 | 267 | 28  | 25 | -12.9% | Dom. | -   | No  |     |
|           | FIT-DNA 45-75, 5       | 4555  | 0    | 0    | 1892 | 287 | 33  | 27 | -8.8%  | Dom. | -   | No  |     |
|           | HSgFOBT 45-75, 2       | 9028  | 0    | 0    | 2209 | 307 | 35  | 28 | -9.4%  | Dom. | -   | No  |     |
|           | FIT-DNA 45-75, 3       | 6134  | 0    | 0    | 2327 | 327 | 40  | 30 | -5.9%  | Dom. | -   | No  |     |
|           | FIT 45-75, 1           | 16433 | 0    | 0    | 2380 | 351 | 44  | 31 | 0%     | 13.6 | Yes | Yes | Yes |
|           | HSgFOBT 45-75, 1       | 13309 | 0    | 0    | 2965 | 351 | 46  | 32 | -3.5%  | Dom. | -   | Yes |     |

|  |                        |       |      |      |      |     |    |    |    |      |     |     |     |
|--|------------------------|-------|------|------|------|-----|----|----|----|------|-----|-----|-----|
|  | FIT-DNA 45-75, 1       | 11132 | 0    | 0    | 3406 | 374 | 53 | 34 | 0% | 45.2 | No  | Yes |     |
|  | <b>Sigmoidoscopy</b>   |       |      |      |      |     |    |    |    |      |     |     |     |
|  | SIG 45-75, 10          | 0     | 2479 | 0    | 2915 | 328 | 50 | 31 | 0% | 8.6  | Yes | No  |     |
|  | SIG 45-75, 5           | 0     | 3565 | 0    | 3309 | 354 | 54 | 32 | 0% | 15.4 | Yes | Yes | Yes |
|  | <b>CT colonography</b> |       |      |      |      |     |    |    |    |      |     |     |     |
|  | CTC 45-75, 10          | 0     | 0    | 2794 | 1856 | 281 | 37 | 26 | 0% | 6.3  | Yes | No  |     |
|  | CTC 45-75, 5           | 0     | 0    | 4258 | 2351 | 341 | 47 | 31 | 0% | 8.2  | Yes | Yes | Yes |

**SimCRC - Scenario 1: Stable CRC risk**

|           |                        |       |      |      |      |     |    |    |        |         |     |     |     |
|-----------|------------------------|-------|------|------|------|-----|----|----|--------|---------|-----|-----|-----|
| <b>WF</b> | <b>Colonoscopy</b>     |       |      |      |      |     |    |    |        |         |     |     |     |
|           | COL 45-75, 15          | 0     | 0    | 0.0  | 4062 | 283 | 55 | 23 | 0%     | 31.6    | -   | -   | Yes |
|           | <b>Stool tests</b>     |       |      |      |      |     |    |    |        |         |     |     |     |
|           | FIT 45-75, 3           | 8777  | 0    | 0    | 1046 | 232 | 31 | 18 | 0%     | 4.2     | Yes | No  |     |
|           | FIT 45-75, 2           | 12158 | 0    | 0    | 1333 | 257 | 38 | 20 | 0%     | 11.6    | Yes | Yes |     |
|           | HSgFOBT 45-75, 3       | 8097  | 0    | 0    | 1434 | 233 | 33 | 18 | -10.8% | Dom.    | -   | No  |     |
|           | FIT-DNA 45-75, 5       | 5489  | 0    | 0    | 1486 | 243 | 37 | 19 | -7.6%  | Dom.    | -   | No  |     |
|           | HSgFOBT 45-75, 2       | 10852 | 0    | 0    | 1824 | 258 | 40 | 20 | -6.9%  | Dom.    | -   | Yes |     |
|           | FIT-DNA 45-75, 3       | 7510  | 0    | 0    | 1869 | 269 | 44 | 21 | -3.7%  | Dom.    | -   | Yes |     |
|           | FIT 45-75, 1           | 20234 | 0    | 0    | 1911 | 281 | 47 | 22 | 0%     | 23.9    | Yes | Yes | Yes |
|           | HSgFOBT 45-75, 1       | 16396 | 0    | 0    | 2530 | 282 | 49 | 22 | -1.9%  | 1034.5* | No  | Yes |     |
|           | FIT-DNA 45-75, 1       | 14124 | 0    | 0    | 2946 | 291 | 53 | 23 | 0%     | 100.7   | No  | Yes |     |
|           | <b>Sigmoidoscopy</b>   |       |      |      |      |     |    |    |        |         |     |     |     |
|           | SIG 45-75, 10          | 0     | 3359 | 0    | 1510 | 214 | 41 | 17 | 0%     | 6.7     | Yes | No  |     |
|           | SIG 45-75, 5           | 0     | 5179 | 0    | 1973 | 240 | 46 | 20 | 0%     | 17.8    | Yes | No  |     |
|           | <b>CT colonography</b> |       |      |      |      |     |    |    |        |         |     |     |     |
|           | CTC 45-75, 10          | 0     | 0    | 3336 | 1608 | 261 | 48 | 21 | 0%     | 5.9     | Yes | Yes |     |
|           | CTC 45-75, 5           | 0     | 0    | 5163 | 2045 | 284 | 53 | 23 | 0%     | 19.0    | Yes | Yes | Yes |
| <b>BF</b> | <b>Colonoscopy</b>     |       |      |      |      |     |    |    |        |         |     |     |     |
|           | COL 45-75, 15          | 0     | 0    | 0    | 3845 | 317 | 53 | 26 | 0%     | 24.4    | -   | -   | Yes |
|           | <b>Stool tests</b>     |       |      |      |      |     |    |    |        |         |     |     |     |
|           | FIT 45-75, 3           | 8461  | 0    | 0    | 978  | 241 | 30 | 19 | 0%     | 3.8     | Yes | No  |     |
|           | FIT 45-75, 2           | 11722 | 0    | 0    | 1249 | 274 | 36 | 22 | 0%     | 8.1     | Yes | No  |     |
|           | HSgFOBT 45-75, 3       | 7815  | 0    | 0    | 1349 | 243 | 32 | 19 | -13.5% | Dom.    | -   | No  |     |
|           | FIT-DNA 45-75, 5       | 5288  | 0    | 0    | 1392 | 255 | 36 | 21 | -10.1% | Dom.    | -   | No  |     |
|           | HSgFOBT 45-75, 2       | 10472 | 0    | 0    | 1717 | 277 | 38 | 22 | -9.4%  | Dom.    | -   | No  |     |
|           | FIT-DNA 45-75, 3       | 7257  | 0    | 0    | 1759 | 292 | 42 | 23 | -5.4%  | Dom.    | -   | Yes |     |
|           | FIT 45-75, 1           | 19536 | 0    | 0    | 1797 | 311 | 45 | 25 | 0%     | 14.9    | Yes | Yes | Yes |
|           | HSgFOBT 45-75, 1       | 15850 | 0    | 0    | 2391 | 312 | 47 | 25 | -2.7%  | Dom.    | -   | Yes |     |

|           |                        |       |      |      |      |     |    |    |        |         |     |     |     |
|-----------|------------------------|-------|------|------|------|-----|----|----|--------|---------|-----|-----|-----|
|           | FIT-DNA 45-75, 1       | 13664 | 0    | 0    | 2789 | 327 | 52 | 26 | 0%     | 63.3    | No  | Yes |     |
|           | <b>Sigmoidoscopy</b>   |       |      |      |      |     |    |    |        |         |     |     |     |
|           | SIG 45-75, 10          | 0     | 3231 | 0    | 1412 | 230 | 38 | 19 | 0%     | 5.9     | Yes | No  |     |
|           | SIG 45-75, 5           | 0     | 4992 | 0    | 1852 | 261 | 44 | 22 | 0%     | 14.2    | Yes | No  |     |
|           | <b>CT colonography</b> |       |      |      |      |     |    |    |        |         |     |     |     |
|           | CTC 45-75, 10          | 0     | 0    | 3211 | 1499 | 288 | 46 | 24 | 0%     | 5.0     | Yes | Yes |     |
|           | CTC 45-75, 5           | 0     | 0    | 4980 | 1916 | 317 | 52 | 26 | 0%     | 14.3    | Yes | Yes | Yes |
| <b>WM</b> | <b>Colonoscopy</b>     |       |      |      |      |     |    |    |        |         |     |     |     |
|           | COL 45-75, 15          | 0     | 0    | 0.0  | 4098 | 307 | 64 | 27 | 0%     | 28.0    | -   | -   | Yes |
|           | <b>Stool tests</b>     |       |      |      |      |     |    |    |        |         |     |     |     |
|           | FIT 45-75, 3           | 8194  | 0    | 0    | 1213 | 256 | 40 | 22 | 0%     | 4.4     | Yes | No  |     |
|           | FIT 45-75, 2           | 11274 | 0    | 0    | 1522 | 283 | 47 | 24 | 0%     | 11.5    | Yes | Yes |     |
|           | HSgFOBT 45-75, 3       | 7576  | 0    | 0    | 1578 | 256 | 42 | 22 | -10.2% | Dom.    | -   | No  |     |
|           | FIT-DNA 45-75, 5       | 5102  | 0    | 0    | 1652 | 268 | 46 | 23 | -7.2%  | Dom.    | -   | No  |     |
|           | HSgFOBT 45-75, 2       | 10082 | 0    | 0    | 1979 | 283 | 49 | 25 | -6.2%  | Dom.    | -   | Yes |     |
|           | FIT-DNA 45-75, 3       | 6966  | 0    | 0    | 2056 | 296 | 53 | 26 | -3.2%  | Dom.    | -   | Yes |     |
|           | FIT 45-75, 1           | 18598 | 0    | 0    | 2119 | 308 | 57 | 27 | 0%     | 23.8    | Yes | Yes | Yes |
|           | HSgFOBT 45-75, 1       | 15127 | 0    | 0    | 2689 | 308 | 58 | 27 | -1.8%  | 8070.7* | No  | Yes |     |
|           | FIT-DNA 45-75, 1       | 12911 | 0    | 0    | 3114 | 318 | 64 | 28 | 0%     | 99.4    | No  | Yes |     |
|           | <b>Sigmoidoscopy</b>   |       |      |      |      |     |    |    |        |         |     |     |     |
|           | SIG 45-75, 10          | 0     | 3112 | 0    | 1711 | 248 | 51 | 22 | 0%     | 6.6     | Yes | No  |     |
|           | SIG 45-75, 5           | 0     | 4760 | 0    | 2185 | 275 | 58 | 25 | 0%     | 17.7    | Yes | No  |     |
|           | <b>CT colonography</b> |       |      |      |      |     |    |    |        |         |     |     |     |
|           | CTC 45-75, 10          | 0     | 0    | 3077 | 1854 | 287 | 58 | 26 | 0%     | 6.2     | Yes | Yes |     |
|           | CTC 45-75, 5           | 0     | 0    | 4713 | 2303 | 312 | 64 | 27 | 0%     | 18.2    | Yes | Yes | Yes |
| <b>BM</b> | <b>Colonoscopy</b>     |       |      |      |      |     |    |    |        |         |     |     |     |
|           | COL 45-75, 15          | 0     | 0    | 0.0  | 3748 | 248 | 48 | 23 | 0%     | 27.7    | -   | -   | Yes |
|           | <b>Stool tests</b>     |       |      |      |      |     |    |    |        |         |     |     |     |
|           | FIT 45-75, 3           | 7763  | 0    | 0    | 1085 | 195 | 29 | 18 | 0%     | 5.3     | Yes | No  |     |
|           | FIT 45-75, 2           | 10684 | 0    | 0    | 1366 | 219 | 35 | 20 | 0%     | 11.4    | Yes | No  |     |
|           | HSgFOBT 45-75, 3       | 7191  | 0    | 0    | 1423 | 195 | 31 | 18 | -12.1% | Dom.    | -   | No  |     |
|           | FIT-DNA 45-75, 5       | 4828  | 0    | 0    | 1483 | 205 | 34 | 19 | -8.9%  | Dom.    | -   | No  |     |
|           | HSgFOBT 45-75, 2       | 9567  | 0    | 0    | 1791 | 220 | 36 | 21 | -8.4%  | Dom.    | -   | No  |     |
|           | FIT-DNA 45-75, 3       | 6624  | 0    | 0    | 1860 | 232 | 40 | 21 | -4.8%  | Dom.    | -   | Yes |     |
|           | FIT 45-75, 1           | 17665 | 0    | 0    | 1914 | 247 | 43 | 23 | 0%     | 20.0    | Yes | Yes | Yes |
|           | HSgFOBT 45-75, 1       | 14396 | 0    | 0    | 2448 | 247 | 44 | 23 | -2.4%  | Dom.    | -   | Yes |     |
|           | FIT-DNA 45-75, 1       | 12303 | 0    | 0    | 2843 | 258 | 48 | 24 | 0%     | 84.2    | No  | Yes |     |

**Sigmoidoscopy**

|                        |   |      |      |      |     |    |    |    |      |     |     |     |
|------------------------|---|------|------|------|-----|----|----|----|------|-----|-----|-----|
| SIG 45-75, 10          | 0 | 2938 | 0    | 1530 | 194 | 37 | 19 | 0% | 7.6  | Yes | No  |     |
| SIG 45-75, 5           | 0 | 4511 | 0    | 1966 | 217 | 42 | 21 | 0% | 18.8 | Yes | No  |     |
| <b>CT colonography</b> |   |      |      |      |     |    |    |    |      |     |     |     |
| CTC 45-75, 10          | 0 | 0    | 2907 | 1655 | 229 | 43 | 22 | 0% | 7.0  | Yes | Yes |     |
| CTC 45-75, 5           | 0 | 0    | 4469 | 2069 | 251 | 48 | 23 | 0% | 19.0 | Yes | Yes | Yes |

**SimCRC - Scenario 2: Increased CRC risk****WF****Colonoscopy**

|               |   |   |     |      |     |    |    |    |      |   |   |     |
|---------------|---|---|-----|------|-----|----|----|----|------|---|---|-----|
| COL 45-75, 10 | 0 | 0 | 0.0 | 5138 | 473 | 99 | 41 | 0% | 29.4 | - | - | Yes |
|---------------|---|---|-----|------|-----|----|----|----|------|---|---|-----|

**Stool tests**

|                  |       |   |   |      |     |    |    |        |      |     |     |     |
|------------------|-------|---|---|------|-----|----|----|--------|------|-----|-----|-----|
| FIT 45-75, 3     | 8732  | 0 | 0 | 1155 | 348 | 48 | 28 | 0%     | 3.0  | Yes | No  |     |
| FIT 45-75, 2     | 12090 | 0 | 0 | 1459 | 393 | 59 | 32 | 0%     | 6.8  | Yes | No  |     |
| HSgFOBT 45-75, 3 | 8066  | 0 | 0 | 1539 | 350 | 52 | 28 | -12.3% | Dom. | -   | No  |     |
| FIT-DNA 45-75, 5 | 5466  | 0 | 0 | 1607 | 368 | 59 | 30 | -8.9%  | Dom. | -   | No  |     |
| HSgFOBT 45-75, 2 | 10808 | 0 | 0 | 1945 | 396 | 63 | 32 | -7.9%  | Dom. | -   | No  |     |
| FIT-DNA 45-75, 3 | 7484  | 0 | 0 | 2003 | 414 | 70 | 34 | -4.7%  | Dom. | -   | No  |     |
| FIT 45-75, 1     | 20115 | 0 | 0 | 2064 | 439 | 76 | 36 | 0%     | 13.3 | Yes | Yes | Yes |
| HSgFOBT 45-75, 1 | 16337 | 0 | 0 | 2676 | 440 | 79 | 36 | -2.4%  | Dom. | -   | Yes |     |
| FIT-DNA 45-75, 1 | 14057 | 0 | 0 | 3120 | 460 | 88 | 38 | 0%     | 49.4 | No  | Yes |     |

**Sigmoidoscopy**

|               |   |      |   |      |     |    |    |    |      |     |     |     |
|---------------|---|------|---|------|-----|----|----|----|------|-----|-----|-----|
| SIG 45-75, 10 | 0 | 3257 | 0 | 2103 | 416 | 85 | 36 | 0% | 4.8  | Yes | No  |     |
| SIG 45-75, 5  | 0 | 4937 | 0 | 2567 | 446 | 92 | 38 | 0% | 15.5 | Yes | Yes | Yes |

**CT colonography**

|               |   |   |      |      |     |    |    |    |      |     |     |     |
|---------------|---|---|------|------|-----|----|----|----|------|-----|-----|-----|
| CTC 45-75, 10 | 0 | 0 | 3325 | 1780 | 405 | 79 | 35 | 0% | 4.1  | Yes | No  |     |
| CTC 45-75, 5  | 0 | 0 | 5134 | 2248 | 449 | 89 | 38 | 0% | 10.4 | Yes | Yes | Yes |

**BF****Colonoscopy**

|               |   |   |   |      |     |    |    |    |      |   |   |     |
|---------------|---|---|---|------|-----|----|----|----|------|---|---|-----|
| COL 45-75, 10 | 0 | 0 | 0 | 4623 | 416 | 67 | 33 | 0% | 34.8 | - | - | Yes |
|---------------|---|---|---|------|-----|----|----|----|------|---|---|-----|

**Stool tests**

|                  |       |   |   |      |     |    |    |        |      |     |     |     |
|------------------|-------|---|---|------|-----|----|----|--------|------|-----|-----|-----|
| FIT 45-75, 3     | 8465  | 0 | 0 | 949  | 294 | 34 | 23 | 0%     | 3.0  | Yes | No  |     |
| FIT 45-75, 2     | 11747 | 0 | 0 | 1207 | 336 | 42 | 26 | 0%     | 6.1  | Yes | No  |     |
| HSgFOBT 45-75, 3 | 7822  | 0 | 0 | 1311 | 297 | 37 | 23 | -14.0% | Dom. | -   | No  |     |
| FIT-DNA 45-75, 5 | 5301  | 0 | 0 | 1347 | 312 | 41 | 25 | -10.6% | Dom. | -   | No  |     |
| HSgFOBT 45-75, 2 | 10500 | 0 | 0 | 1666 | 340 | 44 | 27 | -10.1% | Dom. | -   | No  |     |
| FIT-DNA 45-75, 3 | 7288  | 0 | 0 | 1700 | 359 | 49 | 28 | -5.8%  | Dom. | -   | No  |     |
| FIT 45-75, 1     | 19641 | 0 | 0 | 1735 | 384 | 53 | 30 | 0%     | 10.9 | Yes | Yes | Yes |
| HSgFOBT 45-75, 1 | 15942 | 0 | 0 | 2322 | 386 | 55 | 30 | -2.9%  | Dom. | -   | Yes |     |
| FIT-DNA 45-75, 1 | 13792 | 0 | 0 | 2709 | 406 | 61 | 32 | 0%     | 45.6 | No  | Yes |     |



|                        |   |      |      |      |     |    |    |    |      |     |     |     |
|------------------------|---|------|------|------|-----|----|----|----|------|-----|-----|-----|
| SIG 45-75, 10          | 0 | 2842 | 0    | 1855 | 358 | 63 | 33 | 0% | 4.9  | Yes | No  |     |
| SIG 45-75, 5           | 0 | 4321 | 0    | 2277 | 388 | 70 | 35 | 0% | 14.4 | Yes | Yes | Yes |
| <b>CT colonography</b> |   |      |      |      |     |    |    |    |      |     |     |     |
| CTC 45-75, 10          | 0 | 0    | 2823 | 1930 | 378 | 67 | 34 | 0% | 4.9  | Yes | No  |     |
| CTC 45-75, 5           | 0 | 0    | 4298 | 2348 | 412 | 73 | 37 | 0% | 12.1 | Yes | Yes | Yes |

Abbreviations: BF = black female; BM = black male; COL = colonoscopy; CRC = colorectal cancer; CTC = computed tomographic colonography; Dom. = dominated strategy; ER = efficiency ratio (incremental burden-to-benefit ratio); FIT = fecal immunochemical test; FIT-DNA = multitarget stool DNA test; HSgFOBT = high-sensitivity guaiac-based fecal occult blood test; LYG = life-years gained; SIG = flexible sigmoidoscopy; WF = white female; WM = white male.

<sup>a</sup> Both models evaluated two scenarios for CRC risk: one in which age-specific risks were assumed to have remained stable since the early screening period in the U.S. (1975-1979 for SimCRC; 1990-1994 for MISCAN), and one in which age-specific risks were assumed to have increased proportional to observed trends among adults under age 40 years.

<sup>b</sup> Including deaths from complications of screening.

<sup>c</sup> The difference in LYG compared to a combination of efficient strategies with similar number of required colonoscopies; measure of inefficiency. Values for strategies other than colonoscopy screening differ from those in Supplementary Table 3-6, as efficiency was reassessed including only strategies with similar start and stop ages as the benchmark (model-recommendable) colonoscopy strategy.

<sup>d</sup> Efficiency ratio = incremental number of colonoscopies/LYG compared to the next less effective strategy on the efficient frontier; an incremental burden-to-benefit ratio. Values for strategies other than colonoscopy screening differ from those in Supplementary Table 3-6, as efficiency was reassessed including only efficient and near-efficient\* options among the strategies with similar start and stop ages as the benchmark (model-recommendable) colonoscopy strategy.

<sup>e</sup> Efficient or near-efficient strategy with an efficiency ratio lower than the benchmark (model-recommendable) colonoscopy strategy.

<sup>f</sup> Efficient or near-efficient strategy with a lower burden-to-benefit ratio and at least 90% of the LYG compared to the benchmark (model-recommendable) colonoscopy strategy.

**Supplementary Table 8. Model-Recommendable Strategies under Two Scenarios of CRC Risk, with Best-Case Test Performance Assumptions <sup>a</sup>**

| Model  | Test class | Scenario 1: Stable CRC risk <sup>b</sup> |               |                     |              | Scenario 2: Increased CRC risk <sup>c</sup> |               |                     |              |
|--------|------------|------------------------------------------|---------------|---------------------|--------------|---------------------------------------------|---------------|---------------------|--------------|
|        |            | White females                            | Black females | White males         | Black males  | White females                               | Black females | White males         | Black males  |
| MISCAN | COL        | 50-75, 10                                | 45-75, 10     | 50-75, 10           | 45-75, 10    | 45-75, 10                                   | 45-75, 10     | 45-75, 5            | 45-75, 10    |
|        | Stool      | FIT 50-75, 1                             | FIT 45-75, 1  | FIT 50-75, 1        | FIT 45-75, 1 | FIT 45-75, 1                                | FIT 45-75, 1  | <b>FIT 45-75, 1</b> | FIT 45-75, 1 |
|        | SIG        | -                                        | -             | <b>50-75, 5</b>     | -            | <b>X</b>                                    | <b>X</b>      | -                   | <b>X</b>     |
|        | CTC        | 50-75, 5                                 | 45-75, 5      | 50-75, 5            | 45-75, 5     | 45-75, 5                                    | 45-75, 5      | -                   | 45-75, 5     |
| SimCRC | COL        | 45-75, 15                                | 45-75, 15     | 45-75, 15           | 45-75, 15    | 45-75, 10                                   | 45-75, 10     | 45-75, 10           | 45-75, 10    |
|        | Stool      | FIT 45-75, 1                             | FIT 45-75, 1  | <b>FIT 45-75, 2</b> | FIT 45-75, 1 | FIT 45-75, 1                                | FIT 45-75, 1  | FIT 45-75, 1        | FIT 45-75, 1 |
|        | SIG        | -                                        | -             | <b>45-75, 5</b>     | -            | 45-75, 5                                    | 45-75, 5      | 45-75, 5            | 45-75, 5     |
|        | CTC        | 45-75, 5                                 | 45-75, 5      | 45-75, 5            | 45-75, 5     | 45-75, 5                                    | 45-75, 5      | 45-75, 5            | 45-75, 5     |

Abbreviations: - = no model-recommendable strategy within this class; COL = colonoscopy; CRC = colorectal cancer; CTC = computed tomographic colonography; FIT = fecal immunochemical test; SIG = flexible sigmoidoscopy; X = class of screening modality was no longer recommended in the sensitivity analysis.

<sup>a</sup> Numbers in each field of the table successively represent recommended age to start screening, age to stop, and interval, all in years. For the class of stool-based screening modalities, the model-recommendable modality is also included, i.e. FIT. Changes from the base-case are designated in bold-faced letters. Best-case test performance assumptions are provided in Table 1.

<sup>b</sup> Risk within each age-, race-, and sex-specific demographic subgroup was assumed to have remained stable over time since the early screening period in the U.S (1975-1979 for SimCRC; 1990-1994 for MISCAN).

<sup>c</sup> CRC risk was increased proportional to observed trends in CRC incidence among adults under 40 years old. Estimated incidence rate ratios were 1.80-1.90 for white females (range across models), 1.24-1.27 for black females, 2.07-2.13 for white males, and 1.41-1.56 for black males.



**Supplementary Table 9. Model-Recommendable Strategies under Two Scenarios of CRC Risk, with Worst-Case Test Performance Assumptions <sup>a</sup>**

| Model         | Test class | Scenario 1: Stable CRC risk <sup>b</sup> |                  |                  |              | Scenario 2: Increased CRC risk <sup>c</sup> |                        |                        |             |
|---------------|------------|------------------------------------------|------------------|------------------|--------------|---------------------------------------------|------------------------|------------------------|-------------|
|               |            | White females                            | Black females    | White males      | Black males  | White females                               | Black females          | White males            | Black males |
| <b>MISCAN</b> | COL        | 50-75, 10                                | 45-75, 10        | 50-75, 10        | 45-75, 10    | 45-75-10                                    | 45-75-10               | 45-75-5                | 45-75-10    |
|               | Stool      | <b>X</b>                                 | FIT 45-75, 1     | FIT 50-75, 1     | FIT 45-75, 1 | FIT 45-75-1                                 | FIT 45-75-1            | <b>FIT-DNA 45-75-1</b> | FIT 45-75-1 |
|               | SIG        | -                                        | -                | -                | -            | <b>X</b>                                    | <b>X</b>               | -                      | <b>X</b>    |
|               | CTC        | <b>X</b>                                 | <b>X</b>         | <b>X</b>         | <b>X</b>     | <b>X</b>                                    | <b>X</b>               | -                      | <b>X</b>    |
| <b>SimCRC</b> | COL        | 45-75, 15                                | <b>45-75, 10</b> | <b>45-75, 10</b> | 45-75, 15    | 45-75-10                                    | 45-75-10               | 45-75-10               | 45-75-10    |
|               | Stool      | FIT 45-75, 1                             | FIT 45-75, 1     | FIT 45-75, 1     | FIT 45-75, 1 | <b>X</b>                                    | <b>FIT-DNA 45-75-1</b> | FIT 45-75-1            | FIT 45-75-1 |
|               | SIG        | -                                        | -                | -                | -            | 45-75-5                                     | 45-75-5                | 45-75-5                | 45-75-5     |
|               | CTC        | 45-75, 5                                 | 45-75, 5         | 45-75, 5         | 45-75, 5     | 45-75-5                                     | 45-75-5                | 45-75-5                | 45-75-5     |

Abbreviations: - = no model-recommendable strategy within this class; COL = colonoscopy; CRC = colorectal cancer; CTC = computed tomographic colonography; FIT = fecal immunochemical test; FIT-DNA = multitarget stool DNA test; SIG = flexible sigmoidoscopy; X = class of screening modality was no longer recommended in the sensitivity analysis.

<sup>a</sup> Numbers in each field of the table successively represent recommended age to start screening, age to stop, and interval, all in years. For the class of stool-based screening modalities, the model-recommendable modality is also included, i.e. FIT or FIT-DNA. Changes from the base-case are designated in bold-faced letters. Worst-case test performance assumptions are provided in Table 1.

<sup>b</sup> Risk within each age-, race-, and sex-specific demographic subgroup was assumed to have remained stable over time since the early screening period in the U.S (1975-1979 for SimCRC; 1990-1994 for MISCAN).

<sup>c</sup> CRC risk was increased proportional to observed trends in CRC incidence among adults under 40 years old. Estimated incidence rate ratios were 1.80-1.90 for white females (range across models), 1.24-1.27 for black females, 2.07-2.13 for white males, and 1.41-1.56 for black males.

**Supplementary Table 10. Model-Recommendable Strategies under Two Scenarios of CRC Risk, Applying a Lower Acceptance Threshold for LYG Relative to the Benchmark Colonoscopy Strategy <sup>a</sup>**

| Model  | Test class | Scenario 1: Stable CRC risk <sup>b</sup> |                 |                 |                 | Scenario 2: Increased CRC risk <sup>c</sup> |               |                     |              |
|--------|------------|------------------------------------------|-----------------|-----------------|-----------------|---------------------------------------------|---------------|---------------------|--------------|
|        |            | White females                            | Black females   | White males     | Black males     | White females                               | Black females | White males         | Black males  |
| MISCAN | COL        | 50-75, 10                                | 45-75, 10       | 50-75, 10       | 45-75, 10       | 45-75, 10                                   | 45-75, 10     | 45-75, 5            | 45-75, 10    |
|        | Stool      | FIT 50-75, 1                             | FIT 45-75, 1    | FIT 50-75, 1    | FIT 45-75, 1    | FIT 45-75, 1                                | FIT 45-75, 1  | <b>FIT 45-75, 1</b> | FIT 45-75, 1 |
|        | SIG        | <b>50-75, 5</b>                          | <b>45-75, 5</b> | <b>50-75, 5</b> | <b>45-75, 5</b> | 45-75, 5                                    | 45-75, 5      | <b>45-75, 5</b>     | 45-75, 5     |
|        | CTC        | 50-75, 5                                 | 45-75, 5        | 50-75, 5        | 45-75, 5        | 45-75, 5                                    | 45-75, 5      | <b>45-75, 5</b>     | 45-75, 5     |
| SimCRC | COL        | 45-75, 15                                | 45-75, 15       | 45-75, 15       | 45-75, 15       | 45-75, 10                                   | 45-75, 10     | 45-75, 10           | 45-75, 10    |
|        | Stool      | FIT 45-75, 1                             | FIT 45-75, 1    | FIT 45-75, 1    | FIT 45-75, 1    | FIT 45-75, 1                                | FIT 45-75, 1  | FIT 45-75, 1        | FIT 45-75, 1 |
|        | SIG        | <b>45-75, 5</b>                          | <b>45-75, 5</b> | <b>45-75, 5</b> | <b>45-75, 5</b> | 45-75, 5                                    | 45-75, 5      | 45-75, 5            | 45-75, 5     |
|        | CTC        | 45-75, 5                                 | 45-75, 5        | 45-75, 5        | 45-75, 5        | 45-75, 5                                    | 45-75, 5      | 45-75, 5            | 45-75, 5     |

Abbreviations: COL = colonoscopy; CRC = colorectal cancer; CTC = computed tomographic colonography; FIT = fecal immunochemical test; SIG = flexible sigmoidoscopy.

<sup>a</sup> Model-recommendable strategies were required to provide at least 75% (rather than 90% in the base-case) of the predicted LYG for the model-recommendable colonoscopy screening strategy. Numbers in each field of the table successively represent recommended age to start screening, age to stop, and interval, all in years. For the class of stool-based screening modalities, the model-recommendable modality is also included, i.e. FIT. Changes from the base-case are designated in bold-faced letters.

<sup>b</sup> Risk within each age-, race-, and sex-specific demographic subgroup was assumed to have remained stable over time since the early screening period in the U.S (1975-1979 for SimCRC; 1990-1994 for MISCAN).

<sup>c</sup> CRC risk was increased proportional to observed trends in CRC incidence among adults under 40 years old. Estimated incidence rate ratios were 1.80-1.90 for white females (range across models), 1.24-1.27 for black females, 2.07-2.13 for white males, and 1.41-1.56 for black males.

**Supplementary Table 11. Model-Recommendable Strategies under Two Scenarios of CRC Risk, Applying a More Stringent Acceptance Threshold for Required Number of Colonoscopies per LYG <sup>a</sup>**

| Model  | Test class | Scenario 1: Stable CRC risk <sup>b</sup> |                     |              |                     | Scenario 2: Increased CRC risk <sup>c</sup> |               |              |              |
|--------|------------|------------------------------------------|---------------------|--------------|---------------------|---------------------------------------------|---------------|--------------|--------------|
|        |            | White females                            | Black females       | White males  | Black males         | White females                               | Black females | White males  | Black males  |
| MISCAN | COL        | 50-75, 10 <sup>d</sup>                   | <b>50-75, 10</b>    | 50-75, 10    | <b>50-75, 10</b>    | 45-75, 10                                   | 45-75, 10     | 45-75, 5     | 45-75, 10    |
|        | Stool      | FIT 50-75, 1                             | <b>FIT 50-75, 1</b> | FIT 50-75, 1 | <b>FIT 50-75, 1</b> | FIT 45-75, 1                                | FIT 45-75, 1  | -            | FIT 45-75, 1 |
|        | SIG        | -                                        | -                   | -            | -                   | 45-75, 5                                    | 45-75, 5      | -            | 45-75, 5     |
|        | CTC        | 50-75, 5                                 | <b>50-75, 5</b>     | 50-75, 5     | <b>50-75, 5</b>     | 45-75, 5                                    | 45-75, 5      | -            | 45-75, 5     |
| SimCRC | COL        | 45-75, 15                                | 45-75, 15           | 45-75, 15    | 45-75, 15           | 45-75, 10                                   | 45-75, 10     | 45-75, 10    | 45-75, 10    |
|        | Stool      | FIT 45-75, 1                             | FIT 45-75, 1        | FIT 45-75, 1 | FIT 45-75, 1        | FIT 45-75, 1                                | FIT 45-75, 1  | FIT 45-75, 1 | FIT 45-75, 1 |
|        | SIG        | -                                        | -                   | -            | -                   | 45-75, 5                                    | 45-75, 5      | 45-75, 5     | 45-75, 5     |
|        | CTC        | 45-75, 5                                 | 45-75, 5            | 45-75, 5     | 45-75, 5            | 45-75, 5                                    | 45-75, 5      | 45-75, 5     | 45-75, 5     |

Abbreviations: - = no model-recommendable strategy within this class; COL = colonoscopy; CRC = colorectal cancer; CTC = computed tomographic colonography; FIT = fecal immunochemical test; SIG = flexible sigmoidoscopy.

<sup>a</sup> Model-recommendable strategies could require no more than 40 additional colonoscopies per LYG (rather than 50 in the base-case) compared to the next less effective strategy on the efficient frontier. Numbers in each field of the table successively represent recommended age to start screening, age to stop, and interval, all in years. For the class of stool-based screening modalities, the model-recommendable modality is also included, i.e. FIT. Changes from the base-case are designated in bold-faced letters.

<sup>b</sup> Risk within each age-, race-, and sex-specific demographic subgroup was assumed to have remained stable over time since the early screening period in the U.S (1975-1979 for SimCRC; 1990-1994 for MISCAN).

<sup>c</sup> CRC risk was increased proportional to observed trends in CRC incidence among adults under 40 years old. Estimated incidence rate ratios were 1.80-1.90 for white females (range across models), 1.24-1.27 for black females, 2.07-2.13 for white males, and 1.41-1.56 for black males.

<sup>d</sup> For white females, MISCAN-Colon recommended colonoscopy every 10 years between age 50 and 75 years despite failure to meet the applied burden-to-benefit ratio criterion. Less intensive strategies did not meet the prioritized benefit criterion.
